# Supplementary material for: Identification of Candidate Coral Pathogens on White Band Disease-Infected Staghorn Coral
Source: PLoS One. 2015 Aug 4;10(8):e0134416. doi: 10.1371/journal.pone.0134416 (PMC4524643; doi:10.1371/journal.pone.0134416)
Supplement: S3 Table — (XLSX) [file pone.0134416.s003.xlsx]

## Sheet: supplementary_table_1_revised.c
Supplementary Table 3. Significantly different OTUs between diseased and healthy for the field and tank datasets
OTU names	baseMean_field	log2FC_field	padj_field	baseMean_tank	log2FC_tank	padj_tank	Tier	taxonomy	evalue
4393266	8.0428	3.06034	0.008992	20.0278	-3.90878	0.0446388	1	k__Bacteria; p__Actinobacteria; c__Acidimicrobiia; o__Acidimicrobiales; f__JdFBGBact; g__; s__	6e-34
New.ReferenceOTU36894	10.9843	4.32208	6.53e-05	7.05958	4.38578	0.013723	1	k__Bacteria; p__Bacteroidetes; c__[Saprospirae]; o__[Saprospirales]; f__Saprospiraceae; g__Saprospira; s__	1e-19
334436	93.0761	4.94337	2.49e-06	16.1241	4.2269	0.00798891	1	k__Bacteria; p__Bacteroidetes; c__Cytophagia; o__Cytophagales; f__Flammeovirgaceae; g__; s__	2e-34
New.ReferenceOTU28725	38.9751	6.55492	4.57e-09	177.109	7.56938	2.56e-10	1	k__Bacteria; p__Bacteroidetes; c__Flavobacteriia; o__Flavobacteriales; f__; g__; s__	5e-22
New.ReferenceOTU32760	0.291631	-4.69756	0.0325904	107.083	8.03325	4.33e-08	1	k__Bacteria; p__Bacteroidetes; c__Flavobacteriia; o__Flavobacteriales; f__; g__; s__	8e-18
4371996	88.587	5.93011	3.43e-05	319.322	5.65271	0.000142009	1	k__Bacteria; p__Bacteroidetes; c__Flavobacteriia; o__Flavobacteriales; f__; g__; s__	4e-29
364651	3.78965	5.31191	0.00408881	53.2176	6.57328	0.000202984	1	k__Bacteria; p__Bacteroidetes; c__Flavobacteriia; o__Flavobacteriales; f__; g__; s__	6e-34
784642	10.2729	2.81501	0.0357565	110.294	3.77004	0.00535934	1	k__Bacteria; p__Bacteroidetes; c__Flavobacteriia; o__Flavobacteriales; f__Cryomorphaceae; g__; s__	6e-34
170689	511.534	5.02111	3.08e-12	4305.85	6.47598	4.44e-09	1	k__Bacteria; p__Bacteroidetes; c__Flavobacteriia; o__Flavobacteriales; f__Cryomorphaceae; g__Fluviicola; s__	6e-34
New.ReferenceOTU16484	0.724114	4.43294	0.0367871	3.91249	5.16859	0.00477279	1	k__Bacteria; p__Bacteroidetes; c__Flavobacteriia; o__Flavobacteriales; f__Cryomorphaceae; g__Fluviicola; s__	9e-27
1112555	2.30765	-2.72348	0.0445852	1492.49	5.79173	4.44e-09	1	k__Bacteria; p__Bacteroidetes; c__Flavobacteriia; o__Flavobacteriales; f__Flavobacteriaceae; g__; s__	6e-34
150237	2.12031	4.93352	0.000724019	1074.95	6.02754	4.04e-07	1	k__Bacteria; p__Bacteroidetes; c__Flavobacteriia; o__Flavobacteriales; f__Flavobacteriaceae; g__; s__	6e-34
772296	14.1583	5.24664	2.63e-09	542.66	5.5854	7.13e-06	1	k__Bacteria; p__Bacteroidetes; c__Flavobacteriia; o__Flavobacteriales; f__Flavobacteriaceae; g__; s__	1e-31
93747	1882.18	4.94248	8.9e-11	11564.3	4.34244	1.63e-05	1	k__Bacteria; p__Bacteroidetes; c__Flavobacteriia; o__Flavobacteriales; f__Flavobacteriaceae; g__; s__	6e-34
103364	5.48241	5.26371	0.000565255	39.7419	4.85451	6.46e-05	1	k__Bacteria; p__Bacteroidetes; c__Flavobacteriia; o__Flavobacteriales; f__Flavobacteriaceae; g__; s__	1e-31
4379258	12.9478	3.16657	0.00090628	4313.37	4.18136	0.000125278	1	k__Bacteria; p__Bacteroidetes; c__Flavobacteriia; o__Flavobacteriales; f__Flavobacteriaceae; g__; s__	6e-34
4453767	210.988	5.40239	2.72e-19	1765.06	4.25443	0.000238838	1	k__Bacteria; p__Bacteroidetes; c__Flavobacteriia; o__Flavobacteriales; f__Flavobacteriaceae; g__; s__	6e-34
2931201	4.47087	4.58984	4.85e-05	979.147	4.51206	0.000275014	1	k__Bacteria; p__Bacteroidetes; c__Flavobacteriia; o__Flavobacteriales; f__Flavobacteriaceae; g__; s__	6e-34
812333	18.7998	3.28814	0.00422776	472.02	3.91874	0.00156354	1	k__Bacteria; p__Bacteroidetes; c__Flavobacteriia; o__Flavobacteriales; f__Flavobacteriaceae; g__; s__	2e-33
145264	34.6106	6.06458	4.83e-12	26.9198	5.46172	0.00252402	1	k__Bacteria; p__Bacteroidetes; c__Flavobacteriia; o__Flavobacteriales; f__Flavobacteriaceae; g__; s__	4e-29
136017	9.83912	2.74986	0.00223367	4728.21	3.05506	0.00330888	1	k__Bacteria; p__Bacteroidetes; c__Flavobacteriia; o__Flavobacteriales; f__Flavobacteriaceae; g__; s__	6e-34
3423662	2.57692	4.41757	0.00744597	12.0327	4.21494	0.00349371	1	k__Bacteria; p__Bacteroidetes; c__Flavobacteriia; o__Flavobacteriales; f__Flavobacteriaceae; g__; s__	6e-34
New.ReferenceOTU15509	22.8794	4.31136	0.000722377	168.215	-4.77208	0.00470585	1	k__Bacteria; p__Bacteroidetes; c__Flavobacteriia; o__Flavobacteriales; f__Flavobacteriaceae; g__; s__	4e-16
1112206	13.6451	7.44368	1.92e-09	127.961	4.34237	0.00721955	1	k__Bacteria; p__Bacteroidetes; c__Flavobacteriia; o__Flavobacteriales; f__Flavobacteriaceae; g__; s__	6e-34
542003	125.57	6.34582	7.56e-13	54.2416	3.97393	0.0125672	1	k__Bacteria; p__Bacteroidetes; c__Flavobacteriia; o__Flavobacteriales; f__Flavobacteriaceae; g__; s__	6e-34
322445	937.762	6.63903	6.81e-17	53.3871	3.1752	0.0140056	1	k__Bacteria; p__Bacteroidetes; c__Flavobacteriia; o__Flavobacteriales; f__Flavobacteriaceae; g__; s__	6e-34
4457930	3.13921	5.36182	0.00135833	31.6668	3.93221	0.0159499	1	k__Bacteria; p__Bacteroidetes; c__Flavobacteriia; o__Flavobacteriales; f__Flavobacteriaceae; g__; s__	6e-34
4371455	550.829	6.71158	2.87e-11	361.396	3.75578	0.0249231	1	k__Bacteria; p__Bacteroidetes; c__Flavobacteriia; o__Flavobacteriales; f__Flavobacteriaceae; g__; s__	6e-34
590020	1.7083	4.52428	0.010795	7.21303	3.35716	0.0312976	1	k__Bacteria; p__Bacteroidetes; c__Flavobacteriia; o__Flavobacteriales; f__Flavobacteriaceae; g__; s__	6e-34
4457349	34.6144	4.95539	1.01e-07	1150.39	6.11433	9.25e-08	1	k__Bacteria; p__Bacteroidetes; c__Flavobacteriia; o__Flavobacteriales; f__Flavobacteriaceae; g__Polaribacter; s__	6e-34
4449319	7.14685	6.45291	0.000313596	194.449	6.85564	6.31e-08	1	k__Bacteria; p__Bacteroidetes; c__Flavobacteriia; o__Flavobacteriales; f__Flavobacteriaceae; g__Tenacibaculum; s__	6e-34
783504	43.1117	6.1225	4.03e-12	48.75	5.36686	0.000970916	1	k__Bacteria; p__Bacteroidetes; c__Flavobacteriia; o__Flavobacteriales; f__Flavobacteriaceae; g__Tenacibaculum; s__	4e-29
38733	1862.33	5.13302	1.32e-16	60.643	-2.04641	0.031369	1	k__Bacteria; p__Cyanobacteria; c__Chloroplast; o__Stramenopiles; f__; g__; s__	1e-35
4322607	612.11	3.17455	8.32e-07	835.53	-2.97499	0.0348779	1	k__Bacteria; p__Cyanobacteria; c__Chloroplast; o__Stramenopiles; f__; g__; s__	3e-17
549748	21044.4	7.43918	5.01e-39	542.508	2.14481	0.040364	1	k__Bacteria; p__Cyanobacteria; c__Chloroplast; o__Stramenopiles; f__; g__; s__	1e-19
4323063	1.37884	4.03856	0.0171706	30.2142	2.44423	0.0366178	1	k__Bacteria; p__Proteobacteria; c__Alphaproteobacteria; o__Kordiimonadales; f__Kordiimonadaceae; g__; s__	3e-33
4303428	698.623	4.20669	2.33e-20	2220.45	2.74755	1.41e-05	1	k__Bacteria; p__Proteobacteria; c__Alphaproteobacteria; o__Rhodobacterales; f__Rhodobacteraceae; g__; s__	1e-35
4192023	84.5144	3.90428	6.02e-16	256.166	2.72794	1.41e-05	1	k__Bacteria; p__Proteobacteria; c__Alphaproteobacteria; o__Rhodobacterales; f__Rhodobacteraceae; g__; s__	7e-27
33766	1.60988	3.45027	0.00374826	2.39945	2.50736	0.0404289	1	k__Bacteria; p__Proteobacteria; c__Alphaproteobacteria; o__Rhodobacterales; f__Rhodobacteraceae; g__; s__	2e-33
904675	10.5533	3.50449	0.000183601	1108.04	2.17634	0.0113882	1	k__Bacteria; p__Proteobacteria; c__Alphaproteobacteria; o__Rhodobacterales; f__Rhodobacteraceae; g__Nautella; s__	1e-35
325735	673.106	1.86043	0.0287112	1012.83	3.08369	0.039465	1	k__Bacteria; p__Proteobacteria; c__Alphaproteobacteria; o__Rickettsiales; f__Rickettsiaceae; g__; s__	4e-38
4462210	24.3955	-1.94643	0.00539778	1029.03	-2.9562	0.00806281	1	k__Bacteria; p__Proteobacteria; c__Betaproteobacteria; o__Burkholderiales; f__Burkholderiaceae; g__Burkholderia; s__	7e-37
10535	16.5086	5.18583	0.002708	5.81351	4.9868	0.00914122	1	k__Bacteria; p__Proteobacteria; c__Deltaproteobacteria; o__Bdellovibrionales; f__Bacteriovoracaceae; g__; s__	6e-34
New.ReferenceOTU2250	6.69902	2.95131	0.041562	18.0419	4.25073	0.00402743	1	k__Bacteria; p__Proteobacteria; c__Deltaproteobacteria; o__Desulfobacterales; f__Desulfobacteraceae; g__; s__	1e-16
New.ReferenceOTU21205	4.04283	3.68159	0.00332263	367.664	3.04654	0.0206436	1	k__Bacteria; p__Proteobacteria; c__Deltaproteobacteria; o__Spirobacillales; f__; g__; s__	5e-22
537908	26551.6	-3.15577	7.28e-06	836.469	-2.75561	0.02075	1	k__Bacteria; p__Proteobacteria; c__Epsilonproteobacteria; o__Campylobacterales; f__; g__; s__	4e-38
New.ReferenceOTU3513	438.635	6.60167	4.74e-13	184.902	6.58898	9.25e-08	1	k__Bacteria; p__Proteobacteria; c__Epsilonproteobacteria; o__Campylobacterales; f__Campylobacteraceae; g__Arcobacter; s__	2e-24
227146	4195.36	7.45706	2.74e-29	975.925	4.17919	0.00286968	1	k__Bacteria; p__Proteobacteria; c__Epsilonproteobacteria; o__Campylobacterales; f__Campylobacteraceae; g__Arcobacter; s__	3e-33
New.ReferenceOTU6914	12.9143	6.67752	4.92e-05	2.64551	5.15556	0.00356911	1	k__Bacteria; p__Proteobacteria; c__Epsilonproteobacteria; o__Campylobacterales; f__Campylobacteraceae; g__Arcobacter; s__	3e-30
1146994	1009.85	7.5177	5.14e-30	191.806	3.74557	0.015348	1	k__Bacteria; p__Proteobacteria; c__Epsilonproteobacteria; o__Campylobacterales; f__Campylobacteraceae; g__Arcobacter; s__	2e-30
New.ReferenceOTU19357	5.46428	5.27292	0.00404293	2.16514	4.28175	0.0319272	1	k__Bacteria; p__Proteobacteria; c__Epsilonproteobacteria; o__Campylobacterales; f__Campylobacteraceae; g__Arcobacter; s__	2e-28
New.ReferenceOTU294	11.1071	5.78924	0.000408853	1.98484	4.11869	0.04046	1	k__Bacteria; p__Proteobacteria; c__Epsilonproteobacteria; o__Campylobacterales; f__Campylobacteraceae; g__Arcobacter; s__	2e-28
105235	4299.19	7.11944	5.36e-21	209.55	4.97098	0.000926143	1	k__Bacteria; p__Proteobacteria; c__Epsilonproteobacteria; o__Campylobacterales; f__Campylobacteraceae; g__Arcobacter; s__cryaerophilus	1e-35
New.ReferenceOTU4847	2.5016	3.64014	6.46e-05	6.77792	4.79369	0.000736437	1	k__Bacteria; p__Proteobacteria; c__Gammaproteobacteria; o__; f__; g__; s__	4e-32
New.ReferenceOTU32107	3.46565	4.14925	0.0041082	9.13671	4.6458	0.00162045	1	k__Bacteria; p__Proteobacteria; c__Gammaproteobacteria; o__; f__; g__; s__	6e-34
1109623	5.16987	5.32848	7.21e-05	6.50651	4.56699	0.00403186	1	k__Bacteria; p__Proteobacteria; c__Gammaproteobacteria; o__; f__; g__; s__	2e-34
813271	2.7628	4.36172	0.00319304	2.45127	5.00308	0.00564652	1	k__Bacteria; p__Proteobacteria; c__Gammaproteobacteria; o__; f__; g__; s__	2e-33
4306505	396.399	6.57976	1.77e-19	13.7503	3.14335	0.0396874	1	k__Bacteria; p__Proteobacteria; c__Gammaproteobacteria; o__Alteromonadales; f__; g__; s__	6e-31
318714	778.35	4.8892	4.95e-08	359.534	3.07074	0.00457514	1	k__Bacteria; p__Proteobacteria; c__Gammaproteobacteria; o__Alteromonadales; f__Alteromonadaceae; g__BD2-13; s__	1e-35
New.ReferenceOTU3074	7.96372	4.67022	0.00293409	15.2816	4.75226	0.00749037	1	k__Bacteria; p__Proteobacteria; c__Gammaproteobacteria; o__Alteromonadales; f__Alteromonadaceae; g__BD2-13; s__	1e-28
New.ReferenceOTU37374	4.47325	3.80177	0.0379769	5.48492	3.93517	0.011573	1	k__Bacteria; p__Proteobacteria; c__Gammaproteobacteria; o__Alteromonadales; f__Alteromonadaceae; g__BD2-13; s__	2e-30
91492	282.546	-3.80333	9.48e-12	1083.47	2.14187	0.0343856	1	k__Bacteria; p__Proteobacteria; c__Gammaproteobacteria; o__Alteromonadales; f__Alteromonadaceae; g__Glaciecola; s__	1e-35
New.ReferenceOTU969	15.7668	5.36992	0.00329704	34.2924	5.25959	0.00102445	1	k__Bacteria; p__Proteobacteria; c__Gammaproteobacteria; o__Alteromonadales; f__Alteromonadaceae; g__HB2-32-21; s__	3e-17
620458	38.2256	2.14741	0.0184752	200.31	6.64937	2.64e-07	1	k__Bacteria; p__Proteobacteria; c__Gammaproteobacteria; o__Alteromonadales; f__Colwelliaceae; g__; s__	1e-35
816423	2008.16	4.25988	2.05e-10	123.422	3.36607	0.0123564	1	k__Bacteria; p__Proteobacteria; c__Gammaproteobacteria; o__Alteromonadales; f__Colwelliaceae; g__; s__	1e-35
4434849	2656.6	6.29367	1.61e-32	3232.89	5.14671	6.21e-07	1	k__Bacteria; p__Proteobacteria; c__Gammaproteobacteria; o__Alteromonadales; f__Colwelliaceae; g__Thalassomonas; s__	1e-35
4471819	4683.96	5.74072	1.19e-23	1354.42	3.27368	0.000125956	1	k__Bacteria; p__Proteobacteria; c__Gammaproteobacteria; o__Alteromonadales; f__Colwelliaceae; g__Thalassomonas; s__	2e-33
225795	3.40274	4.69096	3.12e-05	6.54677	5.23311	0.000893661	1	k__Bacteria; p__Proteobacteria; c__Gammaproteobacteria; o__Alteromonadales; f__Colwelliaceae; g__Thalassomonas; s__	6e-31
823088	6.27258	4.36157	3.21e-05	8.16262	3.79959	0.00137714	1	k__Bacteria; p__Proteobacteria; c__Gammaproteobacteria; o__Alteromonadales; f__Colwelliaceae; g__Thalassomonas; s__	6e-31
148452	399.779	5.07783	3e-11	661.421	3.70144	0.00793725	1	k__Bacteria; p__Proteobacteria; c__Gammaproteobacteria; o__Alteromonadales; f__HTCC2188; g__HTCC; s__	7e-27
351489	11.7622	4.26828	9.81e-05	123.351	4.56573	0.00604184	1	k__Bacteria; p__Proteobacteria; c__Gammaproteobacteria; o__Alteromonadales; f__OM60; g__; s__	2e-33
524618	7.15379	2.82783	0.0105369	5.5395	4.6093	0.00893635	1	k__Bacteria; p__Proteobacteria; c__Gammaproteobacteria; o__Enterobacteriales; f__Enterobacteriaceae; g__; s__	2e-31
4477244	19.5456	3.39137	8.02e-06	15.591	4.26294	0.009663	1	k__Bacteria; p__Proteobacteria; c__Gammaproteobacteria; o__Enterobacteriales; f__Enterobacteriaceae; g__; s__	6e-34
New.ReferenceOTU12912	1870.09	5.40733	3.43e-21	178.238	2.73529	0.0497263	1	k__Bacteria; p__Proteobacteria; c__Gammaproteobacteria; o__Enterobacteriales; f__Enterobacteriaceae; g__; s__	1e-22
1134441	18.6889	3.64503	0.0484616	3.95235	4.31229	0.0138374	1	k__Bacteria; p__Proteobacteria; c__Gammaproteobacteria; o__Enterobacteriales; f__Enterobacteriaceae; g__Klebsiella; s__	6e-34
4440497	0.790898	3.68439	0.0201973	2.59357	4.93193	0.00749037	1	k__Bacteria; p__Proteobacteria; c__Gammaproteobacteria; o__Enterobacteriales; f__Enterobacteriaceae; g__Proteus; s__	2e-33
173408	6119.51	5.62999	9.28e-32	15720.4	7.07653	2.47e-07	1	k__Bacteria; p__Proteobacteria; c__Gammaproteobacteria; o__Legionellales; f__Francisellaceae; g__; s__	1e-35
7722	1851.2	6.82184	5.54e-21	3254.88	3.71882	0.0155038	1	k__Bacteria; p__Proteobacteria; c__Gammaproteobacteria; o__Legionellales; f__Francisellaceae; g__Francisella; s__	1e-35
2350257	10.3205	4.17644	2.75e-07	5.53534	2.98556	0.0206436	1	k__Bacteria; p__Proteobacteria; c__Gammaproteobacteria; o__Oceanospirillales; f__Halomonadaceae; g__Halomonas; s__	2e-33
824281	2034.15	6.28111	8.96e-22	5215.49	6.40513	8.65e-08	1	k__Bacteria; p__Proteobacteria; c__Gammaproteobacteria; o__Oceanospirillales; f__Oceanospirillaceae; g__; s__	1e-35
4473769	0.441777	4.6551	0.0200112	7.74261	3.9983	0.00749037	1	k__Bacteria; p__Proteobacteria; c__Gammaproteobacteria; o__Oceanospirillales; f__Oceanospirillaceae; g__; s__	2e-33
1132384	1.86754	5.89053	0.00104536	296.85	2.54821	0.0294327	1	k__Bacteria; p__Proteobacteria; c__Gammaproteobacteria; o__Oceanospirillales; f__Oceanospirillaceae; g__; s__	1e-35
248961	9.90213	4.96378	2.21e-05	862.867	6.77925	2.56e-10	1	k__Bacteria; p__Proteobacteria; c__Gammaproteobacteria; o__Oceanospirillales; f__Oceanospirillaceae; g__Marinomonas; s__	1e-35
4332584	4325.26	7.09649	1.69e-46	1065.29	4.33407	4.14e-05	1	k__Bacteria; p__Proteobacteria; c__Gammaproteobacteria; o__Oceanospirillales; f__Oceanospirillaceae; g__Oleibacter; s__	1e-35
330888	365.96	6.59804	4.52e-28	436.754	4.69972	0.00029636	1	k__Bacteria; p__Proteobacteria; c__Gammaproteobacteria; o__Oceanospirillales; f__Oleiphilaceae; g__; s__	1e-35
New.ReferenceOTU28454	16.3074	2.44422	0.0471634	19.1154	3.95734	0.00617537	1	k__Bacteria; p__Proteobacteria; c__Gammaproteobacteria; o__Oceanospirillales; f__Oleiphilaceae; g__; s__	1e-28
New.ReferenceOTU32047	3.19533	4.51144	0.0084748	126.393	6.59857	3.53e-05	1	k__Bacteria; p__Proteobacteria; c__Gammaproteobacteria; o__Thiotrichales; f__Piscirickettsiaceae; g__; s__	2e-21
New.ReferenceOTU16333	20.2242	5.68054	3.17e-05	21.6829	6.28375	7.18e-05	1	k__Bacteria; p__Proteobacteria; c__Gammaproteobacteria; o__Thiotrichales; f__Piscirickettsiaceae; g__; s__	4e-26
New.ReferenceOTU22153	3.29721	5.98804	0.000879177	57.9927	5.80713	0.00194085	1	k__Bacteria; p__Proteobacteria; c__Gammaproteobacteria; o__Thiotrichales; f__Piscirickettsiaceae; g__; s__	5e-19
550960	112.81	2.39043	0.00208032	46.9001	2.49469	0.013822	1	k__Bacteria; p__Proteobacteria; c__Gammaproteobacteria; o__Vibrionales; f__Vibrionaceae; g__; s__	1e-35
New.ReferenceOTU12480	3753.06	7.11377	1.04e-45	2590.47	7.00274	6.21e-07	1	k__Bacteria; p__Tenericutes; c__RF3; o__ML615J-28; f__; g__; s__	7e-09
New.ReferenceOTU21440	127.953	6.4104	1.89e-30	82.4089	6.14504	0.000853092	1	k__Bacteria; p__Tenericutes; c__RF3; o__ML615J-28; f__; g__; s__	7e-09
New.ReferenceOTU4955	262.972	7.8212	9.91e-30	170.175	5.17611	0.00535934	1	k__Bacteria; p__Tenericutes; c__RF3; o__ML615J-28; f__; g__; s__	6e-09
New.ReferenceOTU26874	75.8725	7.14089	2.65e-25	48.3986	4.92831	0.0119675	1	k__Bacteria; p__Tenericutes; c__RF3; o__ML615J-28; f__; g__; s__	7e-09
1601703	52.0338	3.9042	1.07e-05	27.0481	3.52046	0.0455748	1	k__Bacteria; p__Verrucomicrobia; c__Verrucomicrobiae; o__Verrucomicrobiales; f__Verrucomicrobiaceae; g__Rubritalea; s__	4e-35
New.ReferenceOTU9673	30.0193	4.59392	1.19e-05	3750.12	7.24365	2.69e-07	1	No blast hit	None
New.ReferenceOTU21345	414.65	6.88095	4.28e-12	170.521	6.0862	7.17e-06	1	No blast hit	None
New.ReferenceOTU16399	17.8022	4.86595	0.000110447	2603.56	5.81776	1.08e-05	1	No blast hit	None
New.ReferenceOTU28400	3103.34	6.89001	5.77e-22	1566.64	5.24255	1.27e-05	1	No blast hit	None
New.ReferenceOTU6147	448.789	6.83975	5.36e-21	209.889	4.6566	7e-05	1	No blast hit	None
New.ReferenceOTU27649	411.906	7.70055	5.46e-17	179.898	5.02532	0.00102445	1	No blast hit	None
New.ReferenceOTU13339	21.9514	6.56684	6.18e-09	10.0874	4.50431	0.00324768	1	No blast hit	None
New.ReferenceOTU22880	42.3826	6.10369	6.69e-07	17.3496	4.55282	0.00407861	1	No blast hit	None
New.ReferenceOTU16848	4.59064	6.11211	5.6e-06	3.57943	5.18508	0.0042758	1	No blast hit	None
New.ReferenceOTU934	468.183	6.48059	7.66e-23	120.59	-4.46712	0.00604184	1	No blast hit	None
New.ReferenceOTU23631	8.172	4.18139	1.46e-06	8.62393	3.86707	0.00734452	1	No blast hit	None
New.ReferenceOTU26332	37.6889	7.10747	3.83e-11	14.31	4.47597	0.00798891	1	No blast hit	None
New.ReferenceOTU10676	0.965724	3.49794	0.0260726	48.7294	4.57543	0.00806281	1	No blast hit	None
New.ReferenceOTU30118	6.57043	5.56261	0.00459343	2.28243	4.53015	0.0184254	1	No blast hit	None
New.ReferenceOTU4134	39.1006	6.91123	5.32e-07	9.51665	-4.52673	0.0236848	1	No blast hit	None
190531	95.8107	-2.51561	2.64e-12	992.917	-1.32816	0.0402277	2 (both)	k__Bacteria; p__Bacteroidetes; c__[Saprospirae]; o__[Saprospirales]; f__Chitinophagaceae; g__Sediminibacterium; s__	3e-36
140098	0.67166	4.65012	0.021783	3.70304	4.41056	0.0107597	2 (year)	k__Bacteria; p__Bacteroidetes; c__Flavobacteriia; o__Flavobacteriales; f__Flavobacteriaceae; g__; s__	1e-31
779927	1.27945	5.36209	0.00457533	19.1001	4.39703	0.0324238	2 (year)	k__Bacteria; p__Bacteroidetes; c__Flavobacteriia; o__Flavobacteriales; f__Flavobacteriaceae; g__; s__	6e-34
271908	0.71926	3.12511	0.00982221	5.5219	3.45974	0.00230148	2 (year)	k__Bacteria; p__Proteobacteria; c__Alphaproteobacteria; o__Rhodobacterales; f__Rhodobacteraceae; g__; s__	1e-35
4461885	1.22369	3.31281	0.00175623	3.89656	3.30815	0.009663	2 (year)	k__Bacteria; p__Proteobacteria; c__Alphaproteobacteria; o__Rhodobacterales; f__Rhodobacteraceae; g__; s__	1e-35
4305878	802.402	-2.00598	4.65e-05	2263.12	-1.2546	0.0462046	2 (site)	k__Bacteria; p__Proteobacteria; c__Betaproteobacteria; o__Burkholderiales; f__Comamonadaceae; g__; s__	2e-34
4374991	0.901184	5.14007	0.00767311	4.14909	4.86118	0.0109684	2 (year)	k__Bacteria; p__Proteobacteria; c__Gammaproteobacteria; o__Alteromonadales; f__Alteromonadaceae; g__BD2-13; s__	1e-35
4342207	2.26749	6.27645	0.000218917	1.31424	3.98855	0.0476007	2 (year)	k__Bacteria; p__Proteobacteria; c__Gammaproteobacteria; o__Oceanospirillales; f__Oceanospirillaceae; g__Neptunomonas; s__	4e-35
347685	72.5313	-2.01451	0.000177911	99.0609	-3.42905	0.0315477	2 (site)	k__Bacteria; p__Proteobacteria; c__Gammaproteobacteria; o__Pseudomonadales; f__Moraxellaceae; g__Acinetobacter; s__guillouiae	1e-35
New.ReferenceOTU33585	5.21577	4.50561	1.63e-05	32.7674	4.95409	0.00905301	2 (both)	k__Bacteria; p__Tenericutes; c__RF3; o__ML615J-28; f__; g__; s__	7e-09
New.ReferenceOTU3569	1.66926	6.02896	0.000532927	2.11699	4.32784	0.0289186	2 (year)	No blast hit	None
New.ReferenceOTU5881	1.81911	4.29197	0.000313596	4.60417	4.05595	0.0495182	2 (both)	No blast hit	None
New.ReferenceOTU18125	3.04623	4.69863	0.0278738	NA	NA	NA		k__Bacteria; p__; c__; o__; f__; g__; s__	1e-10
New.ReferenceOTU11756	12.505	6.18446	6.18e-06	NA	NA	NA		k__Bacteria; p__Acidobacteria; c__Acidobacteria-6; o__BPC015; f__; g__; s__	1e-10
1111501	6.91829	-1.58396	0.00753852	NA	NA	NA		k__Bacteria; p__Actinobacteria; c__Acidimicrobiia; o__Acidimicrobiales; f__OCS155; g__; s__	6e-34
1094594	1.84427	-4.94687	0.0209416	NA	NA	NA		k__Bacteria; p__Actinobacteria; c__Actinobacteria; o__Actinomycetales; f__Actinomycetaceae; g__Varibaculum; s__	2e-34
875245	11.2358	-3.63776	4.18e-08	NA	NA	NA		k__Bacteria; p__Actinobacteria; c__Actinobacteria; o__Actinomycetales; f__Corynebacteriaceae; g__Corynebacterium; s__	2e-34
1022363	63.1542	-2.71882	5.2e-06	NA	NA	NA		k__Bacteria; p__Actinobacteria; c__Actinobacteria; o__Actinomycetales; f__Corynebacteriaceae; g__Corynebacterium; s__	2e-34
977739	10.0019	-3.20523	1.33e-05	NA	NA	NA		k__Bacteria; p__Actinobacteria; c__Actinobacteria; o__Actinomycetales; f__Corynebacteriaceae; g__Corynebacterium; s__	1e-32
1052468	28.1641	-2.78027	4.17e-05	NA	NA	NA		k__Bacteria; p__Actinobacteria; c__Actinobacteria; o__Actinomycetales; f__Corynebacteriaceae; g__Corynebacterium; s__	4e-35
1046515	10.4921	-3.89855	5.42e-05	NA	NA	NA		k__Bacteria; p__Actinobacteria; c__Actinobacteria; o__Actinomycetales; f__Corynebacteriaceae; g__Corynebacterium; s__	2e-34
936143	0.651922	-3.40618	0.00201693	NA	NA	NA		k__Bacteria; p__Actinobacteria; c__Actinobacteria; o__Actinomycetales; f__Corynebacteriaceae; g__Corynebacterium; s__	2e-30
989522	1.78138	-3.0714	0.00254398	NA	NA	NA		k__Bacteria; p__Actinobacteria; c__Actinobacteria; o__Actinomycetales; f__Corynebacteriaceae; g__Corynebacterium; s__	2e-27
936750	21.9814	-3.07715	0.00288576	NA	NA	NA		k__Bacteria; p__Actinobacteria; c__Actinobacteria; o__Actinomycetales; f__Corynebacteriaceae; g__Corynebacterium; s__	4e-35
1093808	10.2668	-2.79121	0.0063896	NA	NA	NA		k__Bacteria; p__Actinobacteria; c__Actinobacteria; o__Actinomycetales; f__Corynebacteriaceae; g__Corynebacterium; s__	4e-35
874553	1.2912	-5.69928	0.00670865	NA	NA	NA		k__Bacteria; p__Actinobacteria; c__Actinobacteria; o__Actinomycetales; f__Corynebacteriaceae; g__Corynebacterium; s__	4e-35
845939	3.76606	-4.7552	0.00944343	NA	NA	NA		k__Bacteria; p__Actinobacteria; c__Actinobacteria; o__Actinomycetales; f__Dermabacteraceae; g__; s__	6e-34
4457504	0.556723	-4.57788	0.0464217	NA	NA	NA		k__Bacteria; p__Actinobacteria; c__Actinobacteria; o__Actinomycetales; f__Dermabacteraceae; g__; s__	6e-34
4458619	NA	NA	NA	2.56262	-4.11344	0.0402277		k__Bacteria; p__Actinobacteria; c__Actinobacteria; o__Actinomycetales; f__Dermacoccaceae; g__Dermacoccus; s__	6e-34
220439	0.640268	-4.66769	0.041336	NA	NA	NA		k__Bacteria; p__Actinobacteria; c__Actinobacteria; o__Actinomycetales; f__Geodermatophilaceae; g__Geodermatophilus; s__	6e-34
4458776	1.75343	-5.83044	0.00535106	NA	NA	NA		k__Bacteria; p__Actinobacteria; c__Actinobacteria; o__Actinomycetales; f__Microbacteriaceae; g__Leucobacter; s__	2e-30
812790	14.4639	-3.42749	0.00362034	NA	NA	NA		k__Bacteria; p__Actinobacteria; c__Actinobacteria; o__Actinomycetales; f__Micrococcaceae; g__Kocuria; s__palustris	1e-35
4411138	7.90633	-2.9348	0.0369196	NA	NA	NA		k__Bacteria; p__Actinobacteria; c__Actinobacteria; o__Actinomycetales; f__Micrococcaceae; g__Rothia; s__mucilaginosa	4e-35
495515	80.6249	-2.14985	4e-06	NA	NA	NA		k__Bacteria; p__Actinobacteria; c__Actinobacteria; o__Actinomycetales; f__Propionibacteriaceae; g__Propionibacterium; s__acnes	3e-36
1027318	13.3248	-2.76827	0.000722377	NA	NA	NA		k__Bacteria; p__Actinobacteria; c__Actinobacteria; o__Actinomycetales; f__Propionibacteriaceae; g__Propionibacterium; s__acnes	3e-36
461877	1.10779	-1.80379	0.0202993	NA	NA	NA		k__Bacteria; p__Actinobacteria; c__Actinobacteria; o__Actinomycetales; f__Propionibacteriaceae; g__Propionibacterium; s__acnes	1e-35
1098184	0.179551	-2.82879	0.032952	NA	NA	NA		k__Bacteria; p__Actinobacteria; c__Actinobacteria; o__Actinomycetales; f__Propionibacteriaceae; g__Propionibacterium; s__acnes	3e-36
137183	13.4436	-3.10877	0.00437586	NA	NA	NA		k__Bacteria; p__Actinobacteria; c__Actinobacteria; o__Bifidobacteriales; f__Bifidobacteriaceae; g__Gardnerella; s__	1e-32
New.ReferenceOTU15471	4.78125	6.06398	0.000987001	NA	NA	NA		k__Bacteria; p__Bacteroidetes; c__[Saprospirae]; o__[Saprospirales]; f__; g__; s__	1e-22
222635	1.48566	-6.27163	0.00753852	NA	NA	NA		k__Bacteria; p__Bacteroidetes; c__[Saprospirae]; o__[Saprospirales]; f__Chitinophagaceae; g__; s__	6e-34
93798	189.406	-2.49096	1.63e-16	NA	NA	NA		k__Bacteria; p__Bacteroidetes; c__[Saprospirae]; o__[Saprospirales]; f__Chitinophagaceae; g__Sediminibacterium; s__	3e-36
4394913	0.787257	-2.03318	0.00182107	NA	NA	NA		k__Bacteria; p__Bacteroidetes; c__[Saprospirae]; o__[Saprospirales]; f__Chitinophagaceae; g__Sediminibacterium; s__	6e-34
New.ReferenceOTU9478	NA	NA	NA	8.88052	6.42725	7.18e-05		k__Bacteria; p__Bacteroidetes; c__[Saprospirae]; o__[Saprospirales]; f__Saprospiraceae; g__; s__	2e-21
New.ReferenceOTU23141	NA	NA	NA	49.3213	5.65209	0.000490119		k__Bacteria; p__Bacteroidetes; c__[Saprospirae]; o__[Saprospirales]; f__Saprospiraceae; g__; s__	1e-10
New.ReferenceOTU33548	NA	NA	NA	25.9494	4.08668	0.0130073		k__Bacteria; p__Bacteroidetes; c__[Saprospirae]; o__[Saprospirales]; f__Saprospiraceae; g__; s__	1e-13
590902	NA	NA	NA	3.33808	4.54846	0.0203838		k__Bacteria; p__Bacteroidetes; c__[Saprospirae]; o__[Saprospirales]; f__Saprospiraceae; g__; s__	6e-31
New.ReferenceOTU19500	NA	NA	NA	11.9165	4.47309	0.0217982		k__Bacteria; p__Bacteroidetes; c__[Saprospirae]; o__[Saprospirales]; f__Saprospiraceae; g__; s__	8e-18
887609	NA	NA	NA	574.364	3.47387	0.0302077		k__Bacteria; p__Bacteroidetes; c__[Saprospirae]; o__[Saprospirales]; f__Saprospiraceae; g__; s__	2e-34
New.ReferenceOTU28424	NA	NA	NA	1.86533	4.23188	0.0335376		k__Bacteria; p__Bacteroidetes; c__[Saprospirae]; o__[Saprospirales]; f__Saprospiraceae; g__; s__	5e-25
New.ReferenceOTU12665	NA	NA	NA	26.1794	3.41255	0.0404625		k__Bacteria; p__Bacteroidetes; c__[Saprospirae]; o__[Saprospirales]; f__Saprospiraceae; g__; s__	3e-17
New.ReferenceOTU22271	1245.19	6.94936	3.26e-11	NA	NA	NA		k__Bacteria; p__Bacteroidetes; c__[Saprospirae]; o__[Saprospirales]; f__Saprospiraceae; g__; s__	2e-27
2540	30.5162	7.72867	1.19e-06	NA	NA	NA		k__Bacteria; p__Bacteroidetes; c__[Saprospirae]; o__[Saprospirales]; f__Saprospiraceae; g__; s__	9e-30
New.ReferenceOTU25881	20.4389	6.78396	4.9e-06	NA	NA	NA		k__Bacteria; p__Bacteroidetes; c__[Saprospirae]; o__[Saprospirales]; f__Saprospiraceae; g__; s__	5e-16
New.ReferenceOTU26649	130.227	6.63611	1.14e-05	NA	NA	NA		k__Bacteria; p__Bacteroidetes; c__[Saprospirae]; o__[Saprospirales]; f__Saprospiraceae; g__; s__	1e-19
New.ReferenceOTU1354	14.7172	6.87131	1.4e-05	NA	NA	NA		k__Bacteria; p__Bacteroidetes; c__[Saprospirae]; o__[Saprospirales]; f__Saprospiraceae; g__; s__	2e-17
New.ReferenceOTU37439	45.478	5.76304	8e-05	NA	NA	NA		k__Bacteria; p__Bacteroidetes; c__[Saprospirae]; o__[Saprospirales]; f__Saprospiraceae; g__; s__	3e-23
New.ReferenceOTU7409	13.818	6.55513	0.000215963	NA	NA	NA		k__Bacteria; p__Bacteroidetes; c__[Saprospirae]; o__[Saprospirales]; f__Saprospiraceae; g__; s__	5e-13
314350	20.136	6.42267	0.000357852	NA	NA	NA		k__Bacteria; p__Bacteroidetes; c__[Saprospirae]; o__[Saprospirales]; f__Saprospiraceae; g__; s__	4e-35
351192	1.43531	4.90706	0.00391023	NA	NA	NA		k__Bacteria; p__Bacteroidetes; c__[Saprospirae]; o__[Saprospirales]; f__Saprospiraceae; g__; s__	4e-35
New.ReferenceOTU17214	5.77457	4.31581	0.0165502	NA	NA	NA		k__Bacteria; p__Bacteroidetes; c__[Saprospirae]; o__[Saprospirales]; f__Saprospiraceae; g__; s__	2e-24
807802	0.842248	4.68278	0.0223251	NA	NA	NA		k__Bacteria; p__Bacteroidetes; c__[Saprospirae]; o__[Saprospirales]; f__Saprospiraceae; g__; s__	4e-32
1050284	12.226	2.8846	0.0341835	NA	NA	NA		k__Bacteria; p__Bacteroidetes; c__[Saprospirae]; o__[Saprospirales]; f__Saprospiraceae; g__; s__	2e-34
1106011	1.38628	4.51104	0.035442	NA	NA	NA		k__Bacteria; p__Bacteroidetes; c__[Saprospirae]; o__[Saprospirales]; f__Saprospiraceae; g__; s__	2e-30
4471424	1.07438	4.10155	0.0445852	NA	NA	NA		k__Bacteria; p__Bacteroidetes; c__[Saprospirae]; o__[Saprospirales]; f__Saprospiraceae; g__; s__	2e-34
New.ReferenceOTU11838	1.10011	3.31964	0.0461829	NA	NA	NA		k__Bacteria; p__Bacteroidetes; c__[Saprospirae]; o__[Saprospirales]; f__Saprospiraceae; g__; s__	1e-28
New.ReferenceOTU25145	1.14256	4.25028	0.0473148	NA	NA	NA		k__Bacteria; p__Bacteroidetes; c__[Saprospirae]; o__[Saprospirales]; f__Saprospiraceae; g__; s__	3e-20
New.ReferenceOTU11974	NA	NA	NA	960.878	2.7315	0.0390179		k__Bacteria; p__Bacteroidetes; c__[Saprospirae]; o__[Saprospirales]; f__Saprospiraceae; g__Lewinella; s__	2e-27
New.ReferenceOTU32420	8.32645	6.70401	0.000123857	NA	NA	NA		k__Bacteria; p__Bacteroidetes; c__[Saprospirae]; o__[Saprospirales]; f__Saprospiraceae; g__Saprospira; s__	2e-12
New.ReferenceOTU28115	16.8829	5.77434	0.000170418	NA	NA	NA		k__Bacteria; p__Bacteroidetes; c__[Saprospirae]; o__[Saprospirales]; f__Saprospiraceae; g__Saprospira; s__	1e-25
New.ReferenceOTU24540	4.94466	5.11116	0.0124924	NA	NA	NA		k__Bacteria; p__Bacteroidetes; c__[Saprospirae]; o__[Saprospirales]; f__Saprospiraceae; g__Saprospira; s__	8e-21
New.ReferenceOTU23724	NA	NA	NA	8.62002	3.41461	0.0366063		k__Bacteria; p__Bacteroidetes; c__At12OctB3; o__; f__; g__; s__	5e-19
New.ReferenceOTU28410	NA	NA	NA	38.5267	4.09575	0.0113882		k__Bacteria; p__Bacteroidetes; c__Bacteroidia; o__Bacteroidales; f__; g__; s__	1e-13
New.ReferenceOTU3819	NA	NA	NA	18.075	4.25001	0.0200629		k__Bacteria; p__Bacteroidetes; c__Bacteroidia; o__Bacteroidales; f__; g__; s__	5e-19
New.ReferenceOTU10994	NA	NA	NA	7.63608	4.29297	0.0269007		k__Bacteria; p__Bacteroidetes; c__Bacteroidia; o__Bacteroidales; f__; g__; s__	1e-16
New.ReferenceOTU32224	13.2112	5.6742	0.000207311	NA	NA	NA		k__Bacteria; p__Bacteroidetes; c__Bacteroidia; o__Bacteroidales; f__; g__; s__	4e-10
286466	6.09271	4.00208	0.00200743	NA	NA	NA		k__Bacteria; p__Bacteroidetes; c__Bacteroidia; o__Bacteroidales; f__; g__; s__	6e-34
New.ReferenceOTU4487	NA	NA	NA	33.146	7.18808	9.55e-06		k__Bacteria; p__Bacteroidetes; c__Bacteroidia; o__Bacteroidales; f__Bacteroidaceae; g__Bacteroides; s__	7e-09
New.ReferenceOTU32010	NA	NA	NA	4.39537	4.20302	0.03968		k__Bacteria; p__Bacteroidetes; c__Bacteroidia; o__Bacteroidales; f__Bacteroidaceae; g__Bacteroides; s__	2e-08
New.ReferenceOTU1323	NA	NA	NA	2.24348	4.41584	0.0237469		k__Bacteria; p__Bacteroidetes; c__Bacteroidia; o__Bacteroidales; f__Prevotellaceae; g__Prevotella; s__	2e-21
4404224	1.40355	-4.42494	0.0308066	NA	NA	NA		k__Bacteria; p__Bacteroidetes; c__Bacteroidia; o__Bacteroidales; f__Prevotellaceae; g__Prevotella; s__copri	4e-35
New.ReferenceOTU16357	NA	NA	NA	9.60258	4.72574	0.0119997		k__Bacteria; p__Bacteroidetes; c__BME43; o__; f__; g__; s__	4e-10
275952	3.14521	6.70061	4.42e-05	NA	NA	NA		k__Bacteria; p__Bacteroidetes; c__BME43; o__; f__; g__; s__	2e-34
4040668	0.550526	4.52057	0.0276099	NA	NA	NA		k__Bacteria; p__Bacteroidetes; c__BME43; o__; f__; g__; s__	2e-33
New.ReferenceOTU2642	1.25995	3.88733	0.0237157	NA	NA	NA		k__Bacteria; p__Bacteroidetes; c__Cytophagia; o__Cytophagales; f__; g__; s__	7e-12
New.ReferenceOTU30537	2.57442	4.24225	0.0346074	NA	NA	NA		k__Bacteria; p__Bacteroidetes; c__Cytophagia; o__Cytophagales; f__; g__; s__	3e-11
New.ReferenceOTU19145	2.18039	4.91319	0.0162979	NA	NA	NA		k__Bacteria; p__Bacteroidetes; c__Cytophagia; o__Cytophagales; f__[Amoebophilaceae]; g__; s__	5e-22
169235	2.33716	5.94036	0.000974178	NA	NA	NA		k__Bacteria; p__Bacteroidetes; c__Cytophagia; o__Cytophagales; f__[Amoebophilaceae]; g__SC3-56; s__	4e-32
3440044	0.996764	5.31652	0.00473644	NA	NA	NA		k__Bacteria; p__Bacteroidetes; c__Cytophagia; o__Cytophagales; f__Cytophagaceae; g__Microscilla; s__	2e-33
New.ReferenceOTU22563	4115.05	6.3751	3.7e-11	NA	NA	NA		k__Bacteria; p__Bacteroidetes; c__Cytophagia; o__Cytophagales; f__Flammeovirgaceae; g__; s__	1e-10
221302	1.33224	3.97495	0.0111581	NA	NA	NA		k__Bacteria; p__Bacteroidetes; c__Cytophagia; o__Cytophagales; f__Flammeovirgaceae; g__; s__	2e-33
183196	10.4567	2.71377	0.0216832	NA	NA	NA		k__Bacteria; p__Bacteroidetes; c__Cytophagia; o__Cytophagales; f__Flammeovirgaceae; g__; s__	2e-33
New.ReferenceOTU8074	1.61262	4.54243	0.0328352	NA	NA	NA		k__Bacteria; p__Bacteroidetes; c__Cytophagia; o__Cytophagales; f__Flammeovirgaceae; g__; s__	5e-19
3423665	0.773155	3.75331	0.0381606	NA	NA	NA		k__Bacteria; p__Bacteroidetes; c__Cytophagia; o__Cytophagales; f__Flammeovirgaceae; g__; s__	4e-32
New.ReferenceOTU31995	0.562731	4.32805	0.0401409	NA	NA	NA		k__Bacteria; p__Bacteroidetes; c__Cytophagia; o__Cytophagales; f__Flammeovirgaceae; g__; s__	1e-16
New.ReferenceOTU28283	0.445456	4.29884	0.0421086	NA	NA	NA		k__Bacteria; p__Bacteroidetes; c__Cytophagia; o__Cytophagales; f__Flammeovirgaceae; g__; s__	6e-21
4481373	1.57469	5.77868	0.00132709	NA	NA	NA		k__Bacteria; p__Bacteroidetes; c__Cytophagia; o__Cytophagales; f__Flammeovirgaceae; g__Flammeovirga; s__	6e-34
New.ReferenceOTU24917	NA	NA	NA	11.7751	5.42207	0.00382312		k__Bacteria; p__Bacteroidetes; c__Cytophagia; o__Cytophagales; f__Flammeovirgaceae; g__Flexibacter; s__	2e-09
New.ReferenceOTU6191	12.819	5.42497	0.000218917	NA	NA	NA		k__Bacteria; p__Bacteroidetes; c__Cytophagia; o__Cytophagales; f__Flammeovirgaceae; g__Flexithrix; s__	1e-22
4430342	NA	NA	NA	1.71028	4.4672	0.0188948		k__Bacteria; p__Bacteroidetes; c__Cytophagia; o__Cytophagales; f__Flammeovirgaceae; g__JTB248; s__	2e-30
New.ReferenceOTU26565	14.0053	3.27309	7.57e-05	NA	NA	NA		k__Bacteria; p__Bacteroidetes; c__Cytophagia; o__Cytophagales; f__Flammeovirgaceae; g__JTB248; s__	6e-21
153017	74.5658	2.64574	0.00120149	NA	NA	NA		k__Bacteria; p__Bacteroidetes; c__Cytophagia; o__Cytophagales; f__Flammeovirgaceae; g__JTB248; s__	9e-30
New.ReferenceOTU4295	1.77142	5.16573	0.00931826	NA	NA	NA		k__Bacteria; p__Bacteroidetes; c__Cytophagia; o__Cytophagales; f__Flammeovirgaceae; g__JTB248; s__	3e-23
New.ReferenceOTU15592	2.48858	4.43158	0.0299919	NA	NA	NA		k__Bacteria; p__Bacteroidetes; c__Cytophagia; o__Cytophagales; f__Flammeovirgaceae; g__JTB248; s__	1e-16
New.ReferenceOTU24310	0.597304	4.32458	0.0404832	NA	NA	NA		k__Bacteria; p__Bacteroidetes; c__Cytophagia; o__Cytophagales; f__Flammeovirgaceae; g__JTB248; s__	8e-24
New.ReferenceOTU33970	0.486326	3.26493	0.0480168	NA	NA	NA		k__Bacteria; p__Bacteroidetes; c__Cytophagia; o__Cytophagales; f__Flammeovirgaceae; g__JTB248; s__	6e-21
New.ReferenceOTU8873	2.73238	6.38689	0.000193686	NA	NA	NA		k__Bacteria; p__Bacteroidetes; c__Cytophagia; o__Cytophagales; f__Flammeovirgaceae; g__Reichenbachiella; s__	3e-26
864027	1.63729	3.0787	0.0233277	NA	NA	NA		k__Bacteria; p__Bacteroidetes; c__Cytophagia; o__Cytophagales; f__Flammeovirgaceae; g__Reichenbachiella; s__	1e-28
3685952	NA	NA	NA	17.4197	5.12932	0.00815358		k__Bacteria; p__Bacteroidetes; c__Cytophagia; o__Cytophagales; f__Flammeovirgaceae; g__Roseivirga; s__	2e-33
136283	NA	NA	NA	5.74699	4.44976	0.0123759		k__Bacteria; p__Bacteroidetes; c__Cytophagia; o__Cytophagales; f__Flammeovirgaceae; g__Roseivirga; s__	4e-29
New.ReferenceOTU9499	NA	NA	NA	3.99261	4.71773	0.0149174		k__Bacteria; p__Bacteroidetes; c__Cytophagia; o__Cytophagales; f__Flammeovirgaceae; g__Roseivirga; s__	1e-25
New.ReferenceOTU13367	NA	NA	NA	2.97786	4.5266	0.0206436		k__Bacteria; p__Bacteroidetes; c__Cytophagia; o__Cytophagales; f__Flammeovirgaceae; g__Roseivirga; s__	2e-24
New.ReferenceOTU12588	NA	NA	NA	2.0712	4.17413	0.0377354		k__Bacteria; p__Bacteroidetes; c__Cytophagia; o__Cytophagales; f__Flammeovirgaceae; g__Roseivirga; s__	2e-15
677200	4.58799	4.60826	0.00217735	NA	NA	NA		k__Bacteria; p__Bacteroidetes; c__Cytophagia; o__Cytophagales; f__Flammeovirgaceae; g__Roseivirga; s__	1e-31
315013	NA	NA	NA	28.9694	7.56109	7.28e-07		k__Bacteria; p__Bacteroidetes; c__Flavobacteriia; o__Flavobacteriales; f__; g__; s__	6e-34
668402	NA	NA	NA	17.596	7.00162	9.55e-06		k__Bacteria; p__Bacteroidetes; c__Flavobacteriia; o__Flavobacteriales; f__; g__; s__	2e-30
New.ReferenceOTU18709	NA	NA	NA	283.01	6.60133	4.69e-05		k__Bacteria; p__Bacteroidetes; c__Flavobacteriia; o__Flavobacteriales; f__; g__; s__	9e-27
New.ReferenceOTU12783	NA	NA	NA	22.1176	6.72398	6.17e-05		k__Bacteria; p__Bacteroidetes; c__Flavobacteriia; o__Flavobacteriales; f__; g__; s__	9e-27
4367489	NA	NA	NA	208.312	6.30763	0.000515538		k__Bacteria; p__Bacteroidetes; c__Flavobacteriia; o__Flavobacteriales; f__; g__; s__	6e-34
334486	NA	NA	NA	118.099	4.72616	0.00162045		k__Bacteria; p__Bacteroidetes; c__Flavobacteriia; o__Flavobacteriales; f__; g__; s__	6e-34
New.ReferenceOTU27004	NA	NA	NA	265.147	5.20421	0.00440295		k__Bacteria; p__Bacteroidetes; c__Flavobacteriia; o__Flavobacteriales; f__; g__; s__	2e-24
352599	NA	NA	NA	57.6709	4.35777	0.00539405		k__Bacteria; p__Bacteroidetes; c__Flavobacteriia; o__Flavobacteriales; f__; g__; s__	4e-29
New.ReferenceOTU32708	NA	NA	NA	4.33503	5.00584	0.0079703		k__Bacteria; p__Bacteroidetes; c__Flavobacteriia; o__Flavobacteriales; f__; g__; s__	8e-21
107797	NA	NA	NA	81.4706	4.284	0.00798998		k__Bacteria; p__Bacteroidetes; c__Flavobacteriia; o__Flavobacteriales; f__; g__; s__	4e-29
New.ReferenceOTU32802	NA	NA	NA	1.91053	4.60056	0.0149174		k__Bacteria; p__Bacteroidetes; c__Flavobacteriia; o__Flavobacteriales; f__; g__; s__	2e-21
New.ReferenceOTU11383	NA	NA	NA	6.87473	4.5054	0.0164412		k__Bacteria; p__Bacteroidetes; c__Flavobacteriia; o__Flavobacteriales; f__; g__; s__	5e-22
New.ReferenceOTU5739	NA	NA	NA	3.87645	4.55174	0.02075		k__Bacteria; p__Bacteroidetes; c__Flavobacteriia; o__Flavobacteriales; f__; g__; s__	3e-23
New.ReferenceOTU13665	NA	NA	NA	1.38636	4.26244	0.0292609		k__Bacteria; p__Bacteroidetes; c__Flavobacteriia; o__Flavobacteriales; f__; g__; s__	3e-17
New.ReferenceOTU18976	NA	NA	NA	2.44395	4.28177	0.0328502		k__Bacteria; p__Bacteroidetes; c__Flavobacteriia; o__Flavobacteriales; f__; g__; s__	1e-22
New.ReferenceOTU22040	NA	NA	NA	3.84641	4.1403	0.0428185		k__Bacteria; p__Bacteroidetes; c__Flavobacteriia; o__Flavobacteriales; f__; g__; s__	9e-27
4429409	155.187	6.78818	3.34e-11	NA	NA	NA		k__Bacteria; p__Bacteroidetes; c__Flavobacteriia; o__Flavobacteriales; f__; g__; s__	6e-34
New.ReferenceOTU21317	14.9594	5.9164	0.00039378	NA	NA	NA		k__Bacteria; p__Bacteroidetes; c__Flavobacteriia; o__Flavobacteriales; f__; g__; s__	3e-17
New.ReferenceOTU8285	1.78626	5.44184	0.00368845	NA	NA	NA		k__Bacteria; p__Bacteroidetes; c__Flavobacteriia; o__Flavobacteriales; f__; g__; s__	1e-12
New.ReferenceOTU33680	5.3714	4.92419	0.0182613	NA	NA	NA		k__Bacteria; p__Bacteroidetes; c__Flavobacteriia; o__Flavobacteriales; f__; g__; s__	9e-27
New.ReferenceOTU10406	12.329	4.29251	0.0193063	NA	NA	NA		k__Bacteria; p__Bacteroidetes; c__Flavobacteriia; o__Flavobacteriales; f__; g__; s__	7e-24
New.ReferenceOTU35143	0.297522	4.27686	0.0392134	NA	NA	NA		k__Bacteria; p__Bacteroidetes; c__Flavobacteriia; o__Flavobacteriales; f__; g__; s__	8e-21
New.ReferenceOTU29822	NA	NA	NA	4.33927	4.94702	0.00914122		k__Bacteria; p__Bacteroidetes; c__Flavobacteriia; o__Flavobacteriales; f__[Weeksellaceae]; g__; s__	3e-13
New.ReferenceOTU31008	NA	NA	NA	1.1713	4.13969	0.0348779		k__Bacteria; p__Bacteroidetes; c__Flavobacteriia; o__Flavobacteriales; f__[Weeksellaceae]; g__; s__	8e-24
599729	18.1952	7.5516	7.68e-10	NA	NA	NA		k__Bacteria; p__Bacteroidetes; c__Flavobacteriia; o__Flavobacteriales; f__[Weeksellaceae]; g__; s__	6e-34
New.ReferenceOTU33905	17.96	2.66768	0.0103814	NA	NA	NA		k__Bacteria; p__Bacteroidetes; c__Flavobacteriia; o__Flavobacteriales; f__[Weeksellaceae]; g__; s__	8e-21
New.ReferenceOTU5351	4.00886	4.81186	0.0199191	NA	NA	NA		k__Bacteria; p__Bacteroidetes; c__Flavobacteriia; o__Flavobacteriales; f__[Weeksellaceae]; g__; s__	4e-10
4395986	22.741	-3.09342	0.00339797	NA	NA	NA		k__Bacteria; p__Bacteroidetes; c__Flavobacteriia; o__Flavobacteriales; f__[Weeksellaceae]; g__Chryseobacterium; s__	6e-34
4414692	16.76	-2.49813	0.0241876	NA	NA	NA		k__Bacteria; p__Bacteroidetes; c__Flavobacteriia; o__Flavobacteriales; f__[Weeksellaceae]; g__Chryseobacterium; s__	6e-34
3692330	NA	NA	NA	356.04	4.73635	0.0173433		k__Bacteria; p__Bacteroidetes; c__Flavobacteriia; o__Flavobacteriales; f__[Weeksellaceae]; g__Cloacibacterium; s__	1e-31
New.ReferenceOTU18625	340.239	5.24006	5.38e-11	NA	NA	NA		k__Bacteria; p__Bacteroidetes; c__Flavobacteriia; o__Flavobacteriales; f__[Weeksellaceae]; g__Ornithobacterium; s__	6e-28
547181	0.716094	-5.30366	0.0120087	NA	NA	NA		k__Bacteria; p__Bacteroidetes; c__Flavobacteriia; o__Flavobacteriales; f__[Weeksellaceae]; g__Wautersiella; s__	6e-34
346398	NA	NA	NA	370.366	5.40584	0.000227857		k__Bacteria; p__Bacteroidetes; c__Flavobacteriia; o__Flavobacteriales; f__Cryomorphaceae; g__; s__	1e-31
722158	NA	NA	NA	39.1089	5.79584	0.00127964		k__Bacteria; p__Bacteroidetes; c__Flavobacteriia; o__Flavobacteriales; f__Cryomorphaceae; g__; s__	4e-35
New.ReferenceOTU29736	NA	NA	NA	10.2238	5.15099	0.00732945		k__Bacteria; p__Bacteroidetes; c__Flavobacteriia; o__Flavobacteriales; f__Cryomorphaceae; g__; s__	3e-17
608453	NA	NA	NA	6.12743	4.65755	0.00814344		k__Bacteria; p__Bacteroidetes; c__Flavobacteriia; o__Flavobacteriales; f__Cryomorphaceae; g__; s__	1e-31
New.ReferenceOTU21220	NA	NA	NA	6.13263	4.91648	0.0109152		k__Bacteria; p__Bacteroidetes; c__Flavobacteriia; o__Flavobacteriales; f__Cryomorphaceae; g__; s__	3e-17
New.ReferenceOTU17	NA	NA	NA	7.40004	4.89972	0.0117135		k__Bacteria; p__Bacteroidetes; c__Flavobacteriia; o__Flavobacteriales; f__Cryomorphaceae; g__; s__	8e-21
822935	NA	NA	NA	77.2549	3.8014	0.0131893		k__Bacteria; p__Bacteroidetes; c__Flavobacteriia; o__Flavobacteriales; f__Cryomorphaceae; g__; s__	6e-34
New.ReferenceOTU9672	NA	NA	NA	70.4054	2.64171	0.0219664		k__Bacteria; p__Bacteroidetes; c__Flavobacteriia; o__Flavobacteriales; f__Cryomorphaceae; g__; s__	9e-27
New.ReferenceOTU8102	NA	NA	NA	2.83971	4.45114	0.0236848		k__Bacteria; p__Bacteroidetes; c__Flavobacteriia; o__Flavobacteriales; f__Cryomorphaceae; g__; s__	3e-17
New.ReferenceOTU31628	NA	NA	NA	12.0851	4.075	0.0382354		k__Bacteria; p__Bacteroidetes; c__Flavobacteriia; o__Flavobacteriales; f__Cryomorphaceae; g__; s__	8e-21
2563205	NA	NA	NA	110.682	2.79406	0.039465		k__Bacteria; p__Bacteroidetes; c__Flavobacteriia; o__Flavobacteriales; f__Cryomorphaceae; g__; s__	1e-31
New.ReferenceOTU12507	NA	NA	NA	5.98658	4.20374	0.0402277		k__Bacteria; p__Bacteroidetes; c__Flavobacteriia; o__Flavobacteriales; f__Cryomorphaceae; g__; s__	8e-21
138877	NA	NA	NA	86.6055	3.19262	0.0404289		k__Bacteria; p__Bacteroidetes; c__Flavobacteriia; o__Flavobacteriales; f__Cryomorphaceae; g__; s__	6e-34
269559	NA	NA	NA	1.07995	4.03375	0.0413663		k__Bacteria; p__Bacteroidetes; c__Flavobacteriia; o__Flavobacteriales; f__Cryomorphaceae; g__; s__	1e-31
New.ReferenceOTU24389	NA	NA	NA	6.23574	4.14531	0.0442089		k__Bacteria; p__Bacteroidetes; c__Flavobacteriia; o__Flavobacteriales; f__Cryomorphaceae; g__; s__	5e-22
New.ReferenceOTU18060	NA	NA	NA	1.59059	4.02852	0.0460271		k__Bacteria; p__Bacteroidetes; c__Flavobacteriia; o__Flavobacteriales; f__Cryomorphaceae; g__; s__	6e-28
4463492	4.4908	4.86043	0.000115901	NA	NA	NA		k__Bacteria; p__Bacteroidetes; c__Flavobacteriia; o__Flavobacteriales; f__Cryomorphaceae; g__; s__	6e-34
341071	1.33921	5.11268	0.00965604	NA	NA	NA		k__Bacteria; p__Bacteroidetes; c__Flavobacteriia; o__Flavobacteriales; f__Cryomorphaceae; g__; s__	6e-34
709642	1.9214	-4.90874	0.0189344	NA	NA	NA		k__Bacteria; p__Bacteroidetes; c__Flavobacteriia; o__Flavobacteriales; f__Cryomorphaceae; g__; s__	6e-34
4314534	1.18743	4.49668	0.0347026	NA	NA	NA		k__Bacteria; p__Bacteroidetes; c__Flavobacteriia; o__Flavobacteriales; f__Cryomorphaceae; g__; s__	1e-31
806964	76.3046	5.85537	6.04e-09	NA	NA	NA		k__Bacteria; p__Bacteroidetes; c__Flavobacteriia; o__Flavobacteriales; f__Cryomorphaceae; g__Crocinitomix; s__	6e-34
589627	NA	NA	NA	26.0528	5.94163	0.000397518		k__Bacteria; p__Bacteroidetes; c__Flavobacteriia; o__Flavobacteriales; f__Cryomorphaceae; g__Cryomorpha; s__	9e-33
New.ReferenceOTU22958	NA	NA	NA	4.77622	4.72241	0.0155017		k__Bacteria; p__Bacteroidetes; c__Flavobacteriia; o__Flavobacteriales; f__Cryomorphaceae; g__Cryomorpha; s__	1e-31
New.ReferenceOTU23419	NA	NA	NA	178.599	6.7986	1.03e-06		k__Bacteria; p__Bacteroidetes; c__Flavobacteriia; o__Flavobacteriales; f__Cryomorphaceae; g__Fluviicola; s__	6e-28
New.ReferenceOTU37210	NA	NA	NA	147.825	6.21998	7.17e-06		k__Bacteria; p__Bacteroidetes; c__Flavobacteriia; o__Flavobacteriales; f__Cryomorphaceae; g__Fluviicola; s__	9e-27
New.ReferenceOTU28463	NA	NA	NA	35.1634	5.18614	0.000238838		k__Bacteria; p__Bacteroidetes; c__Flavobacteriia; o__Flavobacteriales; f__Cryomorphaceae; g__Fluviicola; s__	2e-24
New.ReferenceOTU884	NA	NA	NA	11.5904	6.09793	0.000476119		k__Bacteria; p__Bacteroidetes; c__Flavobacteriia; o__Flavobacteriales; f__Cryomorphaceae; g__Fluviicola; s__	2e-27
New.ReferenceOTU11644	NA	NA	NA	20.3083	4.97437	0.00227255		k__Bacteria; p__Bacteroidetes; c__Flavobacteriia; o__Flavobacteriales; f__Cryomorphaceae; g__Fluviicola; s__	3e-26
809478	NA	NA	NA	23.8321	4.9754	0.00647349		k__Bacteria; p__Bacteroidetes; c__Flavobacteriia; o__Flavobacteriales; f__Cryomorphaceae; g__Fluviicola; s__	6e-34
New.ReferenceOTU37446	NA	NA	NA	6.28035	4.97008	0.009663		k__Bacteria; p__Bacteroidetes; c__Flavobacteriia; o__Flavobacteriales; f__Cryomorphaceae; g__Fluviicola; s__	2e-24
New.ReferenceOTU1799	NA	NA	NA	9.23172	5.00878	0.009663		k__Bacteria; p__Bacteroidetes; c__Flavobacteriia; o__Flavobacteriales; f__Cryomorphaceae; g__Fluviicola; s__	2e-24
New.ReferenceOTU10892	NA	NA	NA	6.20579	4.66182	0.00997909		k__Bacteria; p__Bacteroidetes; c__Flavobacteriia; o__Flavobacteriales; f__Cryomorphaceae; g__Fluviicola; s__	3e-26
New.ReferenceOTU29404	NA	NA	NA	5.43606	4.72191	0.0157578		k__Bacteria; p__Bacteroidetes; c__Flavobacteriia; o__Flavobacteriales; f__Cryomorphaceae; g__Fluviicola; s__	1e-25
New.ReferenceOTU36503	NA	NA	NA	6.5458	4.20998	0.0159499		k__Bacteria; p__Bacteroidetes; c__Flavobacteriia; o__Flavobacteriales; f__Cryomorphaceae; g__Fluviicola; s__	3e-23
New.ReferenceOTU28620	NA	NA	NA	6.65247	4.19164	0.0173097		k__Bacteria; p__Bacteroidetes; c__Flavobacteriia; o__Flavobacteriales; f__Cryomorphaceae; g__Fluviicola; s__	1e-25
New.ReferenceOTU24069	NA	NA	NA	3.20262	4.46381	0.0236848		k__Bacteria; p__Bacteroidetes; c__Flavobacteriia; o__Flavobacteriales; f__Cryomorphaceae; g__Fluviicola; s__	9e-27
1109744	NA	NA	NA	11.0027	4.33948	0.0343856		k__Bacteria; p__Bacteroidetes; c__Flavobacteriia; o__Flavobacteriales; f__Cryomorphaceae; g__Fluviicola; s__	6e-34
New.ReferenceOTU3718	NA	NA	NA	1.74532	4.16743	0.0369784		k__Bacteria; p__Bacteroidetes; c__Flavobacteriia; o__Flavobacteriales; f__Cryomorphaceae; g__Fluviicola; s__	1e-25
New.ReferenceOTU23090	NA	NA	NA	1.77403	4.13705	0.0393338		k__Bacteria; p__Bacteroidetes; c__Flavobacteriia; o__Flavobacteriales; f__Cryomorphaceae; g__Fluviicola; s__	2e-18
New.ReferenceOTU36394	NA	NA	NA	15.3517	4.11214	0.0395862		k__Bacteria; p__Bacteroidetes; c__Flavobacteriia; o__Flavobacteriales; f__Cryomorphaceae; g__Fluviicola; s__	2e-24
New.ReferenceOTU16423	NA	NA	NA	7.3813	4.19106	0.041445		k__Bacteria; p__Bacteroidetes; c__Flavobacteriia; o__Flavobacteriales; f__Cryomorphaceae; g__Fluviicola; s__	3e-26
New.ReferenceOTU27460	NA	NA	NA	2.09289	4.06986	0.0450029		k__Bacteria; p__Bacteroidetes; c__Flavobacteriia; o__Flavobacteriales; f__Cryomorphaceae; g__Fluviicola; s__	2e-24
New.ReferenceOTU5073	NA	NA	NA	5.15105	4.10682	0.0463307		k__Bacteria; p__Bacteroidetes; c__Flavobacteriia; o__Flavobacteriales; f__Cryomorphaceae; g__Fluviicola; s__	1e-25
New.ReferenceOTU6962	NA	NA	NA	8.27988	3.89709	0.048841		k__Bacteria; p__Bacteroidetes; c__Flavobacteriia; o__Flavobacteriales; f__Cryomorphaceae; g__Fluviicola; s__	2e-24
277616	7.62314	4.02165	0.00149193	NA	NA	NA		k__Bacteria; p__Bacteroidetes; c__Flavobacteriia; o__Flavobacteriales; f__Cryomorphaceae; g__Fluviicola; s__	6e-34
185297	NA	NA	NA	57.1503	2.46636	0.0369784		k__Bacteria; p__Bacteroidetes; c__Flavobacteriia; o__Flavobacteriales; f__Flavobacteriaceae; g__; s__	1e-31
1139304	NA	NA	NA	126.053	7.47361	8.65e-08		k__Bacteria; p__Bacteroidetes; c__Flavobacteriia; o__Flavobacteriales; f__Flavobacteriaceae; g__; s__	6e-34
New.ReferenceOTU19444	NA	NA	NA	39.5278	6.42242	3.37e-07		k__Bacteria; p__Bacteroidetes; c__Flavobacteriia; o__Flavobacteriales; f__Flavobacteriaceae; g__; s__	9e-27
4453876	NA	NA	NA	29.3755	7.34461	3.61e-06		k__Bacteria; p__Bacteroidetes; c__Flavobacteriia; o__Flavobacteriales; f__Flavobacteriaceae; g__; s__	1e-31
New.ReferenceOTU30291	NA	NA	NA	20.1334	5.82408	5.93e-06		k__Bacteria; p__Bacteroidetes; c__Flavobacteriia; o__Flavobacteriales; f__Flavobacteriaceae; g__; s__	9e-27
New.ReferenceOTU36327	NA	NA	NA	37.8651	6.50049	8.45e-06		k__Bacteria; p__Bacteroidetes; c__Flavobacteriia; o__Flavobacteriales; f__Flavobacteriaceae; g__; s__	9e-27
New.ReferenceOTU14313	NA	NA	NA	35.9302	6.45602	9.05e-06		k__Bacteria; p__Bacteroidetes; c__Flavobacteriia; o__Flavobacteriales; f__Flavobacteriaceae; g__; s__	9e-27
New.ReferenceOTU30761	NA	NA	NA	16.173	6.93043	1.24e-05		k__Bacteria; p__Bacteroidetes; c__Flavobacteriia; o__Flavobacteriales; f__Flavobacteriaceae; g__; s__	2e-24
4349748	NA	NA	NA	22.5886	5.42156	3.73e-05		k__Bacteria; p__Bacteroidetes; c__Flavobacteriia; o__Flavobacteriales; f__Flavobacteriaceae; g__; s__	4e-29
4419566	NA	NA	NA	2326.09	3.89282	3.75e-05		k__Bacteria; p__Bacteroidetes; c__Flavobacteriia; o__Flavobacteriales; f__Flavobacteriaceae; g__; s__	6e-34
4475224	NA	NA	NA	59.1619	5.08143	4.03e-05		k__Bacteria; p__Bacteroidetes; c__Flavobacteriia; o__Flavobacteriales; f__Flavobacteriaceae; g__; s__	6e-34
New.ReferenceOTU32486	NA	NA	NA	14.6426	6.64325	5.43e-05		k__Bacteria; p__Bacteroidetes; c__Flavobacteriia; o__Flavobacteriales; f__Flavobacteriaceae; g__; s__	1e-10
New.ReferenceOTU14486	NA	NA	NA	10.1471	6.47096	7.18e-05		k__Bacteria; p__Bacteroidetes; c__Flavobacteriia; o__Flavobacteriales; f__Flavobacteriaceae; g__; s__	3e-26
New.ReferenceOTU1408	NA	NA	NA	11.3492	6.47143	8.61e-05		k__Bacteria; p__Bacteroidetes; c__Flavobacteriia; o__Flavobacteriales; f__Flavobacteriaceae; g__; s__	2e-24
544407	NA	NA	NA	19.3265	6.60952	8.61e-05		k__Bacteria; p__Bacteroidetes; c__Flavobacteriia; o__Flavobacteriales; f__Flavobacteriaceae; g__; s__	4e-29
New.ReferenceOTU19197	NA	NA	NA	29.8006	-6.60312	9.93e-05		k__Bacteria; p__Bacteroidetes; c__Flavobacteriia; o__Flavobacteriales; f__Flavobacteriaceae; g__; s__	1e-16
New.ReferenceOTU37239	NA	NA	NA	15.6816	6.47741	0.000125956		k__Bacteria; p__Bacteroidetes; c__Flavobacteriia; o__Flavobacteriales; f__Flavobacteriaceae; g__; s__	5e-22
New.ReferenceOTU36731	NA	NA	NA	8.83573	5.49622	0.000312852		k__Bacteria; p__Bacteroidetes; c__Flavobacteriia; o__Flavobacteriales; f__Flavobacteriaceae; g__; s__	2e-20
New.ReferenceOTU8472	NA	NA	NA	11.1964	6.16305	0.000363015		k__Bacteria; p__Bacteroidetes; c__Flavobacteriia; o__Flavobacteriales; f__Flavobacteriaceae; g__; s__	3e-26
New.ReferenceOTU26020	NA	NA	NA	13.8499	5.21435	0.000367834		k__Bacteria; p__Bacteroidetes; c__Flavobacteriia; o__Flavobacteriales; f__Flavobacteriaceae; g__; s__	9e-27
New.ReferenceOTU20337	NA	NA	NA	20.3545	5.39852	0.000391674		k__Bacteria; p__Bacteroidetes; c__Flavobacteriia; o__Flavobacteriales; f__Flavobacteriaceae; g__; s__	9e-27
255704	NA	NA	NA	5.63965	5.93851	0.000404813		k__Bacteria; p__Bacteroidetes; c__Flavobacteriia; o__Flavobacteriales; f__Flavobacteriaceae; g__; s__	1e-31
4362546	NA	NA	NA	74.8691	4.23571	0.000490119		k__Bacteria; p__Bacteroidetes; c__Flavobacteriia; o__Flavobacteriales; f__Flavobacteriaceae; g__; s__	6e-34
New.ReferenceOTU774	NA	NA	NA	12.2936	5.63196	0.000655459		k__Bacteria; p__Bacteroidetes; c__Flavobacteriia; o__Flavobacteriales; f__Flavobacteriaceae; g__; s__	9e-27
New.ReferenceOTU22432	NA	NA	NA	14.1399	5.60382	0.000754571		k__Bacteria; p__Bacteroidetes; c__Flavobacteriia; o__Flavobacteriales; f__Flavobacteriaceae; g__; s__	1e-19
New.ReferenceOTU3027	NA	NA	NA	3.5982	5.61957	0.000909436		k__Bacteria; p__Bacteroidetes; c__Flavobacteriia; o__Flavobacteriales; f__Flavobacteriaceae; g__; s__	2e-24
4445601	NA	NA	NA	148.414	4.09905	0.000938613		k__Bacteria; p__Bacteroidetes; c__Flavobacteriia; o__Flavobacteriales; f__Flavobacteriaceae; g__; s__	6e-34
New.ReferenceOTU28737	NA	NA	NA	52.9965	6.04762	0.00102445		k__Bacteria; p__Bacteroidetes; c__Flavobacteriia; o__Flavobacteriales; f__Flavobacteriaceae; g__; s__	9e-27
4422003	NA	NA	NA	5.63037	5.62564	0.00143666		k__Bacteria; p__Bacteroidetes; c__Flavobacteriia; o__Flavobacteriales; f__Flavobacteriaceae; g__; s__	1e-31
New.ReferenceOTU1559	NA	NA	NA	5.66114	5.58879	0.00162045		k__Bacteria; p__Bacteroidetes; c__Flavobacteriia; o__Flavobacteriales; f__Flavobacteriaceae; g__; s__	2e-24
New.ReferenceOTU4085	NA	NA	NA	18.3025	5.08282	0.00168111		k__Bacteria; p__Bacteroidetes; c__Flavobacteriia; o__Flavobacteriales; f__Flavobacteriaceae; g__; s__	9e-27
New.ReferenceOTU35411	NA	NA	NA	6.6824	5.58814	0.00184823		k__Bacteria; p__Bacteroidetes; c__Flavobacteriia; o__Flavobacteriales; f__Flavobacteriaceae; g__; s__	9e-27
New.ReferenceOTU16001	NA	NA	NA	3.67444	4.73868	0.00193918		k__Bacteria; p__Bacteroidetes; c__Flavobacteriia; o__Flavobacteriales; f__Flavobacteriaceae; g__; s__	2e-24
New.ReferenceOTU29855	NA	NA	NA	6.24378	5.563	0.00193918		k__Bacteria; p__Bacteroidetes; c__Flavobacteriia; o__Flavobacteriales; f__Flavobacteriaceae; g__; s__	2e-24
New.ReferenceOTU7851	NA	NA	NA	11.5219	4.96603	0.00193918		k__Bacteria; p__Bacteroidetes; c__Flavobacteriia; o__Flavobacteriales; f__Flavobacteriaceae; g__; s__	9e-27
New.ReferenceOTU32860	NA	NA	NA	6.28016	5.50447	0.00232447		k__Bacteria; p__Bacteroidetes; c__Flavobacteriia; o__Flavobacteriales; f__Flavobacteriaceae; g__; s__	9e-27
New.ReferenceOTU8274	NA	NA	NA	4.11351	5.35737	0.00276346		k__Bacteria; p__Bacteroidetes; c__Flavobacteriia; o__Flavobacteriales; f__Flavobacteriaceae; g__; s__	9e-27
107130	NA	NA	NA	2.67307	5.23633	0.00281042		k__Bacteria; p__Bacteroidetes; c__Flavobacteriia; o__Flavobacteriales; f__Flavobacteriaceae; g__; s__	4e-29
907288	NA	NA	NA	539.96	3.77887	0.00285493		k__Bacteria; p__Bacteroidetes; c__Flavobacteriia; o__Flavobacteriales; f__Flavobacteriaceae; g__; s__	6e-34
102274	NA	NA	NA	149.167	4.35483	0.00286968		k__Bacteria; p__Bacteroidetes; c__Flavobacteriia; o__Flavobacteriales; f__Flavobacteriaceae; g__; s__	6e-34
521453	NA	NA	NA	7.64514	5.01404	0.0029885		k__Bacteria; p__Bacteroidetes; c__Flavobacteriia; o__Flavobacteriales; f__Flavobacteriaceae; g__; s__	1e-31
263652	NA	NA	NA	4.28958	5.30921	0.00332598		k__Bacteria; p__Bacteroidetes; c__Flavobacteriia; o__Flavobacteriales; f__Flavobacteriaceae; g__; s__	4e-29
147529	NA	NA	NA	771.86	4.46535	0.00332598		k__Bacteria; p__Bacteroidetes; c__Flavobacteriia; o__Flavobacteriales; f__Flavobacteriaceae; g__; s__	6e-34
New.ReferenceOTU2420	NA	NA	NA	7.36823	4.95113	0.00354194		k__Bacteria; p__Bacteroidetes; c__Flavobacteriia; o__Flavobacteriales; f__Flavobacteriaceae; g__; s__	2e-24
New.ReferenceOTU16619	NA	NA	NA	3.93097	5.22928	0.0040106		k__Bacteria; p__Bacteroidetes; c__Flavobacteriia; o__Flavobacteriales; f__Flavobacteriaceae; g__; s__	1e-18
588999	NA	NA	NA	17.2963	4.87845	0.0044642		k__Bacteria; p__Bacteroidetes; c__Flavobacteriia; o__Flavobacteriales; f__Flavobacteriaceae; g__; s__	4e-29
4398600	NA	NA	NA	3.09039	5.10714	0.00497529		k__Bacteria; p__Bacteroidetes; c__Flavobacteriia; o__Flavobacteriales; f__Flavobacteriaceae; g__; s__	6e-34
548650	NA	NA	NA	5.88981	4.75948	0.00513831		k__Bacteria; p__Bacteroidetes; c__Flavobacteriia; o__Flavobacteriales; f__Flavobacteriaceae; g__; s__	4e-29
New.ReferenceOTU10517	NA	NA	NA	3.03925	5.07539	0.00532311		k__Bacteria; p__Bacteroidetes; c__Flavobacteriia; o__Flavobacteriales; f__Flavobacteriaceae; g__; s__	9e-27
New.ReferenceOTU16284	NA	NA	NA	5.34558	5.14852	0.00604184		k__Bacteria; p__Bacteroidetes; c__Flavobacteriia; o__Flavobacteriales; f__Flavobacteriaceae; g__; s__	9e-27
New.ReferenceOTU19739	NA	NA	NA	7.8444	4.6047	0.00617104		k__Bacteria; p__Bacteroidetes; c__Flavobacteriia; o__Flavobacteriales; f__Flavobacteriaceae; g__; s__	8e-21
New.ReferenceOTU11898	NA	NA	NA	2.92444	5.01881	0.00617537		k__Bacteria; p__Bacteroidetes; c__Flavobacteriia; o__Flavobacteriales; f__Flavobacteriaceae; g__; s__	6e-21
New.ReferenceOTU21253	NA	NA	NA	1.96411	4.86912	0.00736805		k__Bacteria; p__Bacteroidetes; c__Flavobacteriia; o__Flavobacteriales; f__Flavobacteriaceae; g__; s__	2e-20
4325239	NA	NA	NA	4.48682	5.029	0.00749037		k__Bacteria; p__Bacteroidetes; c__Flavobacteriia; o__Flavobacteriales; f__Flavobacteriaceae; g__; s__	4e-29
2271072	NA	NA	NA	175.53	4.4846	0.00754816		k__Bacteria; p__Bacteroidetes; c__Flavobacteriia; o__Flavobacteriales; f__Flavobacteriaceae; g__; s__	6e-34
New.ReferenceOTU11625	NA	NA	NA	5.38994	4.9362	0.0100454		k__Bacteria; p__Bacteroidetes; c__Flavobacteriia; o__Flavobacteriales; f__Flavobacteriaceae; g__; s__	2e-24
New.ReferenceOTU22180	NA	NA	NA	4.04436	4.89119	0.0100836		k__Bacteria; p__Bacteroidetes; c__Flavobacteriia; o__Flavobacteriales; f__Flavobacteriaceae; g__; s__	2e-21
New.ReferenceOTU26165	NA	NA	NA	3.81517	4.87971	0.0102076		k__Bacteria; p__Bacteroidetes; c__Flavobacteriia; o__Flavobacteriales; f__Flavobacteriaceae; g__; s__	9e-27
New.ReferenceOTU24276	NA	NA	NA	2.26993	4.77095	0.0103738		k__Bacteria; p__Bacteroidetes; c__Flavobacteriia; o__Flavobacteriales; f__Flavobacteriaceae; g__; s__	5e-22
New.ReferenceOTU9439	NA	NA	NA	8.06176	4.72152	0.0107597		k__Bacteria; p__Bacteroidetes; c__Flavobacteriia; o__Flavobacteriales; f__Flavobacteriaceae; g__; s__	1e-28
109300	NA	NA	NA	2.32634	4.73509	0.0117135		k__Bacteria; p__Bacteroidetes; c__Flavobacteriia; o__Flavobacteriales; f__Flavobacteriaceae; g__; s__	1e-31
New.ReferenceOTU36074	NA	NA	NA	2.14312	4.68377	0.0126225		k__Bacteria; p__Bacteroidetes; c__Flavobacteriia; o__Flavobacteriales; f__Flavobacteriaceae; g__; s__	5e-22
4467428	NA	NA	NA	24.4678	3.92803	0.0131893		k__Bacteria; p__Bacteroidetes; c__Flavobacteriia; o__Flavobacteriales; f__Flavobacteriaceae; g__; s__	6e-34
New.ReferenceOTU16957	NA	NA	NA	1.93873	4.61966	0.0140601		k__Bacteria; p__Bacteroidetes; c__Flavobacteriia; o__Flavobacteriales; f__Flavobacteriaceae; g__; s__	5e-22
New.ReferenceOTU33237	NA	NA	NA	2.92681	4.17037	0.0159889		k__Bacteria; p__Bacteroidetes; c__Flavobacteriia; o__Flavobacteriales; f__Flavobacteriaceae; g__; s__	3e-26
New.ReferenceOTU30707	NA	NA	NA	14.9081	4.06579	0.0159983		k__Bacteria; p__Bacteroidetes; c__Flavobacteriia; o__Flavobacteriales; f__Flavobacteriaceae; g__; s__	2e-20
New.ReferenceOTU487	NA	NA	NA	2.95266	4.6297	0.0162187		k__Bacteria; p__Bacteroidetes; c__Flavobacteriia; o__Flavobacteriales; f__Flavobacteriaceae; g__; s__	9e-27
592771	NA	NA	NA	2.95772	3.76034	0.0162927		k__Bacteria; p__Bacteroidetes; c__Flavobacteriia; o__Flavobacteriales; f__Flavobacteriaceae; g__; s__	6e-34
New.ReferenceOTU22083	NA	NA	NA	3.23114	4.14778	0.0163844		k__Bacteria; p__Bacteroidetes; c__Flavobacteriia; o__Flavobacteriales; f__Flavobacteriaceae; g__; s__	9e-27
New.ReferenceOTU36125	NA	NA	NA	2.94661	4.62279	0.0164412		k__Bacteria; p__Bacteroidetes; c__Flavobacteriia; o__Flavobacteriales; f__Flavobacteriaceae; g__; s__	2e-24
New.ReferenceOTU36835	NA	NA	NA	3.33205	4.61705	0.0173736		k__Bacteria; p__Bacteroidetes; c__Flavobacteriia; o__Flavobacteriales; f__Flavobacteriaceae; g__; s__	2e-18
New.ReferenceOTU1306	NA	NA	NA	3.12655	4.60623	0.0175045		k__Bacteria; p__Bacteroidetes; c__Flavobacteriia; o__Flavobacteriales; f__Flavobacteriaceae; g__; s__	4e-16
4314827	NA	NA	NA	3.30874	3.48081	0.0194159		k__Bacteria; p__Bacteroidetes; c__Flavobacteriia; o__Flavobacteriales; f__Flavobacteriaceae; g__; s__	6e-34
New.ReferenceOTU34945	NA	NA	NA	1.69401	4.44548	0.0205398		k__Bacteria; p__Bacteroidetes; c__Flavobacteriia; o__Flavobacteriales; f__Flavobacteriaceae; g__; s__	1e-19
New.ReferenceOTU22961	NA	NA	NA	1.69388	4.40861	0.0218192		k__Bacteria; p__Bacteroidetes; c__Flavobacteriia; o__Flavobacteriales; f__Flavobacteriaceae; g__; s__	9e-27
New.ReferenceOTU22711	NA	NA	NA	2.98048	4.49603	0.0218192		k__Bacteria; p__Bacteroidetes; c__Flavobacteriia; o__Flavobacteriales; f__Flavobacteriaceae; g__; s__	9e-27
New.ReferenceOTU1099	NA	NA	NA	26.9263	3.93742	0.0219664		k__Bacteria; p__Bacteroidetes; c__Flavobacteriia; o__Flavobacteriales; f__Flavobacteriaceae; g__; s__	3e-17
112904	NA	NA	NA	59.4943	3.15707	0.0219664		k__Bacteria; p__Bacteroidetes; c__Flavobacteriia; o__Flavobacteriales; f__Flavobacteriaceae; g__; s__	6e-34
New.ReferenceOTU18764	NA	NA	NA	2.20277	4.44946	0.0219764		k__Bacteria; p__Bacteroidetes; c__Flavobacteriia; o__Flavobacteriales; f__Flavobacteriaceae; g__; s__	9e-27
New.ReferenceOTU16058	NA	NA	NA	2.1276	4.4243	0.0230302		k__Bacteria; p__Bacteroidetes; c__Flavobacteriia; o__Flavobacteriales; f__Flavobacteriaceae; g__; s__	5e-22
New.ReferenceOTU29594	NA	NA	NA	2.68047	4.45731	0.0230302		k__Bacteria; p__Bacteroidetes; c__Flavobacteriia; o__Flavobacteriales; f__Flavobacteriaceae; g__; s__	2e-18
New.ReferenceOTU2351	NA	NA	NA	2.61467	4.44268	0.0236848		k__Bacteria; p__Bacteroidetes; c__Flavobacteriia; o__Flavobacteriales; f__Flavobacteriaceae; g__; s__	8e-21
New.ReferenceOTU18313	NA	NA	NA	14.6758	4.3314	0.0237469		k__Bacteria; p__Bacteroidetes; c__Flavobacteriia; o__Flavobacteriales; f__Flavobacteriaceae; g__; s__	5e-16
New.ReferenceOTU25934	NA	NA	NA	2.26181	4.41551	0.0238806		k__Bacteria; p__Bacteroidetes; c__Flavobacteriia; o__Flavobacteriales; f__Flavobacteriaceae; g__; s__	8e-21
235391	NA	NA	NA	71.8257	3.85789	0.0255592		k__Bacteria; p__Bacteroidetes; c__Flavobacteriia; o__Flavobacteriales; f__Flavobacteriaceae; g__; s__	4e-29
New.ReferenceOTU21135	NA	NA	NA	5.01682	4.15372	0.0287413		k__Bacteria; p__Bacteroidetes; c__Flavobacteriia; o__Flavobacteriales; f__Flavobacteriaceae; g__; s__	2e-24
New.ReferenceOTU2673	NA	NA	NA	1.41435	4.26036	0.0292609		k__Bacteria; p__Bacteroidetes; c__Flavobacteriia; o__Flavobacteriales; f__Flavobacteriaceae; g__; s__	2e-24
New.ReferenceOTU14522	NA	NA	NA	1.40197	4.22138	0.0312976		k__Bacteria; p__Bacteroidetes; c__Flavobacteriia; o__Flavobacteriales; f__Flavobacteriaceae; g__; s__	1e-19
148990	NA	NA	NA	1.23245	4.17842	0.0335376		k__Bacteria; p__Bacteroidetes; c__Flavobacteriia; o__Flavobacteriales; f__Flavobacteriaceae; g__; s__	1e-31
113251	NA	NA	NA	1.78103	4.22357	0.0337817		k__Bacteria; p__Bacteroidetes; c__Flavobacteriia; o__Flavobacteriales; f__Flavobacteriaceae; g__; s__	1e-31
New.ReferenceOTU7501	NA	NA	NA	1.72451	4.2137	0.0341495		k__Bacteria; p__Bacteroidetes; c__Flavobacteriia; o__Flavobacteriales; f__Flavobacteriaceae; g__; s__	2e-24
New.ReferenceOTU34645	NA	NA	NA	44.9888	4.26202	0.0343856		k__Bacteria; p__Bacteroidetes; c__Flavobacteriia; o__Flavobacteriales; f__Flavobacteriaceae; g__; s__	3e-23
1108367	NA	NA	NA	1.8106	3.62951	0.0351283		k__Bacteria; p__Bacteroidetes; c__Flavobacteriia; o__Flavobacteriales; f__Flavobacteriaceae; g__; s__	6e-34
New.ReferenceOTU1068	NA	NA	NA	3.10597	3.6872	0.0366063		k__Bacteria; p__Bacteroidetes; c__Flavobacteriia; o__Flavobacteriales; f__Flavobacteriaceae; g__; s__	4e-16
1792747	NA	NA	NA	1.65917	4.16127	0.0369784		k__Bacteria; p__Bacteroidetes; c__Flavobacteriia; o__Flavobacteriales; f__Flavobacteriaceae; g__; s__	6e-34
New.ReferenceOTU6761	NA	NA	NA	8.3203	4.28084	0.0369784		k__Bacteria; p__Bacteroidetes; c__Flavobacteriia; o__Flavobacteriales; f__Flavobacteriaceae; g__; s__	5e-16
New.ReferenceOTU34678	NA	NA	NA	1.967	4.17453	0.0372077		k__Bacteria; p__Bacteroidetes; c__Flavobacteriia; o__Flavobacteriales; f__Flavobacteriaceae; g__; s__	2e-24
New.ReferenceOTU2139	NA	NA	NA	2.55705	3.42582	0.0372077		k__Bacteria; p__Bacteroidetes; c__Flavobacteriia; o__Flavobacteriales; f__Flavobacteriaceae; g__; s__	9e-27
812759	NA	NA	NA	1.03108	4.08512	0.037315		k__Bacteria; p__Bacteroidetes; c__Flavobacteriia; o__Flavobacteriales; f__Flavobacteriaceae; g__; s__	1e-31
299765	NA	NA	NA	1.83291	4.16224	0.037315		k__Bacteria; p__Bacteroidetes; c__Flavobacteriia; o__Flavobacteriales; f__Flavobacteriaceae; g__; s__	6e-34
New.ReferenceOTU27675	NA	NA	NA	2.05427	4.17856	0.037315		k__Bacteria; p__Bacteroidetes; c__Flavobacteriia; o__Flavobacteriales; f__Flavobacteriaceae; g__; s__	2e-24
New.ReferenceOTU18104	NA	NA	NA	1.70731	4.14674	0.0382354		k__Bacteria; p__Bacteroidetes; c__Flavobacteriia; o__Flavobacteriales; f__Flavobacteriaceae; g__; s__	1e-25
New.ReferenceOTU31038	NA	NA	NA	8.19633	4.04842	0.0382354		k__Bacteria; p__Bacteroidetes; c__Flavobacteriia; o__Flavobacteriales; f__Flavobacteriaceae; g__; s__	2e-24
New.ReferenceOTU26658	NA	NA	NA	1.7288	4.08579	0.04168		k__Bacteria; p__Bacteroidetes; c__Flavobacteriia; o__Flavobacteriales; f__Flavobacteriaceae; g__; s__	4e-22
New.ReferenceOTU4714	NA	NA	NA	1.45189	4.01109	0.0463307		k__Bacteria; p__Bacteroidetes; c__Flavobacteriia; o__Flavobacteriales; f__Flavobacteriaceae; g__; s__	9e-27
New.ReferenceOTU8245	NA	NA	NA	3.40033	3.81017	0.0467205		k__Bacteria; p__Bacteroidetes; c__Flavobacteriia; o__Flavobacteriales; f__Flavobacteriaceae; g__; s__	9e-27
New.ReferenceOTU7529	23.5028	5.18035	2.72e-06	NA	NA	NA		k__Bacteria; p__Bacteroidetes; c__Flavobacteriia; o__Flavobacteriales; f__Flavobacteriaceae; g__; s__	5e-25
New.ReferenceOTU31432	2.23285	5.5556	1.66e-05	NA	NA	NA		k__Bacteria; p__Bacteroidetes; c__Flavobacteriia; o__Flavobacteriales; f__Flavobacteriaceae; g__; s__	3e-23
4335535	4.11467	6.88708	2.54e-05	NA	NA	NA		k__Bacteria; p__Bacteroidetes; c__Flavobacteriia; o__Flavobacteriales; f__Flavobacteriaceae; g__; s__	1e-31
New.ReferenceOTU25888	6.1131	6.35243	0.000411379	NA	NA	NA		k__Bacteria; p__Bacteroidetes; c__Flavobacteriia; o__Flavobacteriales; f__Flavobacteriaceae; g__; s__	3e-23
270683	49.2015	4.88311	0.000723915	NA	NA	NA		k__Bacteria; p__Bacteroidetes; c__Flavobacteriia; o__Flavobacteriales; f__Flavobacteriaceae; g__; s__	6e-34
168126	7.66552	4.16695	0.00160683	NA	NA	NA		k__Bacteria; p__Bacteroidetes; c__Flavobacteriia; o__Flavobacteriales; f__Flavobacteriaceae; g__; s__	4e-29
4371082	1.73863	5.54438	0.00323373	NA	NA	NA		k__Bacteria; p__Bacteroidetes; c__Flavobacteriia; o__Flavobacteriales; f__Flavobacteriaceae; g__; s__	6e-34
4451192	3.4019	4.33796	0.00330334	NA	NA	NA		k__Bacteria; p__Bacteroidetes; c__Flavobacteriia; o__Flavobacteriales; f__Flavobacteriaceae; g__; s__	9e-33
105219	1.28787	5.37344	0.0041705	NA	NA	NA		k__Bacteria; p__Bacteroidetes; c__Flavobacteriia; o__Flavobacteriales; f__Flavobacteriaceae; g__; s__	4e-29
New.ReferenceOTU27381	6.5961	5.30096	0.00803524	NA	NA	NA		k__Bacteria; p__Bacteroidetes; c__Flavobacteriia; o__Flavobacteriales; f__Flavobacteriaceae; g__; s__	2e-12
1147464	6.85724	3.19959	0.00863316	NA	NA	NA		k__Bacteria; p__Bacteroidetes; c__Flavobacteriia; o__Flavobacteriales; f__Flavobacteriaceae; g__; s__	6e-34
New.ReferenceOTU18320	2.0821	4.23854	0.00989934	NA	NA	NA		k__Bacteria; p__Bacteroidetes; c__Flavobacteriia; o__Flavobacteriales; f__Flavobacteriaceae; g__; s__	2e-20
4404665	1.17984	3.97736	0.0157509	NA	NA	NA		k__Bacteria; p__Bacteroidetes; c__Flavobacteriia; o__Flavobacteriales; f__Flavobacteriaceae; g__; s__	6e-34
4001204	44.6367	2.46372	0.0161896	NA	NA	NA		k__Bacteria; p__Bacteroidetes; c__Flavobacteriia; o__Flavobacteriales; f__Flavobacteriaceae; g__; s__	6e-34
New.ReferenceOTU36055	0.454388	3.64599	0.0303539	NA	NA	NA		k__Bacteria; p__Bacteroidetes; c__Flavobacteriia; o__Flavobacteriales; f__Flavobacteriaceae; g__; s__	2e-27
62693	0.596374	4.49875	0.0307949	NA	NA	NA		k__Bacteria; p__Bacteroidetes; c__Flavobacteriia; o__Flavobacteriales; f__Flavobacteriaceae; g__; s__	9e-33
157660	4.95379	3.21716	0.0325864	NA	NA	NA		k__Bacteria; p__Bacteroidetes; c__Flavobacteriia; o__Flavobacteriales; f__Flavobacteriaceae; g__; s__	6e-34
1107833	2.61322	-3.66946	0.0345265	NA	NA	NA		k__Bacteria; p__Bacteroidetes; c__Flavobacteriia; o__Flavobacteriales; f__Flavobacteriaceae; g__; s__	4e-29
141336	0.757907	4.3842	0.038126	NA	NA	NA		k__Bacteria; p__Bacteroidetes; c__Flavobacteriia; o__Flavobacteriales; f__Flavobacteriaceae; g__; s__	6e-34
New.ReferenceOTU29888	4.66432	3.93152	0.0397073	NA	NA	NA		k__Bacteria; p__Bacteroidetes; c__Flavobacteriia; o__Flavobacteriales; f__Flavobacteriaceae; g__; s__	2e-18
362103	0.772447	4.34798	0.0405417	NA	NA	NA		k__Bacteria; p__Bacteroidetes; c__Flavobacteriia; o__Flavobacteriales; f__Flavobacteriaceae; g__; s__	6e-34
New.ReferenceOTU26717	0.279334	4.17467	0.04759	NA	NA	NA		k__Bacteria; p__Bacteroidetes; c__Flavobacteriia; o__Flavobacteriales; f__Flavobacteriaceae; g__; s__	2e-21
New.ReferenceOTU13446	0.947757	4.21182	0.0498004	NA	NA	NA		k__Bacteria; p__Bacteroidetes; c__Flavobacteriia; o__Flavobacteriales; f__Flavobacteriaceae; g__; s__	9e-27
New.ReferenceOTU22008	NA	NA	NA	3.26273	4.16513	0.0404289		k__Bacteria; p__Bacteroidetes; c__Flavobacteriia; o__Flavobacteriales; f__Flavobacteriaceae; g__Aequorivita; s__	9e-27
3410494	0.568483	3.76812	0.0364041	NA	NA	NA		k__Bacteria; p__Bacteroidetes; c__Flavobacteriia; o__Flavobacteriales; f__Flavobacteriaceae; g__Algibacter; s__	9e-33
1117575	1.20017	4.71361	0.0221559	NA	NA	NA		k__Bacteria; p__Bacteroidetes; c__Flavobacteriia; o__Flavobacteriales; f__Flavobacteriaceae; g__Aquimarina; s__	6e-34
New.ReferenceOTU29754	3.29037	6.13559	0.000573541	NA	NA	NA		k__Bacteria; p__Bacteroidetes; c__Flavobacteriia; o__Flavobacteriales; f__Flavobacteriaceae; g__Capnocytophaga; s__	8e-24
1145598	NA	NA	NA	158.71	6.43671	1.4e-06		k__Bacteria; p__Bacteroidetes; c__Flavobacteriia; o__Flavobacteriales; f__Flavobacteriaceae; g__Flavobacterium; s__	2e-33
1117222	NA	NA	NA	75.9392	6.49441	0.000166286		k__Bacteria; p__Bacteroidetes; c__Flavobacteriia; o__Flavobacteriales; f__Flavobacteriaceae; g__Flavobacterium; s__	2e-33
4351625	NA	NA	NA	16.1463	4.98482	0.000990327		k__Bacteria; p__Bacteroidetes; c__Flavobacteriia; o__Flavobacteriales; f__Flavobacteriaceae; g__Flavobacterium; s__	6e-31
New.ReferenceOTU34114	NA	NA	NA	3.96247	4.90016	0.00993052		k__Bacteria; p__Bacteroidetes; c__Flavobacteriia; o__Flavobacteriales; f__Flavobacteriaceae; g__Flavobacterium; s__	1e-28
New.ReferenceOTU32226	NA	NA	NA	4.21998	4.08043	0.0476472		k__Bacteria; p__Bacteroidetes; c__Flavobacteriia; o__Flavobacteriales; f__Flavobacteriaceae; g__Flavobacterium; s__	2e-18
New.ReferenceOTU33109	258.193	6.73795	1.07e-20	NA	NA	NA		k__Bacteria; p__Bacteroidetes; c__Flavobacteriia; o__Flavobacteriales; f__Flavobacteriaceae; g__Flavobacterium; s__	9e-27
New.ReferenceOTU6308	1.0084	4.59493	0.0281351	NA	NA	NA		k__Bacteria; p__Bacteroidetes; c__Flavobacteriia; o__Flavobacteriales; f__Flavobacteriaceae; g__Flavobacterium; s__	1e-12
250190	43.9215	5.98259	1.99e-06	NA	NA	NA		k__Bacteria; p__Bacteroidetes; c__Flavobacteriia; o__Flavobacteriales; f__Flavobacteriaceae; g__Kordia; s__	1e-31
636147	NA	NA	NA	6.419	3.24474	0.0173736		k__Bacteria; p__Bacteroidetes; c__Flavobacteriia; o__Flavobacteriales; f__Flavobacteriaceae; g__Mesonia; s__	6e-34
1128468	NA	NA	NA	3.76205	4.16548	0.0244367		k__Bacteria; p__Bacteroidetes; c__Flavobacteriia; o__Flavobacteriales; f__Flavobacteriaceae; g__Mesonia; s__	6e-34
279006	1.14642	4.27938	0.0483928	NA	NA	NA		k__Bacteria; p__Bacteroidetes; c__Flavobacteriia; o__Flavobacteriales; f__Flavobacteriaceae; g__Olleya; s__	6e-34
New.ReferenceOTU11430	NA	NA	NA	9.71606	5.64549	0.000282023		k__Bacteria; p__Bacteroidetes; c__Flavobacteriia; o__Flavobacteriales; f__Flavobacteriaceae; g__Polaribacter; s__	5e-22
New.ReferenceOTU185	NA	NA	NA	86.1059	5.33818	0.000688606		k__Bacteria; p__Bacteroidetes; c__Flavobacteriia; o__Flavobacteriales; f__Flavobacteriaceae; g__Polaribacter; s__	2e-27
New.ReferenceOTU31010	NA	NA	NA	3.80397	5.53915	0.00135453		k__Bacteria; p__Bacteroidetes; c__Flavobacteriia; o__Flavobacteriales; f__Flavobacteriaceae; g__Polaribacter; s__	2e-24
New.ReferenceOTU10367	NA	NA	NA	6.0408	4.89307	0.00403186		k__Bacteria; p__Bacteroidetes; c__Flavobacteriia; o__Flavobacteriales; f__Flavobacteriaceae; g__Polaribacter; s__	2e-24
New.ReferenceOTU11719	NA	NA	NA	1.9758	4.2389	0.0337742		k__Bacteria; p__Bacteroidetes; c__Flavobacteriia; o__Flavobacteriales; f__Flavobacteriaceae; g__Polaribacter; s__	2e-20
4327599	NA	NA	NA	10.0921	5.31908	0.00137714		k__Bacteria; p__Bacteroidetes; c__Flavobacteriia; o__Flavobacteriales; f__Flavobacteriaceae; g__Robiginitalea; s__	4e-29
New.ReferenceOTU19424	NA	NA	NA	1.95926	4.21111	0.0348779		k__Bacteria; p__Bacteroidetes; c__Flavobacteriia; o__Flavobacteriales; f__Flavobacteriaceae; g__Robiginitalea; s__	3e-20
New.ReferenceOTU15789	4.97157	6.29393	0.000395027	NA	NA	NA		k__Bacteria; p__Bacteroidetes; c__Flavobacteriia; o__Flavobacteriales; f__Flavobacteriaceae; g__Robiginitalea; s__	9e-27
New.ReferenceOTU28981	NA	NA	NA	2.11223	4.89814	0.00726495		k__Bacteria; p__Bacteroidetes; c__Flavobacteriia; o__Flavobacteriales; f__Flavobacteriaceae; g__Tenacibaculum; s__	9e-27
New.ReferenceOTU817	NA	NA	NA	1.58784	4.11703	0.039465		k__Bacteria; p__Bacteroidetes; c__Flavobacteriia; o__Flavobacteriales; f__Flavobacteriaceae; g__Tenacibaculum; s__	5e-22
1141418	6.17665	5.307	2.83e-05	NA	NA	NA		k__Bacteria; p__Bacteroidetes; c__Flavobacteriia; o__Flavobacteriales; f__Flavobacteriaceae; g__Tenacibaculum; s__	6e-34
3570225	7.04987	6.66342	0.000132194	NA	NA	NA		k__Bacteria; p__Bacteroidetes; c__Flavobacteriia; o__Flavobacteriales; f__Flavobacteriaceae; g__Tenacibaculum; s__	6e-34
806130	0.649367	5.17268	0.00551389	NA	NA	NA		k__Bacteria; p__Bacteroidetes; c__Flavobacteriia; o__Flavobacteriales; f__Flavobacteriaceae; g__Tenacibaculum; s__	1e-28
New.ReferenceOTU15417	0.665081	4.74478	0.0177144	NA	NA	NA		k__Bacteria; p__Bacteroidetes; c__Flavobacteriia; o__Flavobacteriales; f__Flavobacteriaceae; g__Tenacibaculum; s__	2e-24
New.ReferenceOTU32769	0.301693	4.32681	0.0351084	NA	NA	NA		k__Bacteria; p__Bacteroidetes; c__Flavobacteriia; o__Flavobacteriales; f__Flavobacteriaceae; g__Tenacibaculum; s__	2e-24
New.ReferenceOTU24401	0.515385	4.33315	0.0382981	NA	NA	NA		k__Bacteria; p__Bacteroidetes; c__Flavobacteriia; o__Flavobacteriales; f__Flavobacteriaceae; g__Tenacibaculum; s__	2e-24
39685	0.304498	4.15982	0.0494662	NA	NA	NA		k__Bacteria; p__Bacteroidetes; c__Flavobacteriia; o__Flavobacteriales; f__Flavobacteriaceae; g__Tenacibaculum; s__	4e-25
279125	NA	NA	NA	4.86858	4.79367	0.0131893		k__Bacteria; p__Bacteroidetes; c__Flavobacteriia; o__Flavobacteriales; f__Flavobacteriaceae; g__Winogradskyella; s__	6e-34
769930	0.924227	4.78633	0.0190847	NA	NA	NA		k__Bacteria; p__Bacteroidetes; c__Flavobacteriia; o__Flavobacteriales; f__Flavobacteriaceae; g__Winogradskyella; s__	6e-34
1126194	NA	NA	NA	12.8831	4.34625	0.00274549		k__Bacteria; p__Bacteroidetes; c__Flavobacteriia; o__Flavobacteriales; f__Flavobacteriaceae; g__Winogradskyella; s__thalassocola	6e-34
101620	2.76253	4.07523	0.00399148	NA	NA	NA		k__Bacteria; p__Bacteroidetes; c__Flavobacteriia; o__Flavobacteriales; f__NS9; g__; s__	6e-34
248998	NA	NA	NA	3.9197	4.84668	0.011242		k__Bacteria; p__Bacteroidetes; c__Sphingobacteriia; o__Sphingobacteriales; f__; g__; s__	4e-29
177331	1.43933	4.2846	0.0494423	NA	NA	NA		k__Bacteria; p__Chloroflexi; c__Anaerolineae; o__Caldilineales; f__Caldilineaceae; g__; s__	6e-34
New.ReferenceOTU11488	1.08393	4.75045	0.0197833	NA	NA	NA		k__Bacteria; p__Chloroflexi; c__Anaerolineae; o__DRC31; f__; g__; s__	5e-22
361402	9.10697	3.27583	0.00766956	NA	NA	NA		k__Bacteria; p__Cyanobacteria; c__; o__; f__; g__; s__	1e-35
New.ReferenceOTU865	2.73209	4.85637	0.0107781	NA	NA	NA		k__Bacteria; p__Cyanobacteria; c__; o__; f__; g__; s__	2e-21
166728	1.41827	4.38434	0.0188493	NA	NA	NA		k__Bacteria; p__Cyanobacteria; c__; o__; f__; g__; s__	6e-31
New.ReferenceOTU12395	1.10602	4.45503	0.0376278	NA	NA	NA		k__Bacteria; p__Cyanobacteria; c__; o__; f__; g__; s__	1e-28
New.ReferenceOTU28977	NA	NA	NA	110.361	2.56851	0.041577		k__Bacteria; p__Cyanobacteria; c__4C0d-2; o__YS2; f__; g__; s__	2e-28
New.ReferenceOTU16050	NA	NA	NA	1.36328	3.96583	0.0494575		k__Bacteria; p__Cyanobacteria; c__4C0d-2; o__YS2; f__; g__; s__	2e-24
New.ReferenceOTU5017	2.25234	4.84045	0.00499493	NA	NA	NA		k__Bacteria; p__Cyanobacteria; c__4C0d-2; o__YS2; f__; g__; s__	1e-19
New.ReferenceOTU6188	17.6331	4.94822	0.0152276	NA	NA	NA		k__Bacteria; p__Cyanobacteria; c__4C0d-2; o__YS2; f__; g__; s__	2e-21
New.ReferenceOTU2245	3.1375	-4.65488	4.05e-07	NA	NA	NA		k__Bacteria; p__Cyanobacteria; c__Chloroplast; o__; f__; g__; s__	1e-22
1789520	22.7193	-4.37607	2.22e-05	NA	NA	NA		k__Bacteria; p__Cyanobacteria; c__Chloroplast; o__; f__; g__; s__	5e-28
385423	6.17178	-5.99302	0.000144974	NA	NA	NA		k__Bacteria; p__Cyanobacteria; c__Chloroplast; o__; f__; g__; s__	1e-35
543761	11.3094	-4.48042	0.00019014	NA	NA	NA		k__Bacteria; p__Cyanobacteria; c__Chloroplast; o__; f__; g__; s__	1e-35
New.ReferenceOTU20963	1.83818	4.90373	0.0159417	NA	NA	NA		k__Bacteria; p__Cyanobacteria; c__Chloroplast; o__; f__; g__; s__	9e-24
140201	NA	NA	NA	NA	NA	NA		k__Bacteria; p__Cyanobacteria; c__Chloroplast; o__CAB-I; f__; g__; s__	6e-31
720750	91.5805	-4.01027	1.88e-09	NA	NA	NA		k__Bacteria; p__Cyanobacteria; c__Chloroplast; o__Chlorophyta; f__Mamiellaceae; g__; s__	4e-35
4480587	53.9888	-2.75222	7.68e-05	NA	NA	NA		k__Bacteria; p__Cyanobacteria; c__Chloroplast; o__Chlorophyta; f__Mamiellaceae; g__; s__	1e-32
558128	15.5032	4.22782	0.00416763	NA	NA	NA		k__Bacteria; p__Cyanobacteria; c__Chloroplast; o__Chlorophyta; f__Ulvophyceae; g__; s__	6e-31
New.ReferenceOTU15923	15.0393	3.42464	0.0374852	NA	NA	NA		k__Bacteria; p__Cyanobacteria; c__Chloroplast; o__Chlorophyta; f__Ulvophyceae; g__; s__	8e-21
New.ReferenceOTU10522	24.9473	-4.35053	0.0399956	NA	NA	NA		k__Bacteria; p__Cyanobacteria; c__Chloroplast; o__Chlorophyta; f__Ulvophyceae; g__; s__	1e-25
587489	NA	NA	NA	NA	NA	NA		k__Bacteria; p__Cyanobacteria; c__Chloroplast; o__Chlorophyta; f__Ulvophyceae; g__; s__	9e-33
New.ReferenceOTU6456	17.4808	-6.3699	5.74e-09	NA	NA	NA		k__Bacteria; p__Cyanobacteria; c__Chloroplast; o__Cryptophyta; f__; g__; s__	1e-28
209603	10.554	-4.01658	0.000326169	NA	NA	NA		k__Bacteria; p__Cyanobacteria; c__Chloroplast; o__Cryptophyta; f__; g__; s__	6e-31
New.ReferenceOTU13103	7.18262	-4.22511	0.000850885	NA	NA	NA		k__Bacteria; p__Cyanobacteria; c__Chloroplast; o__Cryptophyta; f__; g__; s__	1e-28
New.ReferenceOTU11331	0.970533	5.37352	0.00390049	NA	NA	NA		k__Bacteria; p__Cyanobacteria; c__Chloroplast; o__Cryptophyta; f__; g__; s__	4e-22
827773	12.9527	-3.48939	0.0106901	NA	NA	NA		k__Bacteria; p__Cyanobacteria; c__Chloroplast; o__Cryptophyta; f__; g__; s__	6e-31
New.ReferenceOTU33732	2.38182	-2.84148	0.0198018	NA	NA	NA		k__Bacteria; p__Cyanobacteria; c__Chloroplast; o__Cryptophyta; f__; g__; s__	4e-22
New.ReferenceOTU12822	24.7285	4.60795	0.0325729	NA	NA	NA		k__Bacteria; p__Cyanobacteria; c__Chloroplast; o__Cryptophyta; f__; g__; s__	5e-19
New.ReferenceOTU30262	1.35128	-4.64731	0.00608121	NA	NA	NA		k__Bacteria; p__Cyanobacteria; c__Chloroplast; o__Haptophyceae; f__; g__; s__	4e-22
826143	17.1794	-2.571	0.0111581	NA	NA	NA		k__Bacteria; p__Cyanobacteria; c__Chloroplast; o__Haptophyceae; f__; g__; s__	1e-35
New.ReferenceOTU21075	0.572142	-5.0081	0.0176985	NA	NA	NA		k__Bacteria; p__Cyanobacteria; c__Chloroplast; o__Haptophyceae; f__; g__; s__	4e-22
646279	11.6246	-3.53183	0.0216718	NA	NA	NA		k__Bacteria; p__Cyanobacteria; c__Chloroplast; o__Haptophyceae; f__; g__; s__	1e-35
830253	16.2788	-2.48767	0.0233277	NA	NA	NA		k__Bacteria; p__Cyanobacteria; c__Chloroplast; o__Haptophyceae; f__; g__; s__	1e-35
4357330	0.26066	-4.67015	0.0338573	NA	NA	NA		k__Bacteria; p__Cyanobacteria; c__Chloroplast; o__Haptophyceae; f__; g__; s__	6e-31
New.ReferenceOTU25984	25.6133	7.53589	4.77e-06	NA	NA	NA		k__Bacteria; p__Cyanobacteria; c__Chloroplast; o__Rhodophyta; f__; g__; s__	1e-32
544751	5.54867	6.9717	1.87e-05	NA	NA	NA		k__Bacteria; p__Cyanobacteria; c__Chloroplast; o__Rhodophyta; f__; g__; s__	1e-35
New.ReferenceOTU6373	4.50446	6.81409	3.8e-05	NA	NA	NA		k__Bacteria; p__Cyanobacteria; c__Chloroplast; o__Rhodophyta; f__; g__; s__	1e-28
343285	4.95211	6.70544	7.72e-05	NA	NA	NA		k__Bacteria; p__Cyanobacteria; c__Chloroplast; o__Rhodophyta; f__; g__; s__	1e-35
146233	2.45657	5.51791	0.00371792	NA	NA	NA		k__Bacteria; p__Cyanobacteria; c__Chloroplast; o__Rhodophyta; f__; g__; s__	1e-32
New.ReferenceOTU36198	2.30807	5.45992	0.00410702	NA	NA	NA		k__Bacteria; p__Cyanobacteria; c__Chloroplast; o__Rhodophyta; f__; g__; s__	1e-28
New.ReferenceOTU18145	4.35843	5.4268	0.00524475	NA	NA	NA		k__Bacteria; p__Cyanobacteria; c__Chloroplast; o__Rhodophyta; f__; g__; s__	2e-24
New.ReferenceOTU22016	2.36614	5.29973	0.00714713	NA	NA	NA		k__Bacteria; p__Cyanobacteria; c__Chloroplast; o__Rhodophyta; f__; g__; s__	1e-28
New.ReferenceOTU21573	1.35461	5.07037	0.0096286	NA	NA	NA		k__Bacteria; p__Cyanobacteria; c__Chloroplast; o__Rhodophyta; f__; g__; s__	9e-24
New.ReferenceOTU18124	3.38156	5.14088	0.0102437	NA	NA	NA		k__Bacteria; p__Cyanobacteria; c__Chloroplast; o__Rhodophyta; f__; g__; s__	3e-08
4388388	1.56937	4.68885	0.0239176	NA	NA	NA		k__Bacteria; p__Cyanobacteria; c__Chloroplast; o__Rhodophyta; f__; g__; s__	2e-33
New.ReferenceOTU4412	1.9927	4.63498	0.0289631	NA	NA	NA		k__Bacteria; p__Cyanobacteria; c__Chloroplast; o__Rhodophyta; f__; g__; s__	1e-16
New.ReferenceOTU31154	NA	NA	NA	NA	NA	NA		k__Bacteria; p__Cyanobacteria; c__Chloroplast; o__Rhodophyta; f__; g__; s__	9e-08
New.ReferenceOTU30551	109.808	7.17022	1.32e-19	NA	NA	NA		k__Bacteria; p__Cyanobacteria; c__Chloroplast; o__Stramenopiles; f__; g__; s__	1e-19
988157	93.221	4.73028	2.56e-17	NA	NA	NA		k__Bacteria; p__Cyanobacteria; c__Chloroplast; o__Stramenopiles; f__; g__; s__	1e-19
313351	39.4721	4.4934	2.29e-15	NA	NA	NA		k__Bacteria; p__Cyanobacteria; c__Chloroplast; o__Stramenopiles; f__; g__; s__	1e-19
358682	527.051	5.94949	2.73e-12	NA	NA	NA		k__Bacteria; p__Cyanobacteria; c__Chloroplast; o__Stramenopiles; f__; g__; s__	6e-31
361147	1375.32	4.38877	3.15e-11	NA	NA	NA		k__Bacteria; p__Cyanobacteria; c__Chloroplast; o__Stramenopiles; f__; g__; s__	1e-19
New.ReferenceOTU8731	16.6891	5.59892	4.44e-09	NA	NA	NA		k__Bacteria; p__Cyanobacteria; c__Chloroplast; o__Stramenopiles; f__; g__; s__	5e-13
101837	279.884	3.2992	1.83e-08	NA	NA	NA		k__Bacteria; p__Cyanobacteria; c__Chloroplast; o__Stramenopiles; f__; g__; s__	1e-35
New.ReferenceOTU29228	17.4337	5.05861	9.77e-08	NA	NA	NA		k__Bacteria; p__Cyanobacteria; c__Chloroplast; o__Stramenopiles; f__; g__; s__	2e-12
109247	199.218	4.19647	1.54e-07	NA	NA	NA		k__Bacteria; p__Cyanobacteria; c__Chloroplast; o__Stramenopiles; f__; g__; s__	1e-19
347310	87.874	-3.29422	4.16e-07	NA	NA	NA		k__Bacteria; p__Cyanobacteria; c__Chloroplast; o__Stramenopiles; f__; g__; s__	2e-33
4402734	1380.51	2.9211	4.51e-07	NA	NA	NA		k__Bacteria; p__Cyanobacteria; c__Chloroplast; o__Stramenopiles; f__; g__; s__	1e-35
New.ReferenceOTU28339	5.12778	6.39233	1.07e-06	NA	NA	NA		k__Bacteria; p__Cyanobacteria; c__Chloroplast; o__Stramenopiles; f__; g__; s__	1e-09
New.ReferenceOTU12120	5.1537	7.44432	1.19e-06	NA	NA	NA		k__Bacteria; p__Cyanobacteria; c__Chloroplast; o__Stramenopiles; f__; g__; s__	9e-08
New.ReferenceOTU21951	14.4233	5.48289	1.27e-06	NA	NA	NA		k__Bacteria; p__Cyanobacteria; c__Chloroplast; o__Stramenopiles; f__; g__; s__	9e-27
560496	12.9412	4.23602	2.06e-06	NA	NA	NA		k__Bacteria; p__Cyanobacteria; c__Chloroplast; o__Stramenopiles; f__; g__; s__	1e-35
New.ReferenceOTU28917	15.3676	5.46399	3.44e-06	NA	NA	NA		k__Bacteria; p__Cyanobacteria; c__Chloroplast; o__Stramenopiles; f__; g__; s__	1e-19
3478704	47.6552	-3.33202	3.85e-06	NA	NA	NA		k__Bacteria; p__Cyanobacteria; c__Chloroplast; o__Stramenopiles; f__; g__; s__	6e-31
786099	139.322	-2.87584	7.22e-06	NA	NA	NA		k__Bacteria; p__Cyanobacteria; c__Chloroplast; o__Stramenopiles; f__; g__; s__	2e-33
New.ReferenceOTU36456	4.69023	5.89157	1.47e-05	NA	NA	NA		k__Bacteria; p__Cyanobacteria; c__Chloroplast; o__Stramenopiles; f__; g__; s__	4e-10
New.ReferenceOTU25172	3.32457	6.82399	2.49e-05	NA	NA	NA		k__Bacteria; p__Cyanobacteria; c__Chloroplast; o__Stramenopiles; f__; g__; s__	9e-11
New.ReferenceOTU27003	38.759	5.30153	2.88e-05	NA	NA	NA		k__Bacteria; p__Cyanobacteria; c__Chloroplast; o__Stramenopiles; f__; g__; s__	4e-22
2224034	4.75691	4.58125	3.12e-05	NA	NA	NA		k__Bacteria; p__Cyanobacteria; c__Chloroplast; o__Stramenopiles; f__; g__; s__	1e-35
New.ReferenceOTU20170	10.9641	5.7899	4.25e-05	NA	NA	NA		k__Bacteria; p__Cyanobacteria; c__Chloroplast; o__Stramenopiles; f__; g__; s__	3e-14
New.ReferenceOTU35488	123.44	4.46278	7.25e-05	NA	NA	NA		k__Bacteria; p__Cyanobacteria; c__Chloroplast; o__Stramenopiles; f__; g__; s__	1e-28
New.ReferenceOTU31365	2.84154	6.54718	7.68e-05	NA	NA	NA		k__Bacteria; p__Cyanobacteria; c__Chloroplast; o__Stramenopiles; f__; g__; s__	6e-09
325174	37.1685	3.13962	7.83e-05	NA	NA	NA		k__Bacteria; p__Cyanobacteria; c__Chloroplast; o__Stramenopiles; f__; g__; s__	1e-35
New.ReferenceOTU5696	2.56566	6.45433	0.000115223	NA	NA	NA		k__Bacteria; p__Cyanobacteria; c__Chloroplast; o__Stramenopiles; f__; g__; s__	1e-07
New.ReferenceOTU16751	4.17963	4.23293	0.000191042	NA	NA	NA		k__Bacteria; p__Cyanobacteria; c__Chloroplast; o__Stramenopiles; f__; g__; s__	3e-20
New.ReferenceOTU30578	2.71985	3.92682	0.000302413	NA	NA	NA		k__Bacteria; p__Cyanobacteria; c__Chloroplast; o__Stramenopiles; f__; g__; s__	1e-19
New.ReferenceOTU23854	2.1656	6.16149	0.000353295	NA	NA	NA		k__Bacteria; p__Cyanobacteria; c__Chloroplast; o__Stramenopiles; f__; g__; s__	3e-10
New.ReferenceOTU4228	1.86645	6.1028	0.000395382	NA	NA	NA		k__Bacteria; p__Cyanobacteria; c__Chloroplast; o__Stramenopiles; f__; g__; s__	2e-11
532888	6.16258	3.59257	0.00062107	NA	NA	NA		k__Bacteria; p__Cyanobacteria; c__Chloroplast; o__Stramenopiles; f__; g__; s__	4e-35
New.ReferenceOTU34513	1.4336	5.75962	0.00122839	NA	NA	NA		k__Bacteria; p__Cyanobacteria; c__Chloroplast; o__Stramenopiles; f__; g__; s__	4e-26
New.ReferenceOTU34109	4.97526	3.10602	0.00129687	NA	NA	NA		k__Bacteria; p__Cyanobacteria; c__Chloroplast; o__Stramenopiles; f__; g__; s__	2e-12
New.ReferenceOTU22846	7.16418	-2.486	0.00129687	NA	NA	NA		k__Bacteria; p__Cyanobacteria; c__Chloroplast; o__Stramenopiles; f__; g__; s__	4e-22
2140618	4.46416	3.79744	0.00145377	NA	NA	NA		k__Bacteria; p__Cyanobacteria; c__Chloroplast; o__Stramenopiles; f__; g__; s__	1e-35
532823	41.9925	-2.36341	0.00169107	NA	NA	NA		k__Bacteria; p__Cyanobacteria; c__Chloroplast; o__Stramenopiles; f__; g__; s__	1e-35
New.ReferenceOTU33383	2.23612	5.74641	0.00169436	NA	NA	NA		k__Bacteria; p__Cyanobacteria; c__Chloroplast; o__Stramenopiles; f__; g__; s__	4e-22
New.ReferenceOTU27416	2.81887	4.20839	0.00172873	NA	NA	NA		k__Bacteria; p__Cyanobacteria; c__Chloroplast; o__Stramenopiles; f__; g__; s__	4e-22
New.ReferenceOTU36280	1.44056	5.62062	0.00198835	NA	NA	NA		k__Bacteria; p__Cyanobacteria; c__Chloroplast; o__Stramenopiles; f__; g__; s__	2e-08
New.ReferenceOTU32392	5.3329	5.49596	0.00198853	NA	NA	NA		k__Bacteria; p__Cyanobacteria; c__Chloroplast; o__Stramenopiles; f__; g__; s__	4e-23
New.ReferenceOTU11562	5.73783	2.83798	0.00228271	NA	NA	NA		k__Bacteria; p__Cyanobacteria; c__Chloroplast; o__Stramenopiles; f__; g__; s__	6e-12
New.ReferenceOTU17407	1.64826	5.56915	0.00235903	NA	NA	NA		k__Bacteria; p__Cyanobacteria; c__Chloroplast; o__Stramenopiles; f__; g__; s__	1e-19
New.ReferenceOTU33662	1.23339	5.5136	0.00257355	NA	NA	NA		k__Bacteria; p__Cyanobacteria; c__Chloroplast; o__Stramenopiles; f__; g__; s__	3e-23
103868	6.90482	2.80536	0.00259738	NA	NA	NA		k__Bacteria; p__Cyanobacteria; c__Chloroplast; o__Stramenopiles; f__; g__; s__	1e-35
1133273	2.42733	3.42214	0.00288212	NA	NA	NA		k__Bacteria; p__Cyanobacteria; c__Chloroplast; o__Stramenopiles; f__; g__; s__	2e-33
New.ReferenceOTU898	8.7312	4.95708	0.00290619	NA	NA	NA		k__Bacteria; p__Cyanobacteria; c__Chloroplast; o__Stramenopiles; f__; g__; s__	4e-26
New.ReferenceOTU7275	1.18462	5.47204	0.00308838	NA	NA	NA		k__Bacteria; p__Cyanobacteria; c__Chloroplast; o__Stramenopiles; f__; g__; s__	3e-14
4401165	84.3915	4.67735	0.00393268	NA	NA	NA		k__Bacteria; p__Cyanobacteria; c__Chloroplast; o__Stramenopiles; f__; g__; s__	2e-33
New.ReferenceOTU20542	0.966971	5.34612	0.00406015	NA	NA	NA		k__Bacteria; p__Cyanobacteria; c__Chloroplast; o__Stramenopiles; f__; g__; s__	3e-14
New.ReferenceOTU24300	0.733446	5.29221	0.00412	NA	NA	NA		k__Bacteria; p__Cyanobacteria; c__Chloroplast; o__Stramenopiles; f__; g__; s__	3e-14
New.ReferenceOTU634	1.36617	4.37414	0.00428312	NA	NA	NA		k__Bacteria; p__Cyanobacteria; c__Chloroplast; o__Stramenopiles; f__; g__; s__	1e-19
New.ReferenceOTU14320	1.08512	4.34777	0.00445622	NA	NA	NA		k__Bacteria; p__Cyanobacteria; c__Chloroplast; o__Stramenopiles; f__; g__; s__	3e-23
New.ReferenceOTU2764	0.84208	5.28283	0.00462348	NA	NA	NA		k__Bacteria; p__Cyanobacteria; c__Chloroplast; o__Stramenopiles; f__; g__; s__	9e-08
607386	3.36284	2.56509	0.00469544	NA	NA	NA		k__Bacteria; p__Cyanobacteria; c__Chloroplast; o__Stramenopiles; f__; g__; s__	1e-35
817300	2.6988	3.37429	0.00642146	NA	NA	NA		k__Bacteria; p__Cyanobacteria; c__Chloroplast; o__Stramenopiles; f__; g__; s__	1e-35
579531	5.34765	2.29097	0.00795309	NA	NA	NA		k__Bacteria; p__Cyanobacteria; c__Chloroplast; o__Stramenopiles; f__; g__; s__	1e-19
New.ReferenceOTU31738	1.10378	4.4123	0.00830765	NA	NA	NA		k__Bacteria; p__Cyanobacteria; c__Chloroplast; o__Stramenopiles; f__; g__; s__	3e-23
New.ReferenceOTU18859	3.61636	5.22358	0.00861359	NA	NA	NA		k__Bacteria; p__Cyanobacteria; c__Chloroplast; o__Stramenopiles; f__; g__; s__	1e-13
New.ReferenceOTU7778	0.783967	5.03335	0.008992	NA	NA	NA		k__Bacteria; p__Cyanobacteria; c__Chloroplast; o__Stramenopiles; f__; g__; s__	8e-15
New.ReferenceOTU4842	0.811266	4.3501	0.00899261	NA	NA	NA		k__Bacteria; p__Cyanobacteria; c__Chloroplast; o__Stramenopiles; f__; g__; s__	1e-19
New.ReferenceOTU36365	0.642202	4.98989	0.00909412	NA	NA	NA		k__Bacteria; p__Cyanobacteria; c__Chloroplast; o__Stramenopiles; f__; g__; s__	6e-12
363125	236.428	2.93241	0.00918662	NA	NA	NA		k__Bacteria; p__Cyanobacteria; c__Chloroplast; o__Stramenopiles; f__; g__; s__	6e-31
New.ReferenceOTU20527	0.986823	3.8581	0.00944343	NA	NA	NA		k__Bacteria; p__Cyanobacteria; c__Chloroplast; o__Stramenopiles; f__; g__; s__	1e-13
New.ReferenceOTU10636	0.879633	4.98536	0.0103698	NA	NA	NA		k__Bacteria; p__Cyanobacteria; c__Chloroplast; o__Stramenopiles; f__; g__; s__	6e-12
4350193	15.7729	-3.13479	0.0103921	NA	NA	NA		k__Bacteria; p__Cyanobacteria; c__Chloroplast; o__Stramenopiles; f__; g__; s__	1e-35
New.ReferenceOTU5489	0.755465	4.95352	0.0109371	NA	NA	NA		k__Bacteria; p__Cyanobacteria; c__Chloroplast; o__Stramenopiles; f__; g__; s__	1e-19
New.ReferenceOTU10849	31.1473	4.78688	0.0113535	NA	NA	NA		k__Bacteria; p__Cyanobacteria; c__Chloroplast; o__Stramenopiles; f__; g__; s__	1e-07
New.ReferenceOTU7534	0.905993	4.94978	0.0115871	NA	NA	NA		k__Bacteria; p__Cyanobacteria; c__Chloroplast; o__Stramenopiles; f__; g__; s__	3e-20
New.ReferenceOTU35705	1.01805	3.43604	0.0116437	NA	NA	NA		k__Bacteria; p__Cyanobacteria; c__Chloroplast; o__Stramenopiles; f__; g__; s__	1e-28
New.ReferenceOTU10746	0.656326	4.89484	0.0121749	NA	NA	NA		k__Bacteria; p__Cyanobacteria; c__Chloroplast; o__Stramenopiles; f__; g__; s__	2e-15
New.ReferenceOTU24680	0.707255	4.89277	0.0122149	NA	NA	NA		k__Bacteria; p__Cyanobacteria; c__Chloroplast; o__Stramenopiles; f__; g__; s__	8e-15
New.ReferenceOTU11335	12.6048	4.33975	0.0138193	NA	NA	NA		k__Bacteria; p__Cyanobacteria; c__Chloroplast; o__Stramenopiles; f__; g__; s__	1e-28
New.ReferenceOTU28152	1.62537	3.82627	0.0143395	NA	NA	NA		k__Bacteria; p__Cyanobacteria; c__Chloroplast; o__Stramenopiles; f__; g__; s__	2e-08
New.ReferenceOTU8514	0.782608	4.84582	0.0144827	NA	NA	NA		k__Bacteria; p__Cyanobacteria; c__Chloroplast; o__Stramenopiles; f__; g__; s__	1e-19
New.ReferenceOTU4703	0.795502	4.78374	0.0163195	NA	NA	NA		k__Bacteria; p__Cyanobacteria; c__Chloroplast; o__Stramenopiles; f__; g__; s__	1e-28
New.ReferenceOTU14797	15.5637	-3.14002	0.0168041	NA	NA	NA		k__Bacteria; p__Cyanobacteria; c__Chloroplast; o__Stramenopiles; f__; g__; s__	3e-30
4477200	96.0753	2.17078	0.0185149	NA	NA	NA		k__Bacteria; p__Cyanobacteria; c__Chloroplast; o__Stramenopiles; f__; g__; s__	8e-18
New.ReferenceOTU5223	0.750866	4.74138	0.0188829	NA	NA	NA		k__Bacteria; p__Cyanobacteria; c__Chloroplast; o__Stramenopiles; f__; g__; s__	3e-20
New.ReferenceOTU24326	0.742891	4.72755	0.0191595	NA	NA	NA		k__Bacteria; p__Cyanobacteria; c__Chloroplast; o__Stramenopiles; f__; g__; s__	3e-20
New.ReferenceOTU5916	37.0473	4.11704	0.0194918	NA	NA	NA		k__Bacteria; p__Cyanobacteria; c__Chloroplast; o__Stramenopiles; f__; g__; s__	1e-28
New.ReferenceOTU6395	0.974505	4.77729	0.019585	NA	NA	NA		k__Bacteria; p__Cyanobacteria; c__Chloroplast; o__Stramenopiles; f__; g__; s__	9e-30
New.ReferenceOTU36725	79.8753	3.95552	0.0199322	NA	NA	NA		k__Bacteria; p__Cyanobacteria; c__Chloroplast; o__Stramenopiles; f__; g__; s__	1e-10
795504	17.97	2.34878	0.0203452	NA	NA	NA		k__Bacteria; p__Cyanobacteria; c__Chloroplast; o__Stramenopiles; f__; g__; s__	1e-35
New.ReferenceOTU28820	0.659959	4.67061	0.0208395	NA	NA	NA		k__Bacteria; p__Cyanobacteria; c__Chloroplast; o__Stramenopiles; f__; g__; s__	9e-11
1029559	0.438318	4.60862	0.0212635	NA	NA	NA		k__Bacteria; p__Cyanobacteria; c__Chloroplast; o__Stramenopiles; f__; g__; s__	2e-33
New.ReferenceOTU20834	0.476464	4.61425	0.0214405	NA	NA	NA		k__Bacteria; p__Cyanobacteria; c__Chloroplast; o__Stramenopiles; f__; g__; s__	3e-23
New.ReferenceOTU19820	0.162005	-4.81938	0.0222774	NA	NA	NA		k__Bacteria; p__Cyanobacteria; c__Chloroplast; o__Stramenopiles; f__; g__; s__	6e-28
New.ReferenceOTU25752	0.456819	4.59086	0.022479	NA	NA	NA		k__Bacteria; p__Cyanobacteria; c__Chloroplast; o__Stramenopiles; f__; g__; s__	9e-08
New.ReferenceOTU4233	0.702098	4.05819	0.0233277	NA	NA	NA		k__Bacteria; p__Cyanobacteria; c__Chloroplast; o__Stramenopiles; f__; g__; s__	9e-11
New.ReferenceOTU2903	0.77994	4.6274	0.0250832	NA	NA	NA		k__Bacteria; p__Cyanobacteria; c__Chloroplast; o__Stramenopiles; f__; g__; s__	4e-26
New.ReferenceOTU11311	0.75613	4.59835	0.0264809	NA	NA	NA		k__Bacteria; p__Cyanobacteria; c__Chloroplast; o__Stramenopiles; f__; g__; s__	4e-26
106539	215.708	1.77788	0.0265308	NA	NA	NA		k__Bacteria; p__Cyanobacteria; c__Chloroplast; o__Stramenopiles; f__; g__; s__	1e-35
New.ReferenceOTU19890	0.463561	4.48092	0.0278279	NA	NA	NA		k__Bacteria; p__Cyanobacteria; c__Chloroplast; o__Stramenopiles; f__; g__; s__	2e-11
New.ReferenceOTU30790	1.01975	4.59676	0.0287112	NA	NA	NA		k__Bacteria; p__Cyanobacteria; c__Chloroplast; o__Stramenopiles; f__; g__; s__	1e-22
New.ReferenceOTU32853	0.284892	4.44091	0.0291402	NA	NA	NA		k__Bacteria; p__Cyanobacteria; c__Chloroplast; o__Stramenopiles; f__; g__; s__	1e-32
New.ReferenceOTU36460	0.47399	4.44193	0.0304627	NA	NA	NA		k__Bacteria; p__Cyanobacteria; c__Chloroplast; o__Stramenopiles; f__; g__; s__	6e-12
New.ReferenceOTU20590	0.427847	4.43094	0.0306093	NA	NA	NA		k__Bacteria; p__Cyanobacteria; c__Chloroplast; o__Stramenopiles; f__; g__; s__	1e-22
New.ReferenceOTU23383	0.422415	4.42441	0.0308066	NA	NA	NA		k__Bacteria; p__Cyanobacteria; c__Chloroplast; o__Stramenopiles; f__; g__; s__	2e-11
New.ReferenceOTU32575	0.474981	4.40295	0.0326191	NA	NA	NA		k__Bacteria; p__Cyanobacteria; c__Chloroplast; o__Stramenopiles; f__; g__; s__	1e-10
New.ReferenceOTU1692	0.211291	-3.3521	0.0328352	NA	NA	NA		k__Bacteria; p__Cyanobacteria; c__Chloroplast; o__Stramenopiles; f__; g__; s__	4e-26
New.ReferenceOTU8914	0.62382	4.39637	0.0346074	NA	NA	NA		k__Bacteria; p__Cyanobacteria; c__Chloroplast; o__Stramenopiles; f__; g__; s__	1e-28
New.ReferenceOTU20269	0.564048	4.42132	0.0347607	NA	NA	NA		k__Bacteria; p__Cyanobacteria; c__Chloroplast; o__Stramenopiles; f__; g__; s__	4e-26
New.ReferenceOTU18369	5.55768	3.72887	0.0376278	NA	NA	NA		k__Bacteria; p__Cyanobacteria; c__Chloroplast; o__Stramenopiles; f__; g__; s__	4e-22
New.ReferenceOTU23805	0.19584	-3.7791	0.0377777	NA	NA	NA		k__Bacteria; p__Cyanobacteria; c__Chloroplast; o__Stramenopiles; f__; g__; s__	6e-28
New.ReferenceOTU29060	0.647516	4.37481	0.0392965	NA	NA	NA		k__Bacteria; p__Cyanobacteria; c__Chloroplast; o__Stramenopiles; f__; g__; s__	4e-26
New.ReferenceOTU14140	0.536321	4.3169	0.0396422	NA	NA	NA		k__Bacteria; p__Cyanobacteria; c__Chloroplast; o__Stramenopiles; f__; g__; s__	9e-11
New.ReferenceOTU19559	57.9453	3.45123	0.0403789	NA	NA	NA		k__Bacteria; p__Cyanobacteria; c__Chloroplast; o__Stramenopiles; f__; g__; s__	1e-28
New.ReferenceOTU12554	0.474774	4.27561	0.0420652	NA	NA	NA		k__Bacteria; p__Cyanobacteria; c__Chloroplast; o__Stramenopiles; f__; g__; s__	3e-17
New.ReferenceOTU14147	1.97463	4.22102	0.0421444	NA	NA	NA		k__Bacteria; p__Cyanobacteria; c__Chloroplast; o__Stramenopiles; f__; g__; s__	6e-19
New.ReferenceOTU26517	12.1935	4.3867	0.0445852	NA	NA	NA		k__Bacteria; p__Cyanobacteria; c__Chloroplast; o__Stramenopiles; f__; g__; s__	4e-26
New.ReferenceOTU30998	0.426241	4.23583	0.0452493	NA	NA	NA		k__Bacteria; p__Cyanobacteria; c__Chloroplast; o__Stramenopiles; f__; g__; s__	2e-16
New.ReferenceOTU27196	0.45162	4.22454	0.0458477	NA	NA	NA		k__Bacteria; p__Cyanobacteria; c__Chloroplast; o__Stramenopiles; f__; g__; s__	3e-14
New.ReferenceOTU31325	0.417389	4.21481	0.0472675	NA	NA	NA		k__Bacteria; p__Cyanobacteria; c__Chloroplast; o__Stramenopiles; f__; g__; s__	5e-13
337487	NA	NA	NA	NA	NA	NA		k__Bacteria; p__Cyanobacteria; c__Chloroplast; o__Stramenopiles; f__; g__; s__	2e-31
660336	NA	NA	NA	NA	NA	NA		k__Bacteria; p__Cyanobacteria; c__Chloroplast; o__Stramenopiles; f__; g__; s__	2e-33
712831	NA	NA	NA	NA	NA	NA		k__Bacteria; p__Cyanobacteria; c__Chloroplast; o__Stramenopiles; f__; g__; s__	2e-24
New.ReferenceOTU17211	NA	NA	NA	NA	NA	NA		k__Bacteria; p__Cyanobacteria; c__Chloroplast; o__Stramenopiles; f__; g__; s__	3e-23
New.ReferenceOTU2037	NA	NA	NA	NA	NA	NA		k__Bacteria; p__Cyanobacteria; c__Chloroplast; o__Stramenopiles; f__; g__; s__	3e-23
New.ReferenceOTU37206	NA	NA	NA	NA	NA	NA		k__Bacteria; p__Cyanobacteria; c__Chloroplast; o__Stramenopiles; f__; g__; s__	7e-21
New.ReferenceOTU4207	NA	NA	NA	NA	NA	NA		k__Bacteria; p__Cyanobacteria; c__Chloroplast; o__Stramenopiles; f__; g__; s__	1e-28
New.ReferenceOTU6368	NA	NA	NA	NA	NA	NA		k__Bacteria; p__Cyanobacteria; c__Chloroplast; o__Stramenopiles; f__; g__; s__	9e-27
2151874	53.3816	-2.00322	6.47e-05	NA	NA	NA		k__Bacteria; p__Cyanobacteria; c__Chloroplast; o__Streptophyta; f__; g__; s__	1e-35
4422313	6.15106	-2.17501	8.81e-05	NA	NA	NA		k__Bacteria; p__Cyanobacteria; c__Chloroplast; o__Streptophyta; f__; g__; s__	7e-27
4361470	5.63109	-2.66994	0.0238283	NA	NA	NA		k__Bacteria; p__Cyanobacteria; c__Chloroplast; o__Streptophyta; f__; g__; s__	1e-35
1124370	1.89941	-1.79424	0.0315704	NA	NA	NA		k__Bacteria; p__Cyanobacteria; c__Chloroplast; o__Streptophyta; f__; g__; s__	2e-33
New.ReferenceOTU28580	15.6481	5.04971	2.11e-06	NA	NA	NA		k__Bacteria; p__Cyanobacteria; c__Nostocophycideae; o__Nostocales; f__Nostocaceae; g__; s__	5e-22
New.ReferenceOTU9192	1.11053	4.25989	0.0499344	NA	NA	NA		k__Bacteria; p__Cyanobacteria; c__Nostocophycideae; o__Nostocales; f__Nostocaceae; g__; s__	2e-24
351529	1.28654	3.73008	0.047391	NA	NA	NA		k__Bacteria; p__Cyanobacteria; c__Nostocophycideae; o__Stigonematales; f__Rivulariaceae; g__Rivularia; s__	2e-33
3232	1.13585	4.81639	0.0184237	NA	NA	NA		k__Bacteria; p__Cyanobacteria; c__Oscillatoriophycideae; o__Chroococcales; f__Spirulinaceae; g__Spirulina; s__subsalsa	6e-31
New.ReferenceOTU27412	11.35	5.12869	0.000146538	NA	NA	NA		k__Bacteria; p__Cyanobacteria; c__Synechococcophycideae; o__Pseudanabaenales; f__Pseudanabaenaceae; g__; s__	4e-26
New.ReferenceOTU3154	4.28088	4.76582	0.00495467	NA	NA	NA		k__Bacteria; p__Cyanobacteria; c__Synechococcophycideae; o__Pseudanabaenales; f__Pseudanabaenaceae; g__; s__	1e-28
New.ReferenceOTU34026	1.79522	4.26503	0.0155047	NA	NA	NA		k__Bacteria; p__Cyanobacteria; c__Synechococcophycideae; o__Pseudanabaenales; f__Pseudanabaenaceae; g__; s__	9e-24
New.ReferenceOTU35543	1.17527	4.75463	0.0199042	NA	NA	NA		k__Bacteria; p__Cyanobacteria; c__Synechococcophycideae; o__Pseudanabaenales; f__Pseudanabaenaceae; g__; s__	4e-26
New.ReferenceOTU14075	1.23251	3.89854	0.0429735	NA	NA	NA		k__Bacteria; p__Cyanobacteria; c__Synechococcophycideae; o__Pseudanabaenales; f__Pseudanabaenaceae; g__; s__	9e-24
2672863	0.916875	3.70391	0.0457773	NA	NA	NA		k__Bacteria; p__Cyanobacteria; c__Synechococcophycideae; o__Pseudanabaenales; f__Pseudanabaenaceae; g__; s__	6e-31
3346542	8.83516	-3.6453	0.00538853	NA	NA	NA		k__Bacteria; p__Cyanobacteria; c__Synechococcophycideae; o__Synechococcales; f__Synechococcaceae; g__Prochlorococcus; s__	1e-35
New.ReferenceOTU14504	NA	NA	NA	1.25756	4.13706	0.036132		k__Bacteria; p__Cyanobacteria; c__Synechococcophycideae; o__Synechococcales; f__Synechococcaceae; g__Synechococcus; s__	1e-16
4408874	63.5202	-1.2271	0.0221434	NA	NA	NA		k__Bacteria; p__Cyanobacteria; c__Synechococcophycideae; o__Synechococcales; f__Synechococcaceae; g__Synechococcus; s__	1e-35
231908	290.682	-0.997911	0.0243015	NA	NA	NA		k__Bacteria; p__Cyanobacteria; c__Synechococcophycideae; o__Synechococcales; f__Synechococcaceae; g__Synechococcus; s__	1e-35
551717	0.269926	-3.32129	0.0298712	NA	NA	NA		k__Bacteria; p__Cyanobacteria; c__Synechococcophycideae; o__Synechococcales; f__Synechococcaceae; g__Synechococcus; s__	2e-33
439457	2.58302	-4.20096	0.034667	NA	NA	NA		k__Bacteria; p__Firmicutes; c__Bacilli; o__Bacillales; f__[Thermicanaceae]; g__Thermicanus; s__	1e-35
4454140	0.643182	4.25811	0.04421	NA	NA	NA		k__Bacteria; p__Firmicutes; c__Bacilli; o__Bacillales; f__Bacillaceae; g__Bacillus; s__flexus	7e-37
New.ReferenceOTU9342	2.39631	4.62612	0.0310987	NA	NA	NA		k__Bacteria; p__Firmicutes; c__Bacilli; o__Bacillales; f__Staphylococcaceae; g__Jeotgalicoccus; s__	1e-07
524292	8.53382	-2.72185	5.17e-05	NA	NA	NA		k__Bacteria; p__Firmicutes; c__Bacilli; o__Bacillales; f__Staphylococcaceae; g__Staphylococcus; s__	5e-28
4014120	45.7329	-2.51027	0.000395382	NA	NA	NA		k__Bacteria; p__Firmicutes; c__Bacilli; o__Bacillales; f__Staphylococcaceae; g__Staphylococcus; s__	7e-37
496787	26.6572	-2.02477	0.00149193	NA	NA	NA		k__Bacteria; p__Firmicutes; c__Bacilli; o__Bacillales; f__Staphylococcaceae; g__Staphylococcus; s__	7e-37
989990	4.31711	-2.45013	0.00985395	NA	NA	NA		k__Bacteria; p__Firmicutes; c__Bacilli; o__Bacillales; f__Staphylococcaceae; g__Staphylococcus; s__aureus	5e-28
1102743	14.137	-2.13738	0.0228079	NA	NA	NA		k__Bacteria; p__Firmicutes; c__Bacilli; o__Bacillales; f__Staphylococcaceae; g__Staphylococcus; s__aureus	7e-37
4342860	3.73905	-3.25681	0.00269776	NA	NA	NA		k__Bacteria; p__Firmicutes; c__Bacilli; o__Gemellales; f__Gemellaceae; g__; s__	3e-39
950828	13.6574	-2.89502	0.0117634	NA	NA	NA		k__Bacteria; p__Firmicutes; c__Bacilli; o__Lactobacillales; f__Carnobacteriaceae; g__Granulicatella; s__	1e-35
New.ReferenceOTU25200	1.29816	5.97683	0.000494058	NA	NA	NA		k__Bacteria; p__Firmicutes; c__Bacilli; o__Lactobacillales; f__Streptococcaceae; g__Lactococcus; s__	2e-09
942793	5.05361	-3.43682	2.5e-08	NA	NA	NA		k__Bacteria; p__Firmicutes; c__Bacilli; o__Lactobacillales; f__Streptococcaceae; g__Streptococcus; s__	7e-27
923098	46.9193	-3.27615	3.22e-07	NA	NA	NA		k__Bacteria; p__Firmicutes; c__Bacilli; o__Lactobacillales; f__Streptococcaceae; g__Streptococcus; s__	1e-35
966828	52.5448	-2.80754	4.18e-07	NA	NA	NA		k__Bacteria; p__Firmicutes; c__Bacilli; o__Lactobacillales; f__Streptococcaceae; g__Streptococcus; s__	1e-35
971607	7.76503	-2.85655	9.92e-07	NA	NA	NA		k__Bacteria; p__Firmicutes; c__Bacilli; o__Lactobacillales; f__Streptococcaceae; g__Streptococcus; s__	7e-27
934679	1.40643	-3.56009	4.44e-06	NA	NA	NA		k__Bacteria; p__Firmicutes; c__Bacilli; o__Lactobacillales; f__Streptococcaceae; g__Streptococcus; s__	2e-30
933156	2.4996	-2.84653	5.3e-06	NA	NA	NA		k__Bacteria; p__Firmicutes; c__Bacilli; o__Lactobacillales; f__Streptococcaceae; g__Streptococcus; s__	2e-34
4437024	0.841763	-4.71397	0.0184237	NA	NA	NA		k__Bacteria; p__Firmicutes; c__Bacilli; o__Lactobacillales; f__Streptococcaceae; g__Streptococcus; s__	2e-33
3805726	3.16328	-6.71734	0.000535103	NA	NA	NA		k__Bacteria; p__Firmicutes; c__Clostridia; o__Clostridiales; f__[Mogibacteriaceae]; g__; s__	2e-34
14284	4.90659	-3.45071	0.0265308	NA	NA	NA		k__Bacteria; p__Firmicutes; c__Clostridia; o__Clostridiales; f__[Tissierellaceae]; g__Anaerococcus; s__	4e-38
New.ReferenceOTU8237	3.01719	4.37535	0.0460459	NA	NA	NA		k__Bacteria; p__Firmicutes; c__Clostridia; o__Clostridiales; f__Clostridiaceae; g__Clostridium; s__	2e-27
1099710	1.29565	-6.15485	0.00153138	NA	NA	NA		k__Bacteria; p__Firmicutes; c__Clostridia; o__Clostridiales; f__Peptococcaceae; g__Peptococcus; s__	6e-34
New.ReferenceOTU8503	NA	NA	NA	6.55086	3.75386	0.0484225		k__Bacteria; p__Firmicutes; c__Clostridia; o__Clostridiales; f__Ruminococcaceae; g__; s__	8e-18
New.ReferenceOTU31048	1.47603	5.80689	0.00103215	NA	NA	NA		k__Bacteria; p__Firmicutes; c__Clostridia; o__Clostridiales; f__Ruminococcaceae; g__; s__	2e-09
New.ReferenceOTU22106	0.527623	4.5264	0.0251692	NA	NA	NA		k__Bacteria; p__Firmicutes; c__Clostridia; o__Clostridiales; f__Ruminococcaceae; g__; s__	1e-10
New.ReferenceOTU9284	0.542853	3.36739	0.0326191	NA	NA	NA		k__Bacteria; p__Firmicutes; c__Clostridia; o__Clostridiales; f__Ruminococcaceae; g__; s__	5e-09
4402709	NA	NA	NA	8.45893	-4.20476	0.0402277		k__Bacteria; p__Firmicutes; c__Clostridia; o__Clostridiales; f__Veillonellaceae; g__Veillonella; s__dispar	1e-35
New.ReferenceOTU13479	NA	NA	NA	2.16798	4.35727	0.0273418		k__Bacteria; p__Firmicutes; c__Clostridia; o__Natranaerobiales; f__Anaerobrancaceae; g__Dethiobacter; s__	6e-25
New.ReferenceOTU36771	NA	NA	NA	1.98078	4.6456	0.0134064		k__Bacteria; p__GN02; c__3BR-5F; o__; f__; g__; s__	2e-31
New.ReferenceOTU1093	131.627	-3.44916	0.047182	NA	NA	NA		k__Bacteria; p__GN02; c__3BR-5F; o__; f__; g__; s__	1e-13
4399127	NA	NA	NA	28.2832	5.89991	0.000690419		k__Bacteria; p__GN02; c__BD1-5; o__; f__; g__; s__	2e-34
255765	12.3961	6.15404	7.14e-05	NA	NA	NA		k__Bacteria; p__GN02; c__BD1-5; o__; f__; g__; s__	2e-34
New.ReferenceOTU30660	1.45815	5.16754	0.00787127	NA	NA	NA		k__Bacteria; p__GN02; c__BD1-5; o__; f__; g__; s__	1e-29
New.ReferenceOTU32690	1.48656	3.99829	0.0246437	NA	NA	NA		k__Bacteria; p__Lentisphaerae; c__[Lentisphaeria]; o__Lentisphaerales; f__3H8; g__; s__	2e-18
4420771	29.765	4.61938	2.12e-09	NA	NA	NA		k__Bacteria; p__Lentisphaerae; c__[Lentisphaeria]; o__Lentisphaerales; f__Lentisphaeraceae; g__; s__	4e-32
New.ReferenceOTU4368	17.2632	2.97064	0.0216054	NA	NA	NA		k__Bacteria; p__Lentisphaerae; c__[Lentisphaeria]; o__Lentisphaerales; f__Lentisphaeraceae; g__; s__	6e-28
4041852	2.09968	3.43888	0.0319278	NA	NA	NA		k__Bacteria; p__Lentisphaerae; c__[Lentisphaeria]; o__Lentisphaerales; f__Lentisphaeraceae; g__; s__	1e-32
New.ReferenceOTU33874	NA	NA	NA	NA	NA	NA		k__Bacteria; p__Lentisphaerae; c__[Lentisphaeria]; o__Lentisphaerales; f__Lentisphaeraceae; g__; s__	8e-21
New.ReferenceOTU18892	1.77731	4.39076	0.00830765	NA	NA	NA		k__Bacteria; p__Lentisphaerae; c__[Lentisphaeria]; o__Lentisphaerales; f__Lentisphaeraceae; g__Lentisphaera; s__	1e-25
561699	0.660531	4.35776	0.0402839	NA	NA	NA		k__Bacteria; p__Lentisphaerae; c__[Lentisphaeria]; o__Lentisphaerales; f__Lentisphaeraceae; g__Lentisphaera; s__	4e-32
193866	NA	NA	NA	NA	NA	NA		k__Bacteria; p__Planctomycetes; c__OM190; o__agg27; f__; g__; s__	1e-35
New.ReferenceOTU18886	NA	NA	NA	3.05853	5.04458	0.00604184		k__Bacteria; p__Planctomycetes; c__Phycisphaerae; o__Phycisphaerales; f__; g__; s__	2e-28
New.ReferenceOTU9431	NA	NA	NA	7.27525	4.99942	0.00937889		k__Bacteria; p__Planctomycetes; c__Phycisphaerae; o__Phycisphaerales; f__Phycisphaeraceae; g__; s__	1e-23
555348	39.7674	-2.38313	0.012989	NA	NA	NA		k__Bacteria; p__Planctomycetes; c__Pla3; o__; f__; g__; s__	1e-38
533778	0.231818	-4.30435	0.00798495	NA	NA	NA		k__Bacteria; p__Planctomycetes; c__Planctomycetia; o__Planctomycetales; f__Planctomycetaceae; g__Planctomyces; s__	1e-35
584469	4.57003	6.35672	0.000308096	NA	NA	NA		k__Bacteria; p__Planctomycetes; c__vadinHA49; o__; f__; g__; s__	2e-37
New.ReferenceOTU929	43.0434	6.25675	4.74e-13	NA	NA	NA		k__Bacteria; p__Proteobacteria; c__; o__; f__; g__; s__	1e-28
New.ReferenceOTU7891	1.12075	5.35755	0.00393268	NA	NA	NA		k__Bacteria; p__Proteobacteria; c__; o__; f__; g__; s__	1e-19
New.ReferenceOTU29101	NA	NA	NA	4.41736	5.35419	0.0029885		k__Bacteria; p__Proteobacteria; c__Alphaproteobacteria; o__; f__; g__; s__	2e-27
New.ReferenceOTU16114	NA	NA	NA	27.3222	5.42495	0.00450071		k__Bacteria; p__Proteobacteria; c__Alphaproteobacteria; o__; f__; g__; s__	9e-24
New.ReferenceOTU16967	NA	NA	NA	3.95768	3.98901	0.0324238		k__Bacteria; p__Proteobacteria; c__Alphaproteobacteria; o__; f__; g__; s__	1e-10
New.ReferenceOTU12304	NA	NA	NA	6.01167	4.15791	0.0431537		k__Bacteria; p__Proteobacteria; c__Alphaproteobacteria; o__; f__; g__; s__	3e-30
New.ReferenceOTU34670	12.7219	5.11848	0.000150078	NA	NA	NA		k__Bacteria; p__Proteobacteria; c__Alphaproteobacteria; o__; f__; g__; s__	3e-14
1111111	26.6687	-2.56918	0.00123044	NA	NA	NA		k__Bacteria; p__Proteobacteria; c__Alphaproteobacteria; o__; f__; g__; s__	1e-32
204451	5.83131	-3.06905	0.00365176	NA	NA	NA		k__Bacteria; p__Proteobacteria; c__Alphaproteobacteria; o__; f__; g__; s__	1e-35
150615	27.8335	-1.76059	0.00491381	NA	NA	NA		k__Bacteria; p__Proteobacteria; c__Alphaproteobacteria; o__; f__; g__; s__	4e-38
New.ReferenceOTU34640	6.63055	-2.167	0.00753852	NA	NA	NA		k__Bacteria; p__Proteobacteria; c__Alphaproteobacteria; o__; f__; g__; s__	7e-24
New.ReferenceOTU110	7.22405	4.73482	0.0256119	NA	NA	NA		k__Bacteria; p__Proteobacteria; c__Alphaproteobacteria; o__; f__; g__; s__	2e-28
315011	11.7706	-2.28686	0.0486145	NA	NA	NA		k__Bacteria; p__Proteobacteria; c__Alphaproteobacteria; o__; f__; g__; s__	4e-38
New.ReferenceOTU10898	NA	NA	NA	3.95984	5.47217	0.00170158		k__Bacteria; p__Proteobacteria; c__Alphaproteobacteria; o__BD7-3; f__; g__; s__	5e-13
New.ReferenceOTU34729	NA	NA	NA	36.5388	5.30948	0.00604184		k__Bacteria; p__Proteobacteria; c__Alphaproteobacteria; o__BD7-3; f__; g__; s__	6e-31
352556	NA	NA	NA	7.21834	4.95767	0.0102147		k__Bacteria; p__Proteobacteria; c__Alphaproteobacteria; o__BD7-3; f__; g__; s__	4e-38
1118618	NA	NA	NA	4.15289	4.74441	0.0140601		k__Bacteria; p__Proteobacteria; c__Alphaproteobacteria; o__BD7-3; f__; g__; s__	1e-35
4345424	NA	NA	NA	3.38968	4.54611	0.0205462		k__Bacteria; p__Proteobacteria; c__Alphaproteobacteria; o__BD7-3; f__; g__; s__	4e-38
New.ReferenceOTU2660	17.2998	4.01343	0.038032	NA	NA	NA		k__Bacteria; p__Proteobacteria; c__Alphaproteobacteria; o__BD7-3; f__; g__; s__	2e-28
4301195	NA	NA	NA	403.632	-1.43347	0.0369669		k__Bacteria; p__Proteobacteria; c__Alphaproteobacteria; o__Caulobacterales; f__Caulobacteraceae; g__; s__	1e-35
4466825	2.5764	-4.96174	0.0159538	NA	NA	NA		k__Bacteria; p__Proteobacteria; c__Alphaproteobacteria; o__Caulobacterales; f__Caulobacteraceae; g__; s__	1e-35
1126427	0.77683	4.64974	0.0241322	NA	NA	NA		k__Bacteria; p__Proteobacteria; c__Alphaproteobacteria; o__Caulobacterales; f__Caulobacteraceae; g__; s__	1e-35
1123028	10.3493	-2.60907	0.0448888	NA	NA	NA		k__Bacteria; p__Proteobacteria; c__Alphaproteobacteria; o__Caulobacterales; f__Caulobacteraceae; g__Brevundimonas; s__diminuta	1e-35
4351392	2.01231	-6.14016	0.0128351	NA	NA	NA		k__Bacteria; p__Proteobacteria; c__Alphaproteobacteria; o__Caulobacterales; f__Caulobacteraceae; g__Phenylobacterium; s__	1e-35
1105731	79.4015	4.88111	1.41e-06	NA	NA	NA		k__Bacteria; p__Proteobacteria; c__Alphaproteobacteria; o__Kiloniellales; f__; g__; s__	1e-35
316776	11.0385	5.213	0.000187307	NA	NA	NA		k__Bacteria; p__Proteobacteria; c__Alphaproteobacteria; o__Kiloniellales; f__; g__; s__	3e-33
New.ReferenceOTU30303	3.16052	4.15814	0.0166882	NA	NA	NA		k__Bacteria; p__Proteobacteria; c__Alphaproteobacteria; o__Kiloniellales; f__; g__; s__	2e-24
269245	1.05545	4.35912	0.0445602	NA	NA	NA		k__Bacteria; p__Proteobacteria; c__Alphaproteobacteria; o__Kiloniellales; f__; g__; s__	1e-35
2672867	NA	NA	NA	3.72359	5.37865	0.00239776		k__Bacteria; p__Proteobacteria; c__Alphaproteobacteria; o__Kordiimonadales; f__; g__; s__	4e-38
3650414	NA	NA	NA	3.55234	5.47595	0.00156209		k__Bacteria; p__Proteobacteria; c__Alphaproteobacteria; o__Kordiimonadales; f__Kordiimonadaceae; g__; s__	4e-38
824057	7.98259	5.2933	3.06e-05	NA	NA	NA		k__Bacteria; p__Proteobacteria; c__Alphaproteobacteria; o__Kordiimonadales; f__Kordiimonadaceae; g__; s__	1e-35
New.ReferenceOTU17385	10.9313	5.15576	0.00246884	NA	NA	NA		k__Bacteria; p__Proteobacteria; c__Alphaproteobacteria; o__Kordiimonadales; f__Kordiimonadaceae; g__; s__	6e-31
4429516	2.74153	3.83048	0.0306093	NA	NA	NA		k__Bacteria; p__Proteobacteria; c__Alphaproteobacteria; o__Kordiimonadales; f__Kordiimonadaceae; g__; s__	3e-33
510320	3.24298	-2.85005	0.0418031	NA	NA	NA		k__Bacteria; p__Proteobacteria; c__Alphaproteobacteria; o__Rhizobiales; f__; g__; s__	4e-38
4322207	43.7461	-1.77923	0.00039378	NA	NA	NA		k__Bacteria; p__Proteobacteria; c__Alphaproteobacteria; o__Rhizobiales; f__Bradyrhizobiaceae; g__; s__	7e-37
579421	NA	NA	NA	2.13431	-4.04993	0.0433498		k__Bacteria; p__Proteobacteria; c__Alphaproteobacteria; o__Rhizobiales; f__Hyphomicrobiaceae; g__; s__	7e-37
808440	NA	NA	NA	6.12607	4.84196	0.0126225		k__Bacteria; p__Proteobacteria; c__Alphaproteobacteria; o__Rhizobiales; f__Hyphomicrobiaceae; g__Devosia; s__	4e-38
239537	NA	NA	NA	29.8224	-1.59313	0.048388		k__Bacteria; p__Proteobacteria; c__Alphaproteobacteria; o__Rhizobiales; f__Hyphomicrobiaceae; g__Hyphomicrobium; s__	4e-35
107137	0.553656	-4.57725	0.0465401	NA	NA	NA		k__Bacteria; p__Proteobacteria; c__Alphaproteobacteria; o__Rhizobiales; f__Methylobacteriaceae; g__Methylobacterium; s__	1e-35
1074248	0.82951	-5.78554	0.00120149	NA	NA	NA		k__Bacteria; p__Proteobacteria; c__Alphaproteobacteria; o__Rhizobiales; f__Methylobacteriaceae; g__Methylobacterium; s__adhaesivum	1e-35
4323871	0.773569	-5.33481	0.0113628	NA	NA	NA		k__Bacteria; p__Proteobacteria; c__Alphaproteobacteria; o__Rhizobiales; f__Methylobacteriaceae; g__Methylobacterium; s__komagatae	1e-35
369965	NA	NA	NA	8.04359	2.49761	0.0400578		k__Bacteria; p__Proteobacteria; c__Alphaproteobacteria; o__Rhizobiales; f__Phyllobacteriaceae; g__; s__	7e-27
1118994	0.982229	4.4442	0.0125209	NA	NA	NA		k__Bacteria; p__Proteobacteria; c__Alphaproteobacteria; o__Rhizobiales; f__Phyllobacteriaceae; g__; s__	1e-35
248526	0.763862	4.63738	0.0241876	NA	NA	NA		k__Bacteria; p__Proteobacteria; c__Alphaproteobacteria; o__Rhizobiales; f__Phyllobacteriaceae; g__; s__	1e-35
New.ReferenceOTU23132	0.641164	4.39164	0.0363939	NA	NA	NA		k__Bacteria; p__Proteobacteria; c__Alphaproteobacteria; o__Rhizobiales; f__Phyllobacteriaceae; g__; s__	2e-28
573796	NA	NA	NA	5.66388	5.48179	0.00235815		k__Bacteria; p__Proteobacteria; c__Alphaproteobacteria; o__Rhodobacterales; f__Hyphomonadaceae; g__; s__	1e-35
309877	NA	NA	NA	2.13982	4.66202	0.0131893		k__Bacteria; p__Proteobacteria; c__Alphaproteobacteria; o__Rhodobacterales; f__Hyphomonadaceae; g__; s__	3e-30
New.ReferenceOTU4950	NA	NA	NA	3.08271	4.04408	0.0489893		k__Bacteria; p__Proteobacteria; c__Alphaproteobacteria; o__Rhodobacterales; f__Hyphomonadaceae; g__; s__	4e-29
4483491	1.02505	5.23794	0.00598581	NA	NA	NA		k__Bacteria; p__Proteobacteria; c__Alphaproteobacteria; o__Rhodobacterales; f__Hyphomonadaceae; g__; s__	4e-38
New.ReferenceOTU2937	1.83491	4.64474	0.00861359	NA	NA	NA		k__Bacteria; p__Proteobacteria; c__Alphaproteobacteria; o__Rhodobacterales; f__Hyphomonadaceae; g__; s__	6e-31
135262	NA	NA	NA	6.9258	4.43025	0.00532311		k__Bacteria; p__Proteobacteria; c__Alphaproteobacteria; o__Rhodobacterales; f__Hyphomonadaceae; g__Maricaulis; s__	1e-35
New.ReferenceOTU21010	NA	NA	NA	6.92623	5.15033	0.00124568		k__Bacteria; p__Proteobacteria; c__Alphaproteobacteria; o__Rhodobacterales; f__Rhodobacteraceae; g__; s__	9e-24
4350099	NA	NA	NA	188.464	1.58825	0.0181659		k__Bacteria; p__Proteobacteria; c__Alphaproteobacteria; o__Rhodobacterales; f__Rhodobacteraceae; g__; s__	1e-35
New.ReferenceOTU36501	NA	NA	NA	1.73116	4.47947	0.0188555		k__Bacteria; p__Proteobacteria; c__Alphaproteobacteria; o__Rhodobacterales; f__Rhodobacteraceae; g__; s__	3e-20
3876492	NA	NA	NA	2.06373	3.71306	0.033599		k__Bacteria; p__Proteobacteria; c__Alphaproteobacteria; o__Rhodobacterales; f__Rhodobacteraceae; g__; s__	2e-34
New.ReferenceOTU34620	NA	NA	NA	1.31655	4.16074	0.0343856		k__Bacteria; p__Proteobacteria; c__Alphaproteobacteria; o__Rhodobacterales; f__Rhodobacteraceae; g__; s__	1e-28
New.ReferenceOTU307	NA	NA	NA	6.64898	4.31125	0.0348779		k__Bacteria; p__Proteobacteria; c__Alphaproteobacteria; o__Rhodobacterales; f__Rhodobacteraceae; g__; s__	2e-09
New.ReferenceOTU4094	NA	NA	NA	3.73904	3.91459	0.039465		k__Bacteria; p__Proteobacteria; c__Alphaproteobacteria; o__Rhodobacterales; f__Rhodobacteraceae; g__; s__	4e-32
1531634	97.6683	5.49239	3.19e-09	NA	NA	NA		k__Bacteria; p__Proteobacteria; c__Alphaproteobacteria; o__Rhodobacterales; f__Rhodobacteraceae; g__; s__	1e-35
364960	88.7342	5.59521	8.32e-09	NA	NA	NA		k__Bacteria; p__Proteobacteria; c__Alphaproteobacteria; o__Rhodobacterales; f__Rhodobacteraceae; g__; s__	1e-35
4364593	20.0672	7.15218	4.58e-07	NA	NA	NA		k__Bacteria; p__Proteobacteria; c__Alphaproteobacteria; o__Rhodobacterales; f__Rhodobacteraceae; g__; s__	4e-38
4352594	6.88881	7.17002	1.07e-05	NA	NA	NA		k__Bacteria; p__Proteobacteria; c__Alphaproteobacteria; o__Rhodobacterales; f__Rhodobacteraceae; g__; s__	1e-35
319453	8.73011	6.16199	0.000541089	NA	NA	NA		k__Bacteria; p__Proteobacteria; c__Alphaproteobacteria; o__Rhodobacterales; f__Rhodobacteraceae; g__; s__	2e-37
130930	1.17348	4.23919	0.000703012	NA	NA	NA		k__Bacteria; p__Proteobacteria; c__Alphaproteobacteria; o__Rhodobacterales; f__Rhodobacteraceae; g__; s__	1e-35
215772	16.2844	4.61283	0.00198835	NA	NA	NA		k__Bacteria; p__Proteobacteria; c__Alphaproteobacteria; o__Rhodobacterales; f__Rhodobacteraceae; g__; s__	6e-31
4420077	38.1861	4.77785	0.00245583	NA	NA	NA		k__Bacteria; p__Proteobacteria; c__Alphaproteobacteria; o__Rhodobacterales; f__Rhodobacteraceae; g__; s__	4e-38
1124748	3.837	5.14086	0.0025869	NA	NA	NA		k__Bacteria; p__Proteobacteria; c__Alphaproteobacteria; o__Rhodobacterales; f__Rhodobacteraceae; g__; s__	2e-37
4306551	0.628225	5.20057	0.00510505	NA	NA	NA		k__Bacteria; p__Proteobacteria; c__Alphaproteobacteria; o__Rhodobacterales; f__Rhodobacteraceae; g__; s__	1e-35
279314	4.92539	4.23464	0.00817221	NA	NA	NA		k__Bacteria; p__Proteobacteria; c__Alphaproteobacteria; o__Rhodobacterales; f__Rhodobacteraceae; g__; s__	1e-35
1146588	1.16434	4.91833	0.0152276	NA	NA	NA		k__Bacteria; p__Proteobacteria; c__Alphaproteobacteria; o__Rhodobacterales; f__Rhodobacteraceae; g__; s__	4e-38
New.ReferenceOTU7643	1.12598	4.9054	0.0154306	NA	NA	NA		k__Bacteria; p__Proteobacteria; c__Alphaproteobacteria; o__Rhodobacterales; f__Rhodobacteraceae; g__; s__	2e-30
567410	0.894552	4.72276	0.0215356	NA	NA	NA		k__Bacteria; p__Proteobacteria; c__Alphaproteobacteria; o__Rhodobacterales; f__Rhodobacteraceae; g__; s__	1e-35
304260	22.8049	-1.83262	0.022073	NA	NA	NA		k__Bacteria; p__Proteobacteria; c__Alphaproteobacteria; o__Rhodobacterales; f__Rhodobacteraceae; g__; s__	1e-35
853083	4.74559	-4.31744	0.0222359	NA	NA	NA		k__Bacteria; p__Proteobacteria; c__Alphaproteobacteria; o__Rhodobacterales; f__Rhodobacteraceae; g__; s__	1e-35
New.ReferenceOTU26676	2.46097	3.38311	0.0266671	NA	NA	NA		k__Bacteria; p__Proteobacteria; c__Alphaproteobacteria; o__Rhodobacterales; f__Rhodobacteraceae; g__; s__	6e-34
544324	0.554315	4.4615	0.0326191	NA	NA	NA		k__Bacteria; p__Proteobacteria; c__Alphaproteobacteria; o__Rhodobacterales; f__Rhodobacteraceae; g__; s__	1e-35
2812832	0.601679	3.72803	0.0345265	NA	NA	NA		k__Bacteria; p__Proteobacteria; c__Alphaproteobacteria; o__Rhodobacterales; f__Rhodobacteraceae; g__; s__	2e-33
New.ReferenceOTU22400	6.65034	4.31652	0.0457025	NA	NA	NA		k__Bacteria; p__Proteobacteria; c__Alphaproteobacteria; o__Rhodobacterales; f__Rhodobacteraceae; g__; s__	5e-10
646866	0.49402	4.24695	0.0478434	NA	NA	NA		k__Bacteria; p__Proteobacteria; c__Alphaproteobacteria; o__Rhodobacterales; f__Rhodobacteraceae; g__; s__	9e-27
4402516	0.374342	4.18015	0.0492273	NA	NA	NA		k__Bacteria; p__Proteobacteria; c__Alphaproteobacteria; o__Rhodobacterales; f__Rhodobacteraceae; g__; s__	1e-35
2785329	4.71974	5.93587	1.33e-05	NA	NA	NA		k__Bacteria; p__Proteobacteria; c__Alphaproteobacteria; o__Rhodobacterales; f__Rhodobacteraceae; g__Anaerospora; s__	1e-35
New.ReferenceOTU20593	NA	NA	NA	2.64842	3.94983	0.0236848		k__Bacteria; p__Proteobacteria; c__Alphaproteobacteria; o__Rhodobacterales; f__Rhodobacteraceae; g__Nautella; s__	4e-26
New.ReferenceOTU13950	4.4642	6.33839	0.000311237	NA	NA	NA		k__Bacteria; p__Proteobacteria; c__Alphaproteobacteria; o__Rhodobacterales; f__Rhodobacteraceae; g__Rhodobacter; s__	1e-22
822584	398.866	6.10222	4.36e-22	NA	NA	NA		k__Bacteria; p__Proteobacteria; c__Alphaproteobacteria; o__Rhodobacterales; f__Rhodobacteraceae; g__Thalassobius; s__	2e-34
337783	161.203	5.21086	0.000194614	NA	NA	NA		k__Bacteria; p__Proteobacteria; c__Alphaproteobacteria; o__Rhodobacterales; f__Rhodobacteraceae; g__Thalassobius; s__	2e-34
4421429	1.02969	5.37815	0.0041082	NA	NA	NA		k__Bacteria; p__Proteobacteria; c__Alphaproteobacteria; o__Rhodobacterales; f__Rhodobacteraceae; g__Thalassobius; s__	4e-32
New.ReferenceOTU33215	16.3345	3.9197	0.0326191	NA	NA	NA		k__Bacteria; p__Proteobacteria; c__Alphaproteobacteria; o__Rhodobacterales; f__Rhodobacteraceae; g__Thalassobius; s__	5e-25
New.ReferenceOTU11934	0.735255	4.41393	0.0350084	NA	NA	NA		k__Bacteria; p__Proteobacteria; c__Alphaproteobacteria; o__Rhodobacterales; f__Rhodobacteraceae; g__Thalassobius; s__	3e-23
New.ReferenceOTU16576	24.8835	5.83961	2.13e-06	NA	NA	NA		k__Bacteria; p__Proteobacteria; c__Alphaproteobacteria; o__Rhodospirillales; f__Rhodospirillaceae; g__; s__	2e-12
New.ReferenceOTU24635	11.5177	4.39982	0.0111581	NA	NA	NA		k__Bacteria; p__Proteobacteria; c__Alphaproteobacteria; o__Rhodospirillales; f__Rhodospirillaceae; g__; s__	2e-27
244564	0.824551	4.88926	0.0141889	NA	NA	NA		k__Bacteria; p__Proteobacteria; c__Alphaproteobacteria; o__Rhodospirillales; f__Rhodospirillaceae; g__; s__	1e-35
New.ReferenceOTU15689	NA	NA	NA	6.22176	4.26492	0.0372077		k__Bacteria; p__Proteobacteria; c__Alphaproteobacteria; o__Rickettsiales; f__; g__; s__	6e-25
365956	19.4259	-4.05844	0.00108915	NA	NA	NA		k__Bacteria; p__Proteobacteria; c__Alphaproteobacteria; o__Rickettsiales; f__; g__; s__	7e-37
New.ReferenceOTU23050	9.62945	5.51872	0.00111384	NA	NA	NA		k__Bacteria; p__Proteobacteria; c__Alphaproteobacteria; o__Rickettsiales; f__; g__; s__	6e-25
230094	217.999	-2.44009	5.29e-09	NA	NA	NA		k__Bacteria; p__Proteobacteria; c__Alphaproteobacteria; o__Rickettsiales; f__Pelagibacteraceae; g__; s__	4e-38
307148	42.1616	-2.38266	0.000360881	NA	NA	NA		k__Bacteria; p__Proteobacteria; c__Alphaproteobacteria; o__Rickettsiales; f__Pelagibacteraceae; g__; s__	4e-38
227854	22.3717	-2.86825	0.00062151	NA	NA	NA		k__Bacteria; p__Proteobacteria; c__Alphaproteobacteria; o__Rickettsiales; f__Pelagibacteraceae; g__; s__	4e-38
4413193	0.58631	-4.26452	0.00115368	NA	NA	NA		k__Bacteria; p__Proteobacteria; c__Alphaproteobacteria; o__Rickettsiales; f__Pelagibacteraceae; g__; s__	4e-38
3347507	27.0865	-2.80566	0.00120149	NA	NA	NA		k__Bacteria; p__Proteobacteria; c__Alphaproteobacteria; o__Rickettsiales; f__Pelagibacteraceae; g__; s__	4e-38
4461947	8.33195	-3.08593	0.00241685	NA	NA	NA		k__Bacteria; p__Proteobacteria; c__Alphaproteobacteria; o__Rickettsiales; f__Pelagibacteraceae; g__; s__	3e-33
New.ReferenceOTU16935	1.40458	-2.9439	0.00608121	NA	NA	NA		k__Bacteria; p__Proteobacteria; c__Alphaproteobacteria; o__Rickettsiales; f__Pelagibacteraceae; g__; s__	2e-24
4338687	5.44347	-2.48806	0.0305671	NA	NA	NA		k__Bacteria; p__Proteobacteria; c__Alphaproteobacteria; o__Rickettsiales; f__Pelagibacteraceae; g__; s__	1e-35
4393178	9.91465	-2.53677	0.035442	NA	NA	NA		k__Bacteria; p__Proteobacteria; c__Alphaproteobacteria; o__Rickettsiales; f__Pelagibacteraceae; g__; s__	4e-38
1139954	0.322725	-2.59235	0.0374849	NA	NA	NA		k__Bacteria; p__Proteobacteria; c__Alphaproteobacteria; o__Rickettsiales; f__Pelagibacteraceae; g__; s__	4e-38
New.ReferenceOTU20245	NA	NA	NA	49.5299	5.92456	0.00143045		k__Bacteria; p__Proteobacteria; c__Alphaproteobacteria; o__Rickettsiales; f__Rickettsiaceae; g__; s__	9e-21
New.ReferenceOTU3737	NA	NA	NA	7.75141	4.92128	0.0113152		k__Bacteria; p__Proteobacteria; c__Alphaproteobacteria; o__Rickettsiales; f__Rickettsiaceae; g__; s__	1e-16
New.ReferenceOTU10973	NA	NA	NA	2.87865	4.3099	0.0318936		k__Bacteria; p__Proteobacteria; c__Alphaproteobacteria; o__Rickettsiales; f__Rickettsiaceae; g__; s__	2e-24
New.ReferenceOTU10621	NA	NA	NA	290.112	4.34172	0.0335376		k__Bacteria; p__Proteobacteria; c__Alphaproteobacteria; o__Rickettsiales; f__Rickettsiaceae; g__; s__	2e-28
New.ReferenceOTU5484	342.011	5.62757	1.05e-06	NA	NA	NA		k__Bacteria; p__Proteobacteria; c__Alphaproteobacteria; o__Rickettsiales; f__Rickettsiaceae; g__; s__	6e-31
New.ReferenceOTU6229	3.10266	5.78295	0.00173613	NA	NA	NA		k__Bacteria; p__Proteobacteria; c__Alphaproteobacteria; o__Rickettsiales; f__Rickettsiaceae; g__; s__	4e-26
New.ReferenceOTU36085	2.02522	4.8066	0.0174009	NA	NA	NA		k__Bacteria; p__Proteobacteria; c__Alphaproteobacteria; o__Rickettsiales; f__Rickettsiaceae; g__; s__	3e-20
New.ReferenceOTU24061	144.589	4.74409	0.0300104	NA	NA	NA		k__Bacteria; p__Proteobacteria; c__Alphaproteobacteria; o__Rickettsiales; f__Rickettsiaceae; g__; s__	2e-21
254127	2.44881	4.0134	0.0340627	NA	NA	NA		k__Bacteria; p__Proteobacteria; c__Alphaproteobacteria; o__Rickettsiales; f__Rickettsiaceae; g__; s__	1e-35
201204	0.950042	4.37601	0.04131	NA	NA	NA		k__Bacteria; p__Proteobacteria; c__Alphaproteobacteria; o__Rickettsiales; f__Rickettsiaceae; g__; s__	1e-35
New.ReferenceOTU7382	NA	NA	NA	NA	NA	NA		k__Bacteria; p__Proteobacteria; c__Alphaproteobacteria; o__Rickettsiales; f__Rickettsiaceae; g__; s__	3e-23
New.ReferenceOTU34837	7.19355	5.40966	0.000748437	NA	NA	NA		k__Bacteria; p__Proteobacteria; c__Alphaproteobacteria; o__Rickettsiales; f__Rickettsiaceae; g__Rickettsia; s__	5e-13
New.ReferenceOTU33280	1.14887	4.74566	0.0200112	NA	NA	NA		k__Bacteria; p__Proteobacteria; c__Alphaproteobacteria; o__Rickettsiales; f__Rickettsiaceae; g__Rickettsia; s__	3e-08
342165	104.538	-2.47982	4.01e-10	NA	NA	NA		k__Bacteria; p__Proteobacteria; c__Alphaproteobacteria; o__Sphingomonadales; f__; g__; s__	4e-38
4393790	4.69435	-2.00259	0.000542517	NA	NA	NA		k__Bacteria; p__Proteobacteria; c__Alphaproteobacteria; o__Sphingomonadales; f__; g__; s__	5e-28
355076	0.437824	-4.18011	0.0103131	NA	NA	NA		k__Bacteria; p__Proteobacteria; c__Alphaproteobacteria; o__Sphingomonadales; f__; g__; s__	1e-35
347378	5.6579	-3.15985	0.0124164	NA	NA	NA		k__Bacteria; p__Proteobacteria; c__Alphaproteobacteria; o__Sphingomonadales; f__; g__; s__	1e-35
1109435	NA	NA	NA	NA	NA	NA		k__Bacteria; p__Proteobacteria; c__Alphaproteobacteria; o__Sphingomonadales; f__Erythrobacteraceae; g__; s__	7e-37
4457555	NA	NA	NA	57.5986	4.79474	0.00726495		k__Bacteria; p__Proteobacteria; c__Alphaproteobacteria; o__Sphingomonadales; f__Sphingomonadaceae; g__; s__	7e-37
647864	6.39446	-3.94518	0.00499493	NA	NA	NA		k__Bacteria; p__Proteobacteria; c__Alphaproteobacteria; o__Sphingomonadales; f__Sphingomonadaceae; g__; s__	1e-35
4319587	0.832426	-5.16751	0.011584	NA	NA	NA		k__Bacteria; p__Proteobacteria; c__Alphaproteobacteria; o__Sphingomonadales; f__Sphingomonadaceae; g__Novosphingobium; s__	4e-38
1553204	1.54529	-5.018	0.0162979	NA	NA	NA		k__Bacteria; p__Proteobacteria; c__Alphaproteobacteria; o__Sphingomonadales; f__Sphingomonadaceae; g__Sphingomonas; s__	2e-34
New.ReferenceOTU23441	NA	NA	NA	9.37596	-3.00666	0.0301035		k__Bacteria; p__Proteobacteria; c__Betaproteobacteria; o__Burkholderiales; f__Comamonadaceae; g__; s__	1e-32
New.ReferenceOTU10010	6.40518	-2.31936	1.38e-05	NA	NA	NA		k__Bacteria; p__Proteobacteria; c__Betaproteobacteria; o__Burkholderiales; f__Comamonadaceae; g__; s__	2e-24
781055	35.7703	-1.98396	0.000163643	NA	NA	NA		k__Bacteria; p__Proteobacteria; c__Betaproteobacteria; o__Burkholderiales; f__Comamonadaceae; g__; s__	7e-37
803885	4.29358	-1.7622	0.00182107	NA	NA	NA		k__Bacteria; p__Proteobacteria; c__Betaproteobacteria; o__Burkholderiales; f__Comamonadaceae; g__; s__	2e-34
4377842	3.05242	-4.44494	0.00996524	NA	NA	NA		k__Bacteria; p__Proteobacteria; c__Betaproteobacteria; o__Burkholderiales; f__Comamonadaceae; g__; s__	7e-37
4418260	32.5661	-1.76569	0.0110168	NA	NA	NA		k__Bacteria; p__Proteobacteria; c__Betaproteobacteria; o__Burkholderiales; f__Comamonadaceae; g__; s__	7e-37
4388963	1.13945	-1.65876	0.0246791	NA	NA	NA		k__Bacteria; p__Proteobacteria; c__Betaproteobacteria; o__Burkholderiales; f__Comamonadaceae; g__; s__	2e-34
New.ReferenceOTU8983	0.215462	-3.10474	0.0400749	NA	NA	NA		k__Bacteria; p__Proteobacteria; c__Betaproteobacteria; o__Burkholderiales; f__Comamonadaceae; g__; s__	3e-23
4383166	7.14948	-2.34985	0.0457234	NA	NA	NA		k__Bacteria; p__Proteobacteria; c__Betaproteobacteria; o__Burkholderiales; f__Comamonadaceae; g__; s__	7e-37
813575	2.2512	-2.30442	0.00183974	NA	NA	NA		k__Bacteria; p__Proteobacteria; c__Betaproteobacteria; o__Burkholderiales; f__Comamonadaceae; g__Methylibium; s__	4e-32
119723	0.571745	-5.6208	0.00472863	NA	NA	NA		k__Bacteria; p__Proteobacteria; c__Betaproteobacteria; o__Burkholderiales; f__Comamonadaceae; g__Simplicispira; s__	7e-37
563550	NA	NA	NA	5.73537	2.75186	0.0257075		k__Bacteria; p__Proteobacteria; c__Betaproteobacteria; o__Burkholderiales; f__Oxalobacteraceae; g__Ralstonia; s__	7e-37
New.ReferenceOTU5151	NA	NA	NA	1.97273	3.22439	0.0459249		k__Bacteria; p__Proteobacteria; c__Betaproteobacteria; o__Methylophilales; f__Methylophilaceae; g__; s__	1e-22
New.ReferenceOTU27867	NA	NA	NA	3.9464	4.70031	0.0155017		k__Bacteria; p__Proteobacteria; c__Betaproteobacteria; o__Neisseriales; f__Neisseriaceae; g__; s__	6e-18
New.ReferenceOTU26206	NA	NA	NA	53.8114	6.02229	0.00110302		k__Bacteria; p__Proteobacteria; c__Betaproteobacteria; o__Procabacteriales; f__Procabacteriaceae; g__; s__	6e-12
4375268	493.546	-2.31936	1.16e-08	NA	NA	NA		k__Bacteria; p__Proteobacteria; c__Betaproteobacteria; o__Procabacteriales; f__Procabacteriaceae; g__; s__	6e-34
4361424	91.7842	-2.03195	1.54e-07	NA	NA	NA		k__Bacteria; p__Proteobacteria; c__Betaproteobacteria; o__Procabacteriales; f__Procabacteriaceae; g__; s__	1e-25
1116921	12.777	-2.33323	3.07e-06	NA	NA	NA		k__Bacteria; p__Proteobacteria; c__Betaproteobacteria; o__Procabacteriales; f__Procabacteriaceae; g__; s__	3e-33
New.ReferenceOTU30651	1.11145	-2.38666	0.00166442	NA	NA	NA		k__Bacteria; p__Proteobacteria; c__Betaproteobacteria; o__Procabacteriales; f__Procabacteriaceae; g__; s__	3e-23
New.ReferenceOTU11781	1.43202	-2.31117	0.0033508	NA	NA	NA		k__Bacteria; p__Proteobacteria; c__Betaproteobacteria; o__Procabacteriales; f__Procabacteriaceae; g__; s__	3e-23
New.ReferenceOTU2016	0.72573	-2.67273	0.00431192	NA	NA	NA		k__Bacteria; p__Proteobacteria; c__Betaproteobacteria; o__Procabacteriales; f__Procabacteriaceae; g__; s__	3e-23
New.ReferenceOTU33332	1.22521	-1.97396	0.00476988	NA	NA	NA		k__Bacteria; p__Proteobacteria; c__Betaproteobacteria; o__Procabacteriales; f__Procabacteriaceae; g__; s__	3e-23
New.ReferenceOTU34988	0.576146	-2.62671	0.00782792	NA	NA	NA		k__Bacteria; p__Proteobacteria; c__Betaproteobacteria; o__Procabacteriales; f__Procabacteriaceae; g__; s__	3e-23
New.ReferenceOTU11592	0.562138	-2.89401	0.0105503	NA	NA	NA		k__Bacteria; p__Proteobacteria; c__Betaproteobacteria; o__Procabacteriales; f__Procabacteriaceae; g__; s__	3e-23
New.ReferenceOTU13164	1.57144	-1.85197	0.0160906	NA	NA	NA		k__Bacteria; p__Proteobacteria; c__Betaproteobacteria; o__Procabacteriales; f__Procabacteriaceae; g__; s__	7e-24
New.ReferenceOTU17863	0.762386	-2.25337	0.0164322	NA	NA	NA		k__Bacteria; p__Proteobacteria; c__Betaproteobacteria; o__Procabacteriales; f__Procabacteriaceae; g__; s__	3e-23
New.ReferenceOTU33408	0.328188	-2.83432	0.0171706	NA	NA	NA		k__Bacteria; p__Proteobacteria; c__Betaproteobacteria; o__Procabacteriales; f__Procabacteriaceae; g__; s__	3e-23
New.ReferenceOTU12094	0.566546	-3.05731	0.0171778	NA	NA	NA		k__Bacteria; p__Proteobacteria; c__Betaproteobacteria; o__Procabacteriales; f__Procabacteriaceae; g__; s__	4e-29
New.ReferenceOTU5733	0.509639	-2.71461	0.0201973	NA	NA	NA		k__Bacteria; p__Proteobacteria; c__Betaproteobacteria; o__Procabacteriales; f__Procabacteriaceae; g__; s__	7e-24
New.ReferenceOTU9156	1.31394	-1.78832	0.020785	NA	NA	NA		k__Bacteria; p__Proteobacteria; c__Betaproteobacteria; o__Procabacteriales; f__Procabacteriaceae; g__; s__	3e-23
New.ReferenceOTU4704	1.31504	-1.88257	0.0221559	NA	NA	NA		k__Bacteria; p__Proteobacteria; c__Betaproteobacteria; o__Procabacteriales; f__Procabacteriaceae; g__; s__	3e-23
New.ReferenceOTU30078	0.171644	-4.79123	0.0233032	NA	NA	NA		k__Bacteria; p__Proteobacteria; c__Betaproteobacteria; o__Procabacteriales; f__Procabacteriaceae; g__; s__	4e-29
New.ReferenceOTU13770	0.244526	-2.73734	0.0261046	NA	NA	NA		k__Bacteria; p__Proteobacteria; c__Betaproteobacteria; o__Procabacteriales; f__Procabacteriaceae; g__; s__	7e-24
New.ReferenceOTU12936	1.05671	-1.60112	0.0320185	NA	NA	NA		k__Bacteria; p__Proteobacteria; c__Betaproteobacteria; o__Procabacteriales; f__Procabacteriaceae; g__; s__	3e-23
New.ReferenceOTU11418	1.04211	-1.95086	0.0354215	NA	NA	NA		k__Bacteria; p__Proteobacteria; c__Betaproteobacteria; o__Procabacteriales; f__Procabacteriaceae; g__; s__	3e-23
New.ReferenceOTU19548	1.47571	-1.452	0.0382239	NA	NA	NA		k__Bacteria; p__Proteobacteria; c__Betaproteobacteria; o__Procabacteriales; f__Procabacteriaceae; g__; s__	2e-31
New.ReferenceOTU30767	2.82017	-1.18921	0.0388491	NA	NA	NA		k__Bacteria; p__Proteobacteria; c__Betaproteobacteria; o__Procabacteriales; f__Procabacteriaceae; g__; s__	4e-32
New.ReferenceOTU2953	0.361882	-2.81219	0.0430404	NA	NA	NA		k__Bacteria; p__Proteobacteria; c__Betaproteobacteria; o__Procabacteriales; f__Procabacteriaceae; g__; s__	4e-29
New.ReferenceOTU32589	0.527714	-2.02026	0.0443447	NA	NA	NA		k__Bacteria; p__Proteobacteria; c__Betaproteobacteria; o__Procabacteriales; f__Procabacteriaceae; g__; s__	3e-23
745157	17.4475	-1.38993	0.0141666	NA	NA	NA		k__Bacteria; p__Proteobacteria; c__Betaproteobacteria; o__Rhodocyclales; f__Rhodocyclaceae; g__; s__	2e-34
148429	NA	NA	NA	12.4431	-4.1541	0.0340226		k__Bacteria; p__Proteobacteria; c__Deltaproteobacteria; o__; f__; g__; s__	2e-34
New.ReferenceOTU34871	NA	NA	NA	1.61285	4.07687	0.04168		k__Bacteria; p__Proteobacteria; c__Deltaproteobacteria; o__; f__; g__; s__	3e-20
New.ReferenceOTU19396	28.9414	6.09537	6.45e-06	NA	NA	NA		k__Bacteria; p__Proteobacteria; c__Deltaproteobacteria; o__; f__; g__; s__	8e-18
New.ReferenceOTU18957	NA	NA	NA	58.0555	-4.10051	0.00261737		k__Bacteria; p__Proteobacteria; c__Deltaproteobacteria; o__[Entotheonellales]; f__[Entotheonellaceae]; g__; s__	1e-22
New.ReferenceOTU8205	NA	NA	NA	23.8311	4.46166	0.0293058		k__Bacteria; p__Proteobacteria; c__Deltaproteobacteria; o__Bdellovibrionales; f__Bacteriovoracaceae; g__; s__	2e-24
1104738	106.155	4.09345	0.00164113	NA	NA	NA		k__Bacteria; p__Proteobacteria; c__Deltaproteobacteria; o__Bdellovibrionales; f__Bacteriovoracaceae; g__; s__	2e-34
239190	1.62565	-4.39557	0.0362492	NA	NA	NA		k__Bacteria; p__Proteobacteria; c__Deltaproteobacteria; o__Bdellovibrionales; f__Bacteriovoracaceae; g__; s__	7e-37
New.ReferenceOTU14338	67.5759	6.39764	2.57e-11	NA	NA	NA		k__Bacteria; p__Proteobacteria; c__Deltaproteobacteria; o__Bdellovibrionales; f__Bacteriovoracaceae; g__Bacteriovorax; s__	4e-26
New.ReferenceOTU31851	6.55994	6.28069	1.73e-06	NA	NA	NA		k__Bacteria; p__Proteobacteria; c__Deltaproteobacteria; o__Bdellovibrionales; f__Bacteriovoracaceae; g__Bacteriovorax; s__	3e-17
258326	9.72096	7.2313	1.21e-05	NA	NA	NA		k__Bacteria; p__Proteobacteria; c__Deltaproteobacteria; o__Bdellovibrionales; f__Bacteriovoracaceae; g__Bacteriovorax; s__	2e-34
New.ReferenceOTU29674	2.53172	6.44458	0.000129203	NA	NA	NA		k__Bacteria; p__Proteobacteria; c__Deltaproteobacteria; o__Bdellovibrionales; f__Bacteriovoracaceae; g__Bacteriovorax; s__	5e-19
3551891	26.0044	5.43638	0.000559896	NA	NA	NA		k__Bacteria; p__Proteobacteria; c__Deltaproteobacteria; o__Bdellovibrionales; f__Bacteriovoracaceae; g__Bacteriovorax; s__	6e-34
New.ReferenceOTU15458	1.87122	5.9015	0.00101371	NA	NA	NA		k__Bacteria; p__Proteobacteria; c__Deltaproteobacteria; o__Bdellovibrionales; f__Bacteriovoracaceae; g__Bacteriovorax; s__	1e-29
New.ReferenceOTU13921	4.82836	4.22495	0.0320695	NA	NA	NA		k__Bacteria; p__Proteobacteria; c__Deltaproteobacteria; o__Bdellovibrionales; f__Bacteriovoracaceae; g__Bacteriovorax; s__	4e-25
New.ReferenceOTU19380	1.28599	4.47079	0.0365357	NA	NA	NA		k__Bacteria; p__Proteobacteria; c__Deltaproteobacteria; o__Bdellovibrionales; f__Bacteriovoracaceae; g__Bacteriovorax; s__	2e-27
New.ReferenceOTU22464	0.893542	4.30032	0.0478898	NA	NA	NA		k__Bacteria; p__Proteobacteria; c__Deltaproteobacteria; o__Bdellovibrionales; f__Bdellovibrionaceae; g__Bdellovibrio; s__	3e-17
New.ReferenceOTU9681	NA	NA	NA	NA	NA	NA		k__Bacteria; p__Proteobacteria; c__Deltaproteobacteria; o__Bdellovibrionales; f__Bdellovibrionaceae; g__Bdellovibrio; s__	2e-24
New.ReferenceOTU30619	0.67289	3.23695	0.0450395	NA	NA	NA		k__Bacteria; p__Proteobacteria; c__Deltaproteobacteria; o__Desulfovibrionales; f__Desulfomicrobiaceae; g__Desulfomicrobium; s__	1e-10
New.ReferenceOTU26663	23.2221	5.44137	0.000329485	NA	NA	NA		k__Bacteria; p__Proteobacteria; c__Deltaproteobacteria; o__Myxococcales; f__; g__; s__	8e-15
638942	49.6731	-2.72236	0.00881167	NA	NA	NA		k__Bacteria; p__Proteobacteria; c__Deltaproteobacteria; o__Myxococcales; f__; g__; s__	1e-35
544033	NA	NA	NA	NA	NA	NA		k__Bacteria; p__Proteobacteria; c__Deltaproteobacteria; o__Myxococcales; f__; g__; s__	4e-38
New.ReferenceOTU37185	NA	NA	NA	6.01618	-3.9657	0.0434416		k__Bacteria; p__Proteobacteria; c__Deltaproteobacteria; o__Myxococcales; f__Nannocystaceae; g__Nannocystis; s__	5e-22
New.ReferenceOTU10072	0.616527	4.72397	0.0195702	NA	NA	NA		k__Bacteria; p__Proteobacteria; c__Deltaproteobacteria; o__Myxococcales; f__Nannocystaceae; g__Plesiocystis; s__	4e-29
New.ReferenceOTU10963	NA	NA	NA	11.9596	4.95695	0.0113062		k__Bacteria; p__Proteobacteria; c__Deltaproteobacteria; o__Myxococcales; f__OM27; g__; s__	8e-09
New.ReferenceOTU35207	NA	NA	NA	3.55672	4.59154	0.0188499		k__Bacteria; p__Proteobacteria; c__Deltaproteobacteria; o__Myxococcales; f__OM27; g__; s__	1e-29
New.ReferenceOTU7157	27.17	5.54206	1.31e-05	NA	NA	NA		k__Bacteria; p__Proteobacteria; c__Deltaproteobacteria; o__Myxococcales; f__OM27; g__; s__	8e-09
New.ReferenceOTU27122	21.5603	5.76185	0.000424592	NA	NA	NA		k__Bacteria; p__Proteobacteria; c__Deltaproteobacteria; o__Myxococcales; f__OM27; g__; s__	1e-29
355193	1.89282	5.50363	0.00377646	NA	NA	NA		k__Bacteria; p__Proteobacteria; c__Deltaproteobacteria; o__Myxococcales; f__OM27; g__; s__	3e-39
New.ReferenceOTU23594	1.22284	4.88829	0.0155711	NA	NA	NA		k__Bacteria; p__Proteobacteria; c__Deltaproteobacteria; o__NB1-j; f__JTB38; g__; s__	1e-25
234196	3.03634	-3.95376	0.03871	NA	NA	NA		k__Bacteria; p__Proteobacteria; c__Deltaproteobacteria; o__PB19; f__; g__; s__	7e-37
New.ReferenceOTU19796	NA	NA	NA	10.4617	4.97445	0.00647349		k__Bacteria; p__Proteobacteria; c__Deltaproteobacteria; o__Spirobacillales; f__; g__; s__	4e-26
New.ReferenceOTU31246	NA	NA	NA	4.64604	4.96395	0.0090437		k__Bacteria; p__Proteobacteria; c__Deltaproteobacteria; o__Spirobacillales; f__; g__; s__	1e-25
New.ReferenceOTU4012	NA	NA	NA	2.4596	4.48716	0.0211372		k__Bacteria; p__Proteobacteria; c__Deltaproteobacteria; o__Spirobacillales; f__; g__; s__	1e-22
New.ReferenceOTU13566	NA	NA	NA	227.123	3.30185	0.0343856		k__Bacteria; p__Proteobacteria; c__Deltaproteobacteria; o__Spirobacillales; f__; g__; s__	2e-33
New.ReferenceOTU25099	NA	NA	NA	3.72315	3.95913	0.0364549		k__Bacteria; p__Proteobacteria; c__Deltaproteobacteria; o__Spirobacillales; f__; g__; s__	4e-29
2972848	NA	NA	NA	8.17817	3.69031	0.0457514		k__Bacteria; p__Proteobacteria; c__Deltaproteobacteria; o__Spirobacillales; f__; g__; s__	2e-31
552862	2928	-4.60757	1.2e-08	NA	NA	NA		k__Bacteria; p__Proteobacteria; c__Deltaproteobacteria; o__Sva0853; f__; g__; s__	2e-33
New.ReferenceOTU27799	1.09853	-6.03003	0.00201399	NA	NA	NA		k__Bacteria; p__Proteobacteria; c__Deltaproteobacteria; o__Sva0853; f__; g__; s__	7e-24
New.ReferenceOTU32685	1.01942	-5.41753	0.00293409	NA	NA	NA		k__Bacteria; p__Proteobacteria; c__Deltaproteobacteria; o__Sva0853; f__; g__; s__	4e-22
New.ReferenceOTU36005	1.70432	-5.01214	0.00304661	NA	NA	NA		k__Bacteria; p__Proteobacteria; c__Deltaproteobacteria; o__Sva0853; f__; g__; s__	4e-22
New.ReferenceOTU6313	1.34711	5.42364	0.00411117	NA	NA	NA		k__Bacteria; p__Proteobacteria; c__Deltaproteobacteria; o__Sva0853; f__; g__; s__	9e-12
New.ReferenceOTU28924	2.20536	-4.65209	0.00497732	NA	NA	NA		k__Bacteria; p__Proteobacteria; c__Deltaproteobacteria; o__Sva0853; f__; g__; s__	3e-23
837775	5.72141	-2.87786	0.00555401	NA	NA	NA		k__Bacteria; p__Proteobacteria; c__Deltaproteobacteria; o__Sva0853; f__; g__; s__	2e-33
New.ReferenceOTU29041	0.626569	-5.24326	0.00680776	NA	NA	NA		k__Bacteria; p__Proteobacteria; c__Deltaproteobacteria; o__Sva0853; f__; g__; s__	4e-22
New.ReferenceOTU36774	1.83803	-4.64727	0.00698485	NA	NA	NA		k__Bacteria; p__Proteobacteria; c__Deltaproteobacteria; o__Sva0853; f__; g__; s__	4e-22
New.ReferenceOTU7880	1.04634	-5.22324	0.0109371	NA	NA	NA		k__Bacteria; p__Proteobacteria; c__Deltaproteobacteria; o__Sva0853; f__; g__; s__	4e-22
New.ReferenceOTU5575	0.761043	-4.35503	0.0137188	NA	NA	NA		k__Bacteria; p__Proteobacteria; c__Deltaproteobacteria; o__Sva0853; f__; g__; s__	4e-22
New.ReferenceOTU4555	0.972895	-4.56533	0.0152276	NA	NA	NA		k__Bacteria; p__Proteobacteria; c__Deltaproteobacteria; o__Sva0853; f__; g__; s__	1e-22
New.ReferenceOTU7787	1.27304	-4.26248	0.020264	NA	NA	NA		k__Bacteria; p__Proteobacteria; c__Deltaproteobacteria; o__Sva0853; f__; g__; s__	4e-22
New.ReferenceOTU1633	0.63725	-4.80249	0.0221559	NA	NA	NA		k__Bacteria; p__Proteobacteria; c__Deltaproteobacteria; o__Sva0853; f__; g__; s__	4e-29
New.ReferenceOTU19415	0.428091	-4.89832	0.0241322	NA	NA	NA		k__Bacteria; p__Proteobacteria; c__Deltaproteobacteria; o__Sva0853; f__; g__; s__	4e-22
New.ReferenceOTU20375	0.913809	-4.108	0.0243075	NA	NA	NA		k__Bacteria; p__Proteobacteria; c__Deltaproteobacteria; o__Sva0853; f__; g__; s__	4e-22
New.ReferenceOTU34979	0.422181	-4.87204	0.0251716	NA	NA	NA		k__Bacteria; p__Proteobacteria; c__Deltaproteobacteria; o__Sva0853; f__; g__; s__	1e-28
New.ReferenceOTU13946	0.372826	-4.81997	0.0270651	NA	NA	NA		k__Bacteria; p__Proteobacteria; c__Deltaproteobacteria; o__Sva0853; f__; g__; s__	7e-24
New.ReferenceOTU17625	0.512055	-4.61973	0.0287199	NA	NA	NA		k__Bacteria; p__Proteobacteria; c__Deltaproteobacteria; o__Sva0853; f__; g__; s__	4e-22
New.ReferenceOTU36461	0.359113	-4.76844	0.0297108	NA	NA	NA		k__Bacteria; p__Proteobacteria; c__Deltaproteobacteria; o__Sva0853; f__; g__; s__	4e-22
New.ReferenceOTU22071	0.857068	-4.13794	0.0315226	NA	NA	NA		k__Bacteria; p__Proteobacteria; c__Deltaproteobacteria; o__Sva0853; f__; g__; s__	4e-22
New.ReferenceOTU3843	1.00808	-4.14595	0.0332096	NA	NA	NA		k__Bacteria; p__Proteobacteria; c__Deltaproteobacteria; o__Sva0853; f__; g__; s__	1e-22
New.ReferenceOTU2618	0.546433	-4.49804	0.0344224	NA	NA	NA		k__Bacteria; p__Proteobacteria; c__Deltaproteobacteria; o__Sva0853; f__; g__; s__	4e-22
New.ReferenceOTU32166	0.868901	-4.01544	0.0397073	NA	NA	NA		k__Bacteria; p__Proteobacteria; c__Deltaproteobacteria; o__Sva0853; f__; g__; s__	1e-28
New.ReferenceOTU1588	0.472007	-4.36703	0.0411079	NA	NA	NA		k__Bacteria; p__Proteobacteria; c__Deltaproteobacteria; o__Sva0853; f__; g__; s__	1e-22
New.ReferenceOTU8006	1.46979	-3.88306	0.0429735	NA	NA	NA		k__Bacteria; p__Proteobacteria; c__Deltaproteobacteria; o__Sva0853; f__; g__; s__	4e-22
New.ReferenceOTU16173	0.789005	-4.34295	0.044073	NA	NA	NA		k__Bacteria; p__Proteobacteria; c__Deltaproteobacteria; o__Sva0853; f__; g__; s__	4e-22
New.ReferenceOTU30920	0.636866	-4.00431	0.0465401	NA	NA	NA		k__Bacteria; p__Proteobacteria; c__Deltaproteobacteria; o__Sva0853; f__; g__; s__	4e-22
573599	3119.14	-2.34918	0.00107853	NA	NA	NA		k__Bacteria; p__Proteobacteria; c__Epsilonproteobacteria; o__Campylobacterales; f__; g__; s__	7e-37
New.ReferenceOTU7175	3.12915	-2.78366	0.00135588	NA	NA	NA		k__Bacteria; p__Proteobacteria; c__Epsilonproteobacteria; o__Campylobacterales; f__; g__; s__	3e-33
New.ReferenceOTU20889	0.730992	-3.26877	0.00293628	NA	NA	NA		k__Bacteria; p__Proteobacteria; c__Epsilonproteobacteria; o__Campylobacterales; f__; g__; s__	2e-31
New.ReferenceOTU33058	0.247001	-5.5702	0.00294303	NA	NA	NA		k__Bacteria; p__Proteobacteria; c__Epsilonproteobacteria; o__Campylobacterales; f__; g__; s__	4e-32
New.ReferenceOTU1245	0.313909	-4.19197	0.0058917	NA	NA	NA		k__Bacteria; p__Proteobacteria; c__Epsilonproteobacteria; o__Campylobacterales; f__; g__; s__	6e-31
New.ReferenceOTU25390	0.537699	-3.38134	0.0276048	NA	NA	NA		k__Bacteria; p__Proteobacteria; c__Epsilonproteobacteria; o__Campylobacterales; f__; g__; s__	2e-28
New.ReferenceOTU34419	0.175482	-3.35427	0.0314638	NA	NA	NA		k__Bacteria; p__Proteobacteria; c__Epsilonproteobacteria; o__Campylobacterales; f__; g__; s__	9e-27
New.ReferenceOTU29443	0.717719	3.23691	0.0350084	NA	NA	NA		k__Bacteria; p__Proteobacteria; c__Epsilonproteobacteria; o__Campylobacterales; f__; g__; s__	1e-35
New.ReferenceOTU30810	1.62503	-3.16646	0.0401409	NA	NA	NA		k__Bacteria; p__Proteobacteria; c__Epsilonproteobacteria; o__Campylobacterales; f__; g__; s__	4e-26
New.ReferenceOTU1366	2.0459	4.34534	0.0465401	NA	NA	NA		k__Bacteria; p__Proteobacteria; c__Epsilonproteobacteria; o__Campylobacterales; f__; g__; s__	4e-26
New.ReferenceOTU10566	NA	NA	NA	6.4378	4.78936	0.0140601		k__Bacteria; p__Proteobacteria; c__Epsilonproteobacteria; o__Campylobacterales; f__Campylobacteraceae; g__Arcobacter; s__	6e-31
New.ReferenceOTU19523	1428.78	6.11462	2.51e-15	NA	NA	NA		k__Bacteria; p__Proteobacteria; c__Epsilonproteobacteria; o__Campylobacterales; f__Campylobacteraceae; g__Arcobacter; s__	3e-17
New.ReferenceOTU2026	82.754	7.43604	5.26e-12	NA	NA	NA		k__Bacteria; p__Proteobacteria; c__Epsilonproteobacteria; o__Campylobacterales; f__Campylobacteraceae; g__Arcobacter; s__	1e-13
245113	8.36156	7.67995	6.87e-07	NA	NA	NA		k__Bacteria; p__Proteobacteria; c__Epsilonproteobacteria; o__Campylobacterales; f__Campylobacteraceae; g__Arcobacter; s__	3e-33
New.ReferenceOTU1731	9.71292	6.78289	8.54e-05	NA	NA	NA		k__Bacteria; p__Proteobacteria; c__Epsilonproteobacteria; o__Campylobacterales; f__Campylobacteraceae; g__Arcobacter; s__	2e-28
New.ReferenceOTU9086	2.21951	6.08303	0.000465349	NA	NA	NA		k__Bacteria; p__Proteobacteria; c__Epsilonproteobacteria; o__Campylobacterales; f__Campylobacteraceae; g__Arcobacter; s__	1e-16
New.ReferenceOTU9189	5.21969	6.1542	0.000718563	NA	NA	NA		k__Bacteria; p__Proteobacteria; c__Epsilonproteobacteria; o__Campylobacterales; f__Campylobacteraceae; g__Arcobacter; s__	1e-25
New.ReferenceOTU24730	8.64468	5.50194	0.000830117	NA	NA	NA		k__Bacteria; p__Proteobacteria; c__Epsilonproteobacteria; o__Campylobacterales; f__Campylobacteraceae; g__Arcobacter; s__	4e-29
New.ReferenceOTU18002	5.59682	5.97061	0.0013399	NA	NA	NA		k__Bacteria; p__Proteobacteria; c__Epsilonproteobacteria; o__Campylobacterales; f__Campylobacteraceae; g__Arcobacter; s__	2e-28
755686	19.1025	5.17519	0.00212793	NA	NA	NA		k__Bacteria; p__Proteobacteria; c__Epsilonproteobacteria; o__Campylobacterales; f__Campylobacteraceae; g__Arcobacter; s__	1e-35
New.ReferenceOTU18436	6.67651	4.3122	0.00440909	NA	NA	NA		k__Bacteria; p__Proteobacteria; c__Epsilonproteobacteria; o__Campylobacterales; f__Campylobacteraceae; g__Arcobacter; s__	2e-15
New.ReferenceOTU4611	5.32518	5.14466	0.0051215	NA	NA	NA		k__Bacteria; p__Proteobacteria; c__Epsilonproteobacteria; o__Campylobacterales; f__Campylobacteraceae; g__Arcobacter; s__	2e-28
New.ReferenceOTU4372	8.35003	4.98297	0.00766956	NA	NA	NA		k__Bacteria; p__Proteobacteria; c__Epsilonproteobacteria; o__Campylobacterales; f__Campylobacteraceae; g__Arcobacter; s__	1e-16
New.ReferenceOTU16566	3.0976	5.29867	0.00772648	NA	NA	NA		k__Bacteria; p__Proteobacteria; c__Epsilonproteobacteria; o__Campylobacterales; f__Campylobacteraceae; g__Arcobacter; s__	4e-29
New.ReferenceOTU8271	2.60418	5.20016	0.00909412	NA	NA	NA		k__Bacteria; p__Proteobacteria; c__Epsilonproteobacteria; o__Campylobacterales; f__Campylobacteraceae; g__Arcobacter; s__	4e-26
New.ReferenceOTU1768	5.41879	5.17038	0.0111581	NA	NA	NA		k__Bacteria; p__Proteobacteria; c__Epsilonproteobacteria; o__Campylobacterales; f__Campylobacteraceae; g__Arcobacter; s__	2e-28
New.ReferenceOTU16916	3.77943	5.09049	0.012784	NA	NA	NA		k__Bacteria; p__Proteobacteria; c__Epsilonproteobacteria; o__Campylobacterales; f__Campylobacteraceae; g__Arcobacter; s__	2e-28
New.ReferenceOTU27330	3.839	5.08461	0.0131939	NA	NA	NA		k__Bacteria; p__Proteobacteria; c__Epsilonproteobacteria; o__Campylobacterales; f__Campylobacteraceae; g__Arcobacter; s__	2e-28
New.ReferenceOTU23898	7.24498	4.90795	0.0132287	NA	NA	NA		k__Bacteria; p__Proteobacteria; c__Epsilonproteobacteria; o__Campylobacterales; f__Campylobacteraceae; g__Arcobacter; s__	2e-28
New.ReferenceOTU29609	3.84704	5.07664	0.0133421	NA	NA	NA		k__Bacteria; p__Proteobacteria; c__Epsilonproteobacteria; o__Campylobacterales; f__Campylobacteraceae; g__Arcobacter; s__	2e-28
New.ReferenceOTU1315	3.50057	5.05734	0.0137188	NA	NA	NA		k__Bacteria; p__Proteobacteria; c__Epsilonproteobacteria; o__Campylobacterales; f__Campylobacteraceae; g__Arcobacter; s__	2e-28
New.ReferenceOTU5784	4.99087	4.77074	0.0157509	NA	NA	NA		k__Bacteria; p__Proteobacteria; c__Epsilonproteobacteria; o__Campylobacterales; f__Campylobacteraceae; g__Arcobacter; s__	2e-28
New.ReferenceOTU15267	2.90454	3.2095	0.0188493	NA	NA	NA		k__Bacteria; p__Proteobacteria; c__Epsilonproteobacteria; o__Campylobacterales; f__Campylobacteraceae; g__Arcobacter; s__	2e-15
New.ReferenceOTU9937	1.01676	4.7516	0.0208523	NA	NA	NA		k__Bacteria; p__Proteobacteria; c__Epsilonproteobacteria; o__Campylobacterales; f__Campylobacteraceae; g__Arcobacter; s__	1e-19
New.ReferenceOTU2745	7.89535	4.81836	0.0238283	NA	NA	NA		k__Bacteria; p__Proteobacteria; c__Epsilonproteobacteria; o__Campylobacterales; f__Campylobacteraceae; g__Arcobacter; s__	2e-28
New.ReferenceOTU27511	0.635167	4.59588	0.0238434	NA	NA	NA		k__Bacteria; p__Proteobacteria; c__Epsilonproteobacteria; o__Campylobacterales; f__Campylobacteraceae; g__Arcobacter; s__	1e-16
New.ReferenceOTU31951	0.748302	4.55859	0.0262596	NA	NA	NA		k__Bacteria; p__Proteobacteria; c__Epsilonproteobacteria; o__Campylobacterales; f__Campylobacteraceae; g__Arcobacter; s__	5e-13
New.ReferenceOTU32371	1.10719	4.59337	0.0287945	NA	NA	NA		k__Bacteria; p__Proteobacteria; c__Epsilonproteobacteria; o__Campylobacterales; f__Campylobacteraceae; g__Arcobacter; s__	6e-28
New.ReferenceOTU22699	0.580251	4.48622	0.0290393	NA	NA	NA		k__Bacteria; p__Proteobacteria; c__Epsilonproteobacteria; o__Campylobacterales; f__Campylobacteraceae; g__Arcobacter; s__	2e-12
New.ReferenceOTU5457	2.73043	4.64572	0.0300104	NA	NA	NA		k__Bacteria; p__Proteobacteria; c__Epsilonproteobacteria; o__Campylobacterales; f__Campylobacteraceae; g__Arcobacter; s__	2e-28
New.ReferenceOTU3601	0.571291	4.45564	0.0303539	NA	NA	NA		k__Bacteria; p__Proteobacteria; c__Epsilonproteobacteria; o__Campylobacterales; f__Campylobacteraceae; g__Arcobacter; s__	2e-09
New.ReferenceOTU17159	1.70988	4.58099	0.0324904	NA	NA	NA		k__Bacteria; p__Proteobacteria; c__Epsilonproteobacteria; o__Campylobacterales; f__Campylobacteraceae; g__Arcobacter; s__	6e-31
New.ReferenceOTU8048	6.7877	3.90013	0.0337172	NA	NA	NA		k__Bacteria; p__Proteobacteria; c__Epsilonproteobacteria; o__Campylobacterales; f__Campylobacteraceae; g__Arcobacter; s__	2e-28
New.ReferenceOTU25038	1.08038	4.47783	0.0343295	NA	NA	NA		k__Bacteria; p__Proteobacteria; c__Epsilonproteobacteria; o__Campylobacterales; f__Campylobacteraceae; g__Arcobacter; s__	6e-31
New.ReferenceOTU34230	0.466288	4.33486	0.0369205	NA	NA	NA		k__Bacteria; p__Proteobacteria; c__Epsilonproteobacteria; o__Campylobacterales; f__Campylobacteraceae; g__Arcobacter; s__	1e-10
New.ReferenceOTU14251	1.44264	4.43822	0.0401409	NA	NA	NA		k__Bacteria; p__Proteobacteria; c__Epsilonproteobacteria; o__Campylobacterales; f__Campylobacteraceae; g__Arcobacter; s__	2e-28
New.ReferenceOTU3680	2.10988	4.12054	0.0453557	NA	NA	NA		k__Bacteria; p__Proteobacteria; c__Epsilonproteobacteria; o__Campylobacterales; f__Campylobacteraceae; g__Arcobacter; s__	1e-26
New.ReferenceOTU29543	0.727526	4.22421	0.0471291	NA	NA	NA		k__Bacteria; p__Proteobacteria; c__Epsilonproteobacteria; o__Campylobacterales; f__Campylobacteraceae; g__Arcobacter; s__	6e-19
New.ReferenceOTU6622	NA	NA	NA	NA	NA	NA		k__Bacteria; p__Proteobacteria; c__Epsilonproteobacteria; o__Campylobacterales; f__Campylobacteraceae; g__Arcobacter; s__	2e-15
New.ReferenceOTU35946	15.3309	4.5968	0.000159704	NA	NA	NA		k__Bacteria; p__Proteobacteria; c__Epsilonproteobacteria; o__Campylobacterales; f__Campylobacteraceae; g__Arcobacter; s__cryaerophilus	6e-31
New.ReferenceOTU9049	6.97473	5.57308	0.000557726	NA	NA	NA		k__Bacteria; p__Proteobacteria; c__Epsilonproteobacteria; o__Campylobacterales; f__Campylobacteraceae; g__Arcobacter; s__cryaerophilus	1e-35
New.ReferenceOTU456	2.38892	5.14078	0.00200509	NA	NA	NA		k__Bacteria; p__Proteobacteria; c__Epsilonproteobacteria; o__Campylobacterales; f__Campylobacteraceae; g__Arcobacter; s__cryaerophilus	1e-32
New.ReferenceOTU6517	3.91007	5.1328	0.00382278	NA	NA	NA		k__Bacteria; p__Proteobacteria; c__Epsilonproteobacteria; o__Campylobacterales; f__Campylobacteraceae; g__Arcobacter; s__cryaerophilus	4e-35
New.ReferenceOTU6619	1.10273	5.18246	0.00682407	NA	NA	NA		k__Bacteria; p__Proteobacteria; c__Epsilonproteobacteria; o__Campylobacterales; f__Campylobacteraceae; g__Arcobacter; s__cryaerophilus	6e-31
New.ReferenceOTU16810	1.72387	5.22771	0.00702737	NA	NA	NA		k__Bacteria; p__Proteobacteria; c__Epsilonproteobacteria; o__Campylobacterales; f__Campylobacteraceae; g__Arcobacter; s__cryaerophilus	3e-30
New.ReferenceOTU23892	6.23422	4.16967	0.00797725	NA	NA	NA		k__Bacteria; p__Proteobacteria; c__Epsilonproteobacteria; o__Campylobacterales; f__Campylobacteraceae; g__Arcobacter; s__cryaerophilus	6e-28
New.ReferenceOTU34166	1.44422	5.12585	0.00861359	NA	NA	NA		k__Bacteria; p__Proteobacteria; c__Epsilonproteobacteria; o__Campylobacterales; f__Campylobacteraceae; g__Arcobacter; s__cryaerophilus	1e-32
New.ReferenceOTU18556	1.25855	5.10561	0.00899261	NA	NA	NA		k__Bacteria; p__Proteobacteria; c__Epsilonproteobacteria; o__Campylobacterales; f__Campylobacteraceae; g__Arcobacter; s__cryaerophilus	6e-31
New.ReferenceOTU12467	4.07286	4.29884	0.00975856	NA	NA	NA		k__Bacteria; p__Proteobacteria; c__Epsilonproteobacteria; o__Campylobacterales; f__Campylobacteraceae; g__Arcobacter; s__cryaerophilus	2e-28
New.ReferenceOTU24281	0.959337	4.88151	0.0154011	NA	NA	NA		k__Bacteria; p__Proteobacteria; c__Epsilonproteobacteria; o__Campylobacterales; f__Campylobacteraceae; g__Arcobacter; s__cryaerophilus	3e-30
New.ReferenceOTU29835	0.926072	4.82662	0.0157509	NA	NA	NA		k__Bacteria; p__Proteobacteria; c__Epsilonproteobacteria; o__Campylobacterales; f__Campylobacteraceae; g__Arcobacter; s__cryaerophilus	3e-23
New.ReferenceOTU7231	0.691676	4.64308	0.022073	NA	NA	NA		k__Bacteria; p__Proteobacteria; c__Epsilonproteobacteria; o__Campylobacterales; f__Campylobacteraceae; g__Arcobacter; s__cryaerophilus	2e-28
New.ReferenceOTU19090	0.78529	4.56666	0.0277204	NA	NA	NA		k__Bacteria; p__Proteobacteria; c__Epsilonproteobacteria; o__Campylobacterales; f__Campylobacteraceae; g__Arcobacter; s__cryaerophilus	3e-23
New.ReferenceOTU9572	0.607409	4.5028	0.0295507	NA	NA	NA		k__Bacteria; p__Proteobacteria; c__Epsilonproteobacteria; o__Campylobacterales; f__Campylobacteraceae; g__Arcobacter; s__cryaerophilus	4e-22
New.ReferenceOTU10042	2.50317	4.61919	0.0306093	NA	NA	NA		k__Bacteria; p__Proteobacteria; c__Epsilonproteobacteria; o__Campylobacterales; f__Campylobacteraceae; g__Arcobacter; s__cryaerophilus	2e-25
New.ReferenceOTU7399	0.6607	4.40524	0.0343974	NA	NA	NA		k__Bacteria; p__Proteobacteria; c__Epsilonproteobacteria; o__Campylobacterales; f__Campylobacteraceae; g__Arcobacter; s__cryaerophilus	6e-28
New.ReferenceOTU32929	0.754105	3.87543	0.0346074	NA	NA	NA		k__Bacteria; p__Proteobacteria; c__Epsilonproteobacteria; o__Campylobacterales; f__Campylobacteraceae; g__Arcobacter; s__cryaerophilus	6e-31
New.ReferenceOTU9940	0.744203	4.42828	0.0347139	NA	NA	NA		k__Bacteria; p__Proteobacteria; c__Epsilonproteobacteria; o__Campylobacterales; f__Campylobacteraceae; g__Arcobacter; s__cryaerophilus	2e-28
New.ReferenceOTU312	1.02091	4.03804	0.0366862	NA	NA	NA		k__Bacteria; p__Proteobacteria; c__Epsilonproteobacteria; o__Campylobacterales; f__Campylobacteraceae; g__Arcobacter; s__cryaerophilus	3e-23
New.ReferenceOTU7262	43.9811	5.28709	0.00245628	NA	NA	NA		k__Bacteria; p__Proteobacteria; c__Epsilonproteobacteria; o__Campylobacterales; f__Helicobacteraceae; g__Sulfurimonas; s__	3e-20
New.ReferenceOTU10063	NA	NA	NA	44.6113	7.32843	4.04e-07		k__Bacteria; p__Proteobacteria; c__Gammaproteobacteria; o__; f__; g__; s__	7e-12
812095	NA	NA	NA	683.634	6.32553	9.05e-06		k__Bacteria; p__Proteobacteria; c__Gammaproteobacteria; o__; f__; g__; s__	1e-35
4388994	NA	NA	NA	51.379	4.71593	9.23e-05		k__Bacteria; p__Proteobacteria; c__Gammaproteobacteria; o__; f__; g__; s__	1e-35
73001	2.49391	4.75017	6.37e-05	NA	NA	NA		k__Bacteria; p__Proteobacteria; c__Gammaproteobacteria; o__; f__; g__; s__	2e-33
4474787	2.08126	5.44825	0.000419814	NA	NA	NA		k__Bacteria; p__Proteobacteria; c__Gammaproteobacteria; o__; f__; g__; s__	1e-35
262025	0.463812	4.54977	0.0253324	NA	NA	NA		k__Bacteria; p__Proteobacteria; c__Gammaproteobacteria; o__; f__; g__; s__	2e-33
New.ReferenceOTU34738	3.93182	4.35823	0.0314055	NA	NA	NA		k__Bacteria; p__Proteobacteria; c__Gammaproteobacteria; o__; f__; g__; s__	4e-29
585507	0.499943	4.42324	0.0345326	NA	NA	NA		k__Bacteria; p__Proteobacteria; c__Gammaproteobacteria; o__; f__; g__; s__	1e-35
New.ReferenceOTU13745	21.5298	7.78077	2.29e-10	NA	NA	NA		k__Bacteria; p__Proteobacteria; c__Gammaproteobacteria; o__[Marinicellales]; f__[Marinicellaceae]; g__; s__	2e-24
4413448	1.99431	4.47364	0.00712925	NA	NA	NA		k__Bacteria; p__Proteobacteria; c__Gammaproteobacteria; o__[Marinicellales]; f__[Marinicellaceae]; g__; s__	3e-29
New.ReferenceOTU23114	0.951926	3.85986	0.0173248	NA	NA	NA		k__Bacteria; p__Proteobacteria; c__Gammaproteobacteria; o__[Marinicellales]; f__[Marinicellaceae]; g__; s__	4e-19
1129464	3.13655	3.29103	0.0392422	NA	NA	NA		k__Bacteria; p__Proteobacteria; c__Gammaproteobacteria; o__[Marinicellales]; f__[Marinicellaceae]; g__Marinicella; s__	4e-35
New.ReferenceOTU29798	NA	NA	NA	3.22729	4.39454	0.027643		k__Bacteria; p__Proteobacteria; c__Gammaproteobacteria; o__Alteromonadales; f__; g__; s__	1e-28
2427666	33.9696	5.8778	3e-07	NA	NA	NA		k__Bacteria; p__Proteobacteria; c__Gammaproteobacteria; o__Alteromonadales; f__; g__; s__	1e-35
3253723	18.7889	5.90838	1.47e-05	NA	NA	NA		k__Bacteria; p__Proteobacteria; c__Gammaproteobacteria; o__Alteromonadales; f__; g__; s__	1e-35
351395	29.2707	3.67005	1.61e-05	NA	NA	NA		k__Bacteria; p__Proteobacteria; c__Gammaproteobacteria; o__Alteromonadales; f__; g__; s__	1e-35
1070749	10.3822	5.92865	7.89e-05	NA	NA	NA		k__Bacteria; p__Proteobacteria; c__Gammaproteobacteria; o__Alteromonadales; f__; g__; s__	2e-34
189314	17.8596	5.15923	0.00049671	NA	NA	NA		k__Bacteria; p__Proteobacteria; c__Gammaproteobacteria; o__Alteromonadales; f__; g__; s__	1e-35
New.ReferenceOTU17972	1.31651	5.75551	0.00132048	NA	NA	NA		k__Bacteria; p__Proteobacteria; c__Gammaproteobacteria; o__Alteromonadales; f__; g__; s__	4e-26
New.ReferenceOTU34532	1.4786	5.77308	0.00132169	NA	NA	NA		k__Bacteria; p__Proteobacteria; c__Gammaproteobacteria; o__Alteromonadales; f__; g__; s__	4e-26
New.ReferenceOTU12859	1.06165	5.4504	0.00326912	NA	NA	NA		k__Bacteria; p__Proteobacteria; c__Gammaproteobacteria; o__Alteromonadales; f__; g__; s__	4e-26
1111895	1.058	4.25599	0.00642146	NA	NA	NA		k__Bacteria; p__Proteobacteria; c__Gammaproteobacteria; o__Alteromonadales; f__; g__; s__	1e-35
New.ReferenceOTU28015	1.24482	4.59553	0.0104753	NA	NA	NA		k__Bacteria; p__Proteobacteria; c__Gammaproteobacteria; o__Alteromonadales; f__; g__; s__	4e-26
New.ReferenceOTU35674	1.32562	3.8397	0.0112076	NA	NA	NA		k__Bacteria; p__Proteobacteria; c__Gammaproteobacteria; o__Alteromonadales; f__; g__; s__	4e-26
New.ReferenceOTU29611	0.850817	4.97327	0.011703	NA	NA	NA		k__Bacteria; p__Proteobacteria; c__Gammaproteobacteria; o__Alteromonadales; f__; g__; s__	2e-27
New.ReferenceOTU30723	0.841215	4.9607	0.0120156	NA	NA	NA		k__Bacteria; p__Proteobacteria; c__Gammaproteobacteria; o__Alteromonadales; f__; g__; s__	4e-26
4331426	1.01847	4.29861	0.0142669	NA	NA	NA		k__Bacteria; p__Proteobacteria; c__Gammaproteobacteria; o__Alteromonadales; f__; g__; s__	2e-33
New.ReferenceOTU20704	0.609298	4.81587	0.0154306	NA	NA	NA		k__Bacteria; p__Proteobacteria; c__Gammaproteobacteria; o__Alteromonadales; f__; g__; s__	1e-22
New.ReferenceOTU2539	0.522811	4.63531	0.0223309	NA	NA	NA		k__Bacteria; p__Proteobacteria; c__Gammaproteobacteria; o__Alteromonadales; f__; g__; s__	4e-26
New.ReferenceOTU68	0.404081	4.23414	0.046713	NA	NA	NA		k__Bacteria; p__Proteobacteria; c__Gammaproteobacteria; o__Alteromonadales; f__; g__; s__	9e-27
New.ReferenceOTU18402	0.871186	4.28991	0.0473148	NA	NA	NA		k__Bacteria; p__Proteobacteria; c__Gammaproteobacteria; o__Alteromonadales; f__; g__; s__	4e-25
New.ReferenceOTU12806	0.961058	3.36887	0.0478898	NA	NA	NA		k__Bacteria; p__Proteobacteria; c__Gammaproteobacteria; o__Alteromonadales; f__; g__; s__	4e-26
569335	1.04649	-5.48012	0.0374849	NA	NA	NA		k__Bacteria; p__Proteobacteria; c__Gammaproteobacteria; o__Alteromonadales; f__[Chromatiaceae]; g__Rheinheimera; s__	1e-35
New.ReferenceOTU9736	3.42851	3.92224	0.00180049	NA	NA	NA		k__Bacteria; p__Proteobacteria; c__Gammaproteobacteria; o__Alteromonadales; f__125ds10; g__; s__	2e-15
821679	4.70182	3.00878	0.0347607	NA	NA	NA		k__Bacteria; p__Proteobacteria; c__Gammaproteobacteria; o__Alteromonadales; f__125ds10; g__; s__	2e-34
New.ReferenceOTU35213	14.1261	6.05839	3.26e-09	NA	NA	NA		k__Bacteria; p__Proteobacteria; c__Gammaproteobacteria; o__Alteromonadales; f__211ds20; g__; s__	4e-29
New.ReferenceOTU5183	1.11403	5.10136	0.00796224	NA	NA	NA		k__Bacteria; p__Proteobacteria; c__Gammaproteobacteria; o__Alteromonadales; f__211ds20; g__; s__	4e-29
New.ReferenceOTU9726	1.0002	4.87804	0.0138562	NA	NA	NA		k__Bacteria; p__Proteobacteria; c__Gammaproteobacteria; o__Alteromonadales; f__211ds20; g__; s__	3e-20
931708	1.18825	4.38499	0.0417175	NA	NA	NA		k__Bacteria; p__Proteobacteria; c__Gammaproteobacteria; o__Alteromonadales; f__211ds20; g__; s__	1e-35
New.ReferenceOTU13800	NA	NA	NA	10.2779	5.63099	0.000238838		k__Bacteria; p__Proteobacteria; c__Gammaproteobacteria; o__Alteromonadales; f__Alteromonadaceae; g__; s__	2e-33
New.ReferenceOTU32382	NA	NA	NA	13.6031	5.15665	0.000385328		k__Bacteria; p__Proteobacteria; c__Gammaproteobacteria; o__Alteromonadales; f__Alteromonadaceae; g__; s__	1e-28
4481244	NA	NA	NA	12.4877	5.21685	0.00646264		k__Bacteria; p__Proteobacteria; c__Gammaproteobacteria; o__Alteromonadales; f__Alteromonadaceae; g__; s__	6e-31
New.ReferenceOTU30319	NA	NA	NA	2.1839	4.39853	0.0245011		k__Bacteria; p__Proteobacteria; c__Gammaproteobacteria; o__Alteromonadales; f__Alteromonadaceae; g__; s__	4e-26
New.ReferenceOTU18361	34.7649	5.64431	3.84e-09	NA	NA	NA		k__Bacteria; p__Proteobacteria; c__Gammaproteobacteria; o__Alteromonadales; f__Alteromonadaceae; g__; s__	1e-28
281684	126.746	5.01305	1.7e-05	NA	NA	NA		k__Bacteria; p__Proteobacteria; c__Gammaproteobacteria; o__Alteromonadales; f__Alteromonadaceae; g__; s__	2e-33
298992	13.4407	4.83328	0.000110716	NA	NA	NA		k__Bacteria; p__Proteobacteria; c__Gammaproteobacteria; o__Alteromonadales; f__Alteromonadaceae; g__; s__	1e-35
539544	2.52617	6.47781	0.000112308	NA	NA	NA		k__Bacteria; p__Proteobacteria; c__Gammaproteobacteria; o__Alteromonadales; f__Alteromonadaceae; g__; s__	6e-31
4196748	22.3986	4.13732	0.000427321	NA	NA	NA		k__Bacteria; p__Proteobacteria; c__Gammaproteobacteria; o__Alteromonadales; f__Alteromonadaceae; g__; s__	1e-35
837194	401.325	2.53084	0.000702845	NA	NA	NA		k__Bacteria; p__Proteobacteria; c__Gammaproteobacteria; o__Alteromonadales; f__Alteromonadaceae; g__; s__	1e-35
4453271	1.03301	5.30889	0.00487148	NA	NA	NA		k__Bacteria; p__Proteobacteria; c__Gammaproteobacteria; o__Alteromonadales; f__Alteromonadaceae; g__; s__	6e-31
New.ReferenceOTU20357	2.8257	3.93351	0.045435	NA	NA	NA		k__Bacteria; p__Proteobacteria; c__Gammaproteobacteria; o__Alteromonadales; f__Alteromonadaceae; g__; s__	8e-21
New.ReferenceOTU23931	NA	NA	NA	NA	NA	NA		k__Bacteria; p__Proteobacteria; c__Gammaproteobacteria; o__Alteromonadales; f__Alteromonadaceae; g__; s__	4e-26
4311707	NA	NA	NA	214.966	2.33824	0.0123759		k__Bacteria; p__Proteobacteria; c__Gammaproteobacteria; o__Alteromonadales; f__Alteromonadaceae; g__Alteromonas; s__	1e-35
New.ReferenceOTU26231	0.164038	-4.40993	0.0406612	NA	NA	NA		k__Bacteria; p__Proteobacteria; c__Gammaproteobacteria; o__Alteromonadales; f__Alteromonadaceae; g__Alteromonas; s__	2e-18
203101	NA	NA	NA	9.68009	6.10201	0.000391674		k__Bacteria; p__Proteobacteria; c__Gammaproteobacteria; o__Alteromonadales; f__Alteromonadaceae; g__BD2-13; s__	2e-33
New.ReferenceOTU29956	NA	NA	NA	3.47955	4.66675	0.0158809		k__Bacteria; p__Proteobacteria; c__Gammaproteobacteria; o__Alteromonadales; f__Alteromonadaceae; g__BD2-13; s__	1e-28
2618271	NA	NA	NA	10.3008	3.94775	0.0173433		k__Bacteria; p__Proteobacteria; c__Gammaproteobacteria; o__Alteromonadales; f__Alteromonadaceae; g__BD2-13; s__	4e-35
316869	176.973	4.64086	3.85e-10	NA	NA	NA		k__Bacteria; p__Proteobacteria; c__Gammaproteobacteria; o__Alteromonadales; f__Alteromonadaceae; g__BD2-13; s__	1e-35
New.ReferenceOTU14885	NA	NA	NA	10.5894	4.73178	0.0125672		k__Bacteria; p__Proteobacteria; c__Gammaproteobacteria; o__Alteromonadales; f__Alteromonadaceae; g__Glaciecola; s__	1e-28
New.ReferenceOTU36578	NA	NA	NA	6.27494	4.14931	0.0209521		k__Bacteria; p__Proteobacteria; c__Gammaproteobacteria; o__Alteromonadales; f__Alteromonadaceae; g__Glaciecola; s__	2e-33
213039	0.46646	-4.42417	0.00422121	NA	NA	NA		k__Bacteria; p__Proteobacteria; c__Gammaproteobacteria; o__Alteromonadales; f__Alteromonadaceae; g__Glaciecola; s__	4e-35
4443967	0.618345	4.62214	0.0241322	NA	NA	NA		k__Bacteria; p__Proteobacteria; c__Gammaproteobacteria; o__Alteromonadales; f__Alteromonadaceae; g__Glaciecola; s__	1e-35
4443138	2.29542	-2.38609	0.0343411	NA	NA	NA		k__Bacteria; p__Proteobacteria; c__Gammaproteobacteria; o__Alteromonadales; f__Alteromonadaceae; g__Glaciecola; s__	2e-33
New.ReferenceOTU27027	0.812399	4.23679	0.0498831	NA	NA	NA		k__Bacteria; p__Proteobacteria; c__Gammaproteobacteria; o__Alteromonadales; f__Alteromonadaceae; g__Glaciecola; s__	2e-12
4327205	NA	NA	NA	NA	NA	NA		k__Bacteria; p__Proteobacteria; c__Gammaproteobacteria; o__Alteromonadales; f__Alteromonadaceae; g__Glaciecola; s__	1e-35
New.ReferenceOTU27464	0.583579	4.80477	0.0157509	NA	NA	NA		k__Bacteria; p__Proteobacteria; c__Gammaproteobacteria; o__Alteromonadales; f__Alteromonadaceae; g__Marinobacter; s__	4e-25
New.ReferenceOTU37475	0.901464	4.69469	0.0222774	NA	NA	NA		k__Bacteria; p__Proteobacteria; c__Gammaproteobacteria; o__Alteromonadales; f__Alteromonadaceae; g__Marinobacter; s__	7e-12
834052	5.42539	2.25061	0.0249265	NA	NA	NA		k__Bacteria; p__Proteobacteria; c__Gammaproteobacteria; o__Alteromonadales; f__Alteromonadaceae; g__Marinobacter; s__	4e-35
4419806	NA	NA	NA	4.64645	4.05712	0.0495182		k__Bacteria; p__Proteobacteria; c__Gammaproteobacteria; o__Alteromonadales; f__Alteromonadaceae; g__Marinobacter; s__hydrocarbonoclasticus	1e-35
New.ReferenceOTU32819	NA	NA	NA	22.6379	5.23892	0.00513831		k__Bacteria; p__Proteobacteria; c__Gammaproteobacteria; o__Alteromonadales; f__Colwelliaceae; g__; s__	6e-12
New.ReferenceOTU216	NA	NA	NA	3.65236	4.67914	0.0157233		k__Bacteria; p__Proteobacteria; c__Gammaproteobacteria; o__Alteromonadales; f__Colwelliaceae; g__; s__	9e-30
817622	NA	NA	NA	10.1978	4.33268	0.028229		k__Bacteria; p__Proteobacteria; c__Gammaproteobacteria; o__Alteromonadales; f__Colwelliaceae; g__; s__	1e-35
163227	NA	NA	NA	5.45905	4.1723	0.0416919		k__Bacteria; p__Proteobacteria; c__Gammaproteobacteria; o__Alteromonadales; f__Colwelliaceae; g__; s__	1e-35
New.ReferenceOTU15316	1.52386	5.88656	0.000886722	NA	NA	NA		k__Bacteria; p__Proteobacteria; c__Gammaproteobacteria; o__Alteromonadales; f__Colwelliaceae; g__; s__	1e-28
822587	3.06543	4.19829	0.0129876	NA	NA	NA		k__Bacteria; p__Proteobacteria; c__Gammaproteobacteria; o__Alteromonadales; f__Colwelliaceae; g__; s__	2e-33
816610	3.43558	2.15517	0.0177361	NA	NA	NA		k__Bacteria; p__Proteobacteria; c__Gammaproteobacteria; o__Alteromonadales; f__Colwelliaceae; g__; s__	1e-35
New.ReferenceOTU32161	1.40533	4.46716	0.0346074	NA	NA	NA		k__Bacteria; p__Proteobacteria; c__Gammaproteobacteria; o__Alteromonadales; f__Colwelliaceae; g__; s__	9e-24
New.ReferenceOTU21184	NA	NA	NA	6.81385	5.92681	0.000539516		k__Bacteria; p__Proteobacteria; c__Gammaproteobacteria; o__Alteromonadales; f__Colwelliaceae; g__Thalassomonas; s__	5e-22
810733	NA	NA	NA	7.35724	5.67248	0.00149885		k__Bacteria; p__Proteobacteria; c__Gammaproteobacteria; o__Alteromonadales; f__Colwelliaceae; g__Thalassomonas; s__	6e-31
New.ReferenceOTU14618	NA	NA	NA	4.87068	5.57338	0.00151306		k__Bacteria; p__Proteobacteria; c__Gammaproteobacteria; o__Alteromonadales; f__Colwelliaceae; g__Thalassomonas; s__	4e-26
New.ReferenceOTU7748	NA	NA	NA	4.60505	4.73338	0.0149174		k__Bacteria; p__Proteobacteria; c__Gammaproteobacteria; o__Alteromonadales; f__Colwelliaceae; g__Thalassomonas; s__	2e-18
New.ReferenceOTU16968	NA	NA	NA	2.3728	4.45146	0.0224978		k__Bacteria; p__Proteobacteria; c__Gammaproteobacteria; o__Alteromonadales; f__Colwelliaceae; g__Thalassomonas; s__	1e-19
New.ReferenceOTU19496	NA	NA	NA	1.68247	4.39299	0.0225891		k__Bacteria; p__Proteobacteria; c__Gammaproteobacteria; o__Alteromonadales; f__Colwelliaceae; g__Thalassomonas; s__	3e-23
New.ReferenceOTU27748	NA	NA	NA	5.4189	4.01335	0.0402277		k__Bacteria; p__Proteobacteria; c__Gammaproteobacteria; o__Alteromonadales; f__Colwelliaceae; g__Thalassomonas; s__	4e-22
New.ReferenceOTU25659	NA	NA	NA	1.47403	3.9925	0.0476945		k__Bacteria; p__Proteobacteria; c__Gammaproteobacteria; o__Alteromonadales; f__Colwelliaceae; g__Thalassomonas; s__	3e-20
824169	7.07191	5.68824	5.52e-06	NA	NA	NA		k__Bacteria; p__Proteobacteria; c__Gammaproteobacteria; o__Alteromonadales; f__Colwelliaceae; g__Thalassomonas; s__	1e-35
4313853	1.53132	4.97799	0.000597491	NA	NA	NA		k__Bacteria; p__Proteobacteria; c__Gammaproteobacteria; o__Alteromonadales; f__Colwelliaceae; g__Thalassomonas; s__	1e-35
New.ReferenceOTU21859	0.941355	5.41078	0.00335817	NA	NA	NA		k__Bacteria; p__Proteobacteria; c__Gammaproteobacteria; o__Alteromonadales; f__Colwelliaceae; g__Thalassomonas; s__	4e-22
New.ReferenceOTU20466	1.0913	3.95956	0.0131543	NA	NA	NA		k__Bacteria; p__Proteobacteria; c__Gammaproteobacteria; o__Alteromonadales; f__Colwelliaceae; g__Thalassomonas; s__	3e-23
New.ReferenceOTU27111	0.707837	4.87297	0.0134897	NA	NA	NA		k__Bacteria; p__Proteobacteria; c__Gammaproteobacteria; o__Alteromonadales; f__Colwelliaceae; g__Thalassomonas; s__	4e-22
246806	11.3732	2.48651	0.0139093	NA	NA	NA		k__Bacteria; p__Proteobacteria; c__Gammaproteobacteria; o__Alteromonadales; f__Colwelliaceae; g__Thalassomonas; s__	1e-35
New.ReferenceOTU3532	0.533457	4.7607	0.0170134	NA	NA	NA		k__Bacteria; p__Proteobacteria; c__Gammaproteobacteria; o__Alteromonadales; f__Colwelliaceae; g__Thalassomonas; s__	4e-22
New.ReferenceOTU19753	1.14186	4.75684	0.0202875	NA	NA	NA		k__Bacteria; p__Proteobacteria; c__Gammaproteobacteria; o__Alteromonadales; f__Colwelliaceae; g__Thalassomonas; s__	4e-22
New.ReferenceOTU29902	0.505772	4.64782	0.0210108	NA	NA	NA		k__Bacteria; p__Proteobacteria; c__Gammaproteobacteria; o__Alteromonadales; f__Colwelliaceae; g__Thalassomonas; s__	4e-22
New.ReferenceOTU5314	0.601346	3.82749	0.0258154	NA	NA	NA		k__Bacteria; p__Proteobacteria; c__Gammaproteobacteria; o__Alteromonadales; f__Colwelliaceae; g__Thalassomonas; s__	3e-23
New.ReferenceOTU2199	0.772808	3.54979	0.0261825	NA	NA	NA		k__Bacteria; p__Proteobacteria; c__Gammaproteobacteria; o__Alteromonadales; f__Colwelliaceae; g__Thalassomonas; s__	4e-22
594414	1.63862	3.61708	0.029368	NA	NA	NA		k__Bacteria; p__Proteobacteria; c__Gammaproteobacteria; o__Alteromonadales; f__Colwelliaceae; g__Thalassomonas; s__	1e-35
594003	0.58561	4.45345	0.0315957	NA	NA	NA		k__Bacteria; p__Proteobacteria; c__Gammaproteobacteria; o__Alteromonadales; f__Colwelliaceae; g__Thalassomonas; s__	4e-32
New.ReferenceOTU29127	0.540085	3.66511	0.0340627	NA	NA	NA		k__Bacteria; p__Proteobacteria; c__Gammaproteobacteria; o__Alteromonadales; f__Colwelliaceae; g__Thalassomonas; s__	4e-22
New.ReferenceOTU27621	0.835517	4.41745	0.0374849	NA	NA	NA		k__Bacteria; p__Proteobacteria; c__Gammaproteobacteria; o__Alteromonadales; f__Colwelliaceae; g__Thalassomonas; s__	7e-12
New.ReferenceOTU14161	0.536321	3.31894	0.0402839	NA	NA	NA		k__Bacteria; p__Proteobacteria; c__Gammaproteobacteria; o__Alteromonadales; f__Colwelliaceae; g__Thalassomonas; s__	4e-22
New.ReferenceOTU28840	0.360555	4.22367	0.0445852	NA	NA	NA		k__Bacteria; p__Proteobacteria; c__Gammaproteobacteria; o__Alteromonadales; f__Colwelliaceae; g__Thalassomonas; s__	1e-22
New.ReferenceOTU3724	0.276	4.16968	0.0473148	NA	NA	NA		k__Bacteria; p__Proteobacteria; c__Gammaproteobacteria; o__Alteromonadales; f__Colwelliaceae; g__Thalassomonas; s__	8e-18
New.ReferenceOTU25218	52.3944	6.36172	5.09e-11	NA	NA	NA		k__Bacteria; p__Proteobacteria; c__Gammaproteobacteria; o__Alteromonadales; f__Ferrimonadaceae; g__Ferrimonas; s__	4e-22
New.ReferenceOTU9235	2.09586	6.06841	0.000573916	NA	NA	NA		k__Bacteria; p__Proteobacteria; c__Gammaproteobacteria; o__Alteromonadales; f__Ferrimonadaceae; g__Ferrimonas; s__	6e-28
2594460	63.9304	4.18099	0.0019262	NA	NA	NA		k__Bacteria; p__Proteobacteria; c__Gammaproteobacteria; o__Alteromonadales; f__Ferrimonadaceae; g__Ferrimonas; s__	1e-35
New.ReferenceOTU7539	0.853157	5.28379	0.00478071	NA	NA	NA		k__Bacteria; p__Proteobacteria; c__Gammaproteobacteria; o__Alteromonadales; f__Ferrimonadaceae; g__Ferrimonas; s__	4e-26
New.ReferenceOTU3945	1.20831	4.47895	0.00660519	NA	NA	NA		k__Bacteria; p__Proteobacteria; c__Gammaproteobacteria; o__Alteromonadales; f__Ferrimonadaceae; g__Ferrimonas; s__	4e-26
New.ReferenceOTU22944	0.859545	5.16674	0.00702164	NA	NA	NA		k__Bacteria; p__Proteobacteria; c__Gammaproteobacteria; o__Alteromonadales; f__Ferrimonadaceae; g__Ferrimonas; s__	4e-26
New.ReferenceOTU32313	0.95864	4.12992	0.0377016	NA	NA	NA		k__Bacteria; p__Proteobacteria; c__Gammaproteobacteria; o__Alteromonadales; f__Ferrimonadaceae; g__Ferrimonas; s__	1e-28
New.ReferenceOTU1624	0.442491	4.27712	0.0437739	NA	NA	NA		k__Bacteria; p__Proteobacteria; c__Gammaproteobacteria; o__Alteromonadales; f__Ferrimonadaceae; g__Ferrimonas; s__	4e-26
535135	1.51374	3.77642	0.0379122	NA	NA	NA		k__Bacteria; p__Proteobacteria; c__Gammaproteobacteria; o__Alteromonadales; f__HTCC2188; g__HTCC; s__	2e-33
210138	3.23575	3.42339	0.0480168	NA	NA	NA		k__Bacteria; p__Proteobacteria; c__Gammaproteobacteria; o__Alteromonadales; f__HTCC2188; g__HTCC; s__	2e-24
New.ReferenceOTU17474	59.9433	5.49981	2.16e-09	NA	NA	NA		k__Bacteria; p__Proteobacteria; c__Gammaproteobacteria; o__Alteromonadales; f__Idiomarinaceae; g__Idiomarina; s__	1e-28
New.ReferenceOTU28266	NA	NA	NA	1.18339	4.11581	0.0366063		k__Bacteria; p__Proteobacteria; c__Gammaproteobacteria; o__Alteromonadales; f__Idiomarinaceae; g__Pseudidiomarina; s__	1e-19
634948	287.157	4.66585	0.000190905	NA	NA	NA		k__Bacteria; p__Proteobacteria; c__Gammaproteobacteria; o__Alteromonadales; f__Idiomarinaceae; g__Pseudidiomarina; s__	1e-35
New.ReferenceOTU25281	NA	NA	NA	1.63624	4.06357	0.0432334		k__Bacteria; p__Proteobacteria; c__Gammaproteobacteria; o__Alteromonadales; f__OM60; g__; s__	5e-22
3423088	10.0634	5.45156	1.16e-08	NA	NA	NA		k__Bacteria; p__Proteobacteria; c__Gammaproteobacteria; o__Alteromonadales; f__OM60; g__; s__	1e-35
4454750	7.21337	2.44644	4.8e-05	NA	NA	NA		k__Bacteria; p__Proteobacteria; c__Gammaproteobacteria; o__Alteromonadales; f__OM60; g__; s__	1e-35
140377	15.9075	6.60415	0.000128906	NA	NA	NA		k__Bacteria; p__Proteobacteria; c__Gammaproteobacteria; o__Alteromonadales; f__OM60; g__; s__	6e-31
338514	3.30978	4.6399	0.000552022	NA	NA	NA		k__Bacteria; p__Proteobacteria; c__Gammaproteobacteria; o__Alteromonadales; f__OM60; g__; s__	4e-35
4358876	4.69101	4.62329	0.00160247	NA	NA	NA		k__Bacteria; p__Proteobacteria; c__Gammaproteobacteria; o__Alteromonadales; f__OM60; g__; s__	1e-35
716061	0.900238	3.60291	0.0310987	NA	NA	NA		k__Bacteria; p__Proteobacteria; c__Gammaproteobacteria; o__Alteromonadales; f__OM60; g__; s__	1e-35
574371	0.649931	4.36204	0.0402839	NA	NA	NA		k__Bacteria; p__Proteobacteria; c__Gammaproteobacteria; o__Alteromonadales; f__OM60; g__; s__	1e-35
New.ReferenceOTU19968	1.19	5.29232	0.00546242	NA	NA	NA		k__Bacteria; p__Proteobacteria; c__Gammaproteobacteria; o__Alteromonadales; f__OM60; g__Congregibacter; s__	1e-28
4423026	5.94312	-3.63927	0.0467096	NA	NA	NA		k__Bacteria; p__Proteobacteria; c__Gammaproteobacteria; o__Alteromonadales; f__Shewanellaceae; g__; s__	1e-35
New.ReferenceOTU13096	NA	NA	NA	40.5309	4.9638	0.00914943		k__Bacteria; p__Proteobacteria; c__Gammaproteobacteria; o__Alteromonadales; f__Shewanellaceae; g__Shewanella; s__	2e-21
New.ReferenceOTU17701	NA	NA	NA	1.55337	4.02531	0.0459249		k__Bacteria; p__Proteobacteria; c__Gammaproteobacteria; o__Alteromonadales; f__Shewanellaceae; g__Shewanella; s__	9e-27
4383670	1.11027	3.98007	0.0129231	NA	NA	NA		k__Bacteria; p__Proteobacteria; c__Gammaproteobacteria; o__Alteromonadales; f__Shewanellaceae; g__Shewanella; s__	2e-33
New.ReferenceOTU2899	0.761358	4.3634	0.0396422	NA	NA	NA		k__Bacteria; p__Proteobacteria; c__Gammaproteobacteria; o__Alteromonadales; f__Shewanellaceae; g__Shewanella; s__	9e-27
562282	NA	NA	NA	5.34366	4.98361	0.0090437		k__Bacteria; p__Proteobacteria; c__Gammaproteobacteria; o__Chromatiales; f__; g__; s__	1e-35
618899	NA	NA	NA	1.65185	4.6838	0.0113152		k__Bacteria; p__Proteobacteria; c__Gammaproteobacteria; o__Chromatiales; f__; g__; s__	2e-34
New.ReferenceOTU28959	157.093	4.91306	8.35e-10	NA	NA	NA		k__Bacteria; p__Proteobacteria; c__Gammaproteobacteria; o__Chromatiales; f__; g__; s__	9e-27
63759	5.0392	-1.6904	0.014009	NA	NA	NA		k__Bacteria; p__Proteobacteria; c__Gammaproteobacteria; o__Chromatiales; f__; g__; s__	6e-34
1107293	15.7134	-2.26468	0.0401409	NA	NA	NA		k__Bacteria; p__Proteobacteria; c__Gammaproteobacteria; o__Chromatiales; f__; g__; s__	2e-33
New.ReferenceOTU5253	NA	NA	NA	4.35023	-4.60291	0.0175121		k__Bacteria; p__Proteobacteria; c__Gammaproteobacteria; o__Chromatiales; f__Ectothiorhodospiraceae; g__; s__	4e-26
New.ReferenceOTU6969	NA	NA	NA	2.05786	4.25371	0.0329656		k__Bacteria; p__Proteobacteria; c__Gammaproteobacteria; o__Chromatiales; f__Ectothiorhodospiraceae; g__Halorhodospira; s__	4e-26
23898	15078.2	5.89341	2.74e-28	NA	NA	NA		k__Bacteria; p__Proteobacteria; c__Gammaproteobacteria; o__Enterobacteriales; f__Enterobacteriaceae; g__; s__	2e-31
1120752	31.5736	6.20658	1.36e-14	NA	NA	NA		k__Bacteria; p__Proteobacteria; c__Gammaproteobacteria; o__Enterobacteriales; f__Enterobacteriaceae; g__; s__	6e-31
New.ReferenceOTU9173	48.495	7.68217	1.9e-14	NA	NA	NA		k__Bacteria; p__Proteobacteria; c__Gammaproteobacteria; o__Enterobacteriales; f__Enterobacteriaceae; g__; s__	9e-27
New.ReferenceOTU12417	58.9975	5.70448	1.56e-13	NA	NA	NA		k__Bacteria; p__Proteobacteria; c__Gammaproteobacteria; o__Enterobacteriales; f__Enterobacteriaceae; g__; s__	4e-29
New.ReferenceOTU18439	40.136	5.94376	7.99e-13	NA	NA	NA		k__Bacteria; p__Proteobacteria; c__Gammaproteobacteria; o__Enterobacteriales; f__Enterobacteriaceae; g__; s__	9e-27
New.ReferenceOTU37060	45.266	6.02743	2.93e-12	NA	NA	NA		k__Bacteria; p__Proteobacteria; c__Gammaproteobacteria; o__Enterobacteriales; f__Enterobacteriaceae; g__; s__	9e-27
2373263	163.221	4.465	1.31e-11	NA	NA	NA		k__Bacteria; p__Proteobacteria; c__Gammaproteobacteria; o__Enterobacteriales; f__Enterobacteriaceae; g__; s__	2e-31
4351284	37.253	4.73025	1.38e-11	NA	NA	NA		k__Bacteria; p__Proteobacteria; c__Gammaproteobacteria; o__Enterobacteriales; f__Enterobacteriaceae; g__; s__	4e-32
New.ReferenceOTU2000	33.5509	6.12247	1.42e-11	NA	NA	NA		k__Bacteria; p__Proteobacteria; c__Gammaproteobacteria; o__Enterobacteriales; f__Enterobacteriaceae; g__; s__	9e-27
New.ReferenceOTU22139	27.5641	6.67145	3.03e-11	NA	NA	NA		k__Bacteria; p__Proteobacteria; c__Gammaproteobacteria; o__Enterobacteriales; f__Enterobacteriaceae; g__; s__	9e-27
New.ReferenceOTU21407	20.7898	6.27896	3.07e-10	NA	NA	NA		k__Bacteria; p__Proteobacteria; c__Gammaproteobacteria; o__Enterobacteriales; f__Enterobacteriaceae; g__; s__	9e-30
New.ReferenceOTU30736	25.8199	5.44844	6e-10	NA	NA	NA		k__Bacteria; p__Proteobacteria; c__Gammaproteobacteria; o__Enterobacteriales; f__Enterobacteriaceae; g__; s__	9e-27
New.ReferenceOTU17816	20.1789	7.04261	7.46e-10	NA	NA	NA		k__Bacteria; p__Proteobacteria; c__Gammaproteobacteria; o__Enterobacteriales; f__Enterobacteriaceae; g__; s__	9e-27
New.ReferenceOTU35100	36.2985	5.10953	3.91e-09	NA	NA	NA		k__Bacteria; p__Proteobacteria; c__Gammaproteobacteria; o__Enterobacteriales; f__Enterobacteriaceae; g__; s__	9e-27
New.ReferenceOTU3892	26.861	5.21335	1.16e-08	NA	NA	NA		k__Bacteria; p__Proteobacteria; c__Gammaproteobacteria; o__Enterobacteriales; f__Enterobacteriaceae; g__; s__	4e-29
New.ReferenceOTU29874	9.52974	5.25054	2.28e-07	NA	NA	NA		k__Bacteria; p__Proteobacteria; c__Gammaproteobacteria; o__Enterobacteriales; f__Enterobacteriaceae; g__; s__	9e-27
New.ReferenceOTU7942	9.20462	6.30468	2.5e-07	NA	NA	NA		k__Bacteria; p__Proteobacteria; c__Gammaproteobacteria; o__Enterobacteriales; f__Enterobacteriaceae; g__; s__	9e-27
New.ReferenceOTU36857	4.77496	7.14502	5.94e-06	NA	NA	NA		k__Bacteria; p__Proteobacteria; c__Gammaproteobacteria; o__Enterobacteriales; f__Enterobacteriaceae; g__; s__	9e-27
New.ReferenceOTU36908	4.81881	7.10545	7.22e-06	NA	NA	NA		k__Bacteria; p__Proteobacteria; c__Gammaproteobacteria; o__Enterobacteriales; f__Enterobacteriaceae; g__; s__	2e-24
New.ReferenceOTU16462	6.84743	6.57837	1.02e-05	NA	NA	NA		k__Bacteria; p__Proteobacteria; c__Gammaproteobacteria; o__Enterobacteriales; f__Enterobacteriaceae; g__; s__	9e-27
New.ReferenceOTU15319	4.64347	7.01837	1.13e-05	NA	NA	NA		k__Bacteria; p__Proteobacteria; c__Gammaproteobacteria; o__Enterobacteriales; f__Enterobacteriaceae; g__; s__	4e-29
New.ReferenceOTU31529	7.3216	4.6588	1.69e-05	NA	NA	NA		k__Bacteria; p__Proteobacteria; c__Gammaproteobacteria; o__Enterobacteriales; f__Enterobacteriaceae; g__; s__	9e-27
New.ReferenceOTU35400	15.633	3.62014	2.88e-05	NA	NA	NA		k__Bacteria; p__Proteobacteria; c__Gammaproteobacteria; o__Enterobacteriales; f__Enterobacteriaceae; g__; s__	6e-31
New.ReferenceOTU31888	10.0701	4.09848	3.21e-05	NA	NA	NA		k__Bacteria; p__Proteobacteria; c__Gammaproteobacteria; o__Enterobacteriales; f__Enterobacteriaceae; g__; s__	4e-29
New.ReferenceOTU12526	4.23333	6.09877	4.07e-05	NA	NA	NA		k__Bacteria; p__Proteobacteria; c__Gammaproteobacteria; o__Enterobacteriales; f__Enterobacteriaceae; g__; s__	9e-27
New.ReferenceOTU23013	3.41098	6.61905	6.34e-05	NA	NA	NA		k__Bacteria; p__Proteobacteria; c__Gammaproteobacteria; o__Enterobacteriales; f__Enterobacteriaceae; g__; s__	2e-27
New.ReferenceOTU875	2.82462	6.41019	0.000140809	NA	NA	NA		k__Bacteria; p__Proteobacteria; c__Gammaproteobacteria; o__Enterobacteriales; f__Enterobacteriaceae; g__; s__	2e-21
New.ReferenceOTU15101	4.24424	5.68359	0.00015103	NA	NA	NA		k__Bacteria; p__Proteobacteria; c__Gammaproteobacteria; o__Enterobacteriales; f__Enterobacteriaceae; g__; s__	6e-28
New.ReferenceOTU12741	2.2025	6.34631	0.000159704	NA	NA	NA		k__Bacteria; p__Proteobacteria; c__Gammaproteobacteria; o__Enterobacteriales; f__Enterobacteriaceae; g__; s__	3e-20
New.ReferenceOTU8780	4.69118	4.59952	0.000219698	NA	NA	NA		k__Bacteria; p__Proteobacteria; c__Gammaproteobacteria; o__Enterobacteriales; f__Enterobacteriaceae; g__; s__	7e-24
New.ReferenceOTU10325	2.62354	6.27418	0.000237358	NA	NA	NA		k__Bacteria; p__Proteobacteria; c__Gammaproteobacteria; o__Enterobacteriales; f__Enterobacteriaceae; g__; s__	9e-27
New.ReferenceOTU34427	2.73926	5.60021	0.000268264	NA	NA	NA		k__Bacteria; p__Proteobacteria; c__Gammaproteobacteria; o__Enterobacteriales; f__Enterobacteriaceae; g__; s__	9e-27
New.ReferenceOTU12974	2.29173	6.18182	0.000319911	NA	NA	NA		k__Bacteria; p__Proteobacteria; c__Gammaproteobacteria; o__Enterobacteriales; f__Enterobacteriaceae; g__; s__	9e-27
New.ReferenceOTU539	4.90846	4.63527	0.000360881	NA	NA	NA		k__Bacteria; p__Proteobacteria; c__Gammaproteobacteria; o__Enterobacteriales; f__Enterobacteriaceae; g__; s__	9e-27
New.ReferenceOTU6093	2.30194	6.06152	0.000508544	NA	NA	NA		k__Bacteria; p__Proteobacteria; c__Gammaproteobacteria; o__Enterobacteriales; f__Enterobacteriaceae; g__; s__	9e-27
New.ReferenceOTU22080	1.606	5.91286	0.000729361	NA	NA	NA		k__Bacteria; p__Proteobacteria; c__Gammaproteobacteria; o__Enterobacteriales; f__Enterobacteriaceae; g__; s__	1e-19
New.ReferenceOTU35520	2.05669	5.94682	0.000729361	NA	NA	NA		k__Bacteria; p__Proteobacteria; c__Gammaproteobacteria; o__Enterobacteriales; f__Enterobacteriaceae; g__; s__	6e-18
New.ReferenceOTU30630	1.64875	5.89023	0.000806519	NA	NA	NA		k__Bacteria; p__Proteobacteria; c__Gammaproteobacteria; o__Enterobacteriales; f__Enterobacteriaceae; g__; s__	2e-18
New.ReferenceOTU8905	2.33834	4.83692	0.000923323	NA	NA	NA		k__Bacteria; p__Proteobacteria; c__Gammaproteobacteria; o__Enterobacteriales; f__Enterobacteriaceae; g__; s__	1e-28
New.ReferenceOTU30629	1.81893	5.24086	0.00100547	NA	NA	NA		k__Bacteria; p__Proteobacteria; c__Gammaproteobacteria; o__Enterobacteriales; f__Enterobacteriaceae; g__; s__	9e-27
New.ReferenceOTU9225	1.95803	5.79998	0.00120263	NA	NA	NA		k__Bacteria; p__Proteobacteria; c__Gammaproteobacteria; o__Enterobacteriales; f__Enterobacteriaceae; g__; s__	6e-18
New.ReferenceOTU5722	1.97768	5.79342	0.00122813	NA	NA	NA		k__Bacteria; p__Proteobacteria; c__Gammaproteobacteria; o__Enterobacteriales; f__Enterobacteriaceae; g__; s__	7e-21
New.ReferenceOTU3298	1.53888	5.75973	0.00125417	NA	NA	NA		k__Bacteria; p__Proteobacteria; c__Gammaproteobacteria; o__Enterobacteriales; f__Enterobacteriaceae; g__; s__	9e-27
New.ReferenceOTU27442	2.57006	4.50911	0.00201693	NA	NA	NA		k__Bacteria; p__Proteobacteria; c__Gammaproteobacteria; o__Enterobacteriales; f__Enterobacteriaceae; g__; s__	9e-27
New.ReferenceOTU33939	1.3399	5.58237	0.00208831	NA	NA	NA		k__Bacteria; p__Proteobacteria; c__Gammaproteobacteria; o__Enterobacteriales; f__Enterobacteriaceae; g__; s__	5e-22
New.ReferenceOTU8594	2.25393	4.34	0.00287142	NA	NA	NA		k__Bacteria; p__Proteobacteria; c__Gammaproteobacteria; o__Enterobacteriales; f__Enterobacteriaceae; g__; s__	1e-19
New.ReferenceOTU27147	1.02079	5.45196	0.00289362	NA	NA	NA		k__Bacteria; p__Proteobacteria; c__Gammaproteobacteria; o__Enterobacteriales; f__Enterobacteriaceae; g__; s__	3e-23
New.ReferenceOTU6756	1.92309	4.53715	0.00310381	NA	NA	NA		k__Bacteria; p__Proteobacteria; c__Gammaproteobacteria; o__Enterobacteriales; f__Enterobacteriaceae; g__; s__	2e-18
New.ReferenceOTU2025	1.29127	5.45157	0.00313549	NA	NA	NA		k__Bacteria; p__Proteobacteria; c__Gammaproteobacteria; o__Enterobacteriales; f__Enterobacteriaceae; g__; s__	6e-18
New.ReferenceOTU36491	1.54063	4.86293	0.00388098	NA	NA	NA		k__Bacteria; p__Proteobacteria; c__Gammaproteobacteria; o__Enterobacteriales; f__Enterobacteriaceae; g__; s__	6e-25
New.ReferenceOTU11987	1.72723	4.50912	0.00450763	NA	NA	NA		k__Bacteria; p__Proteobacteria; c__Gammaproteobacteria; o__Enterobacteriales; f__Enterobacteriaceae; g__; s__	9e-27
New.ReferenceOTU22605	1.15203	5.30396	0.00461051	NA	NA	NA		k__Bacteria; p__Proteobacteria; c__Gammaproteobacteria; o__Enterobacteriales; f__Enterobacteriaceae; g__; s__	1e-07
New.ReferenceOTU32758	1.0728	5.2916	0.00466298	NA	NA	NA		k__Bacteria; p__Proteobacteria; c__Gammaproteobacteria; o__Enterobacteriales; f__Enterobacteriaceae; g__; s__	4e-26
New.ReferenceOTU35131	0.834368	5.25507	0.00476173	NA	NA	NA		k__Bacteria; p__Proteobacteria; c__Gammaproteobacteria; o__Enterobacteriales; f__Enterobacteriaceae; g__; s__	3e-20
New.ReferenceOTU8248	2.30943	3.98141	0.00580665	NA	NA	NA		k__Bacteria; p__Proteobacteria; c__Gammaproteobacteria; o__Enterobacteriales; f__Enterobacteriaceae; g__; s__	2e-18
New.ReferenceOTU8486	0.754185	5.14641	0.0063896	NA	NA	NA		k__Bacteria; p__Proteobacteria; c__Gammaproteobacteria; o__Enterobacteriales; f__Enterobacteriaceae; g__; s__	2e-24
New.ReferenceOTU7922	1.59872	4.10402	0.0070084	NA	NA	NA		k__Bacteria; p__Proteobacteria; c__Gammaproteobacteria; o__Enterobacteriales; f__Enterobacteriaceae; g__; s__	6e-18
New.ReferenceOTU29865	0.839438	5.10595	0.00772648	NA	NA	NA		k__Bacteria; p__Proteobacteria; c__Gammaproteobacteria; o__Enterobacteriales; f__Enterobacteriaceae; g__; s__	2e-18
New.ReferenceOTU37304	0.83864	5.0734	0.00797725	NA	NA	NA		k__Bacteria; p__Proteobacteria; c__Gammaproteobacteria; o__Enterobacteriales; f__Enterobacteriaceae; g__; s__	1e-19
New.ReferenceOTU3612	0.762529	5.02025	0.008992	NA	NA	NA		k__Bacteria; p__Proteobacteria; c__Gammaproteobacteria; o__Enterobacteriales; f__Enterobacteriaceae; g__; s__	6e-28
New.ReferenceOTU27877	0.72246	5.0145	0.00899261	NA	NA	NA		k__Bacteria; p__Proteobacteria; c__Gammaproteobacteria; o__Enterobacteriales; f__Enterobacteriaceae; g__; s__	4e-19
New.ReferenceOTU13183	0.803294	5.01769	0.00909412	NA	NA	NA		k__Bacteria; p__Proteobacteria; c__Gammaproteobacteria; o__Enterobacteriales; f__Enterobacteriaceae; g__; s__	3e-20
New.ReferenceOTU13081	0.690488	4.96722	0.00996524	NA	NA	NA		k__Bacteria; p__Proteobacteria; c__Gammaproteobacteria; o__Enterobacteriales; f__Enterobacteriaceae; g__; s__	1e-25
New.ReferenceOTU28011	1.03622	4.94005	0.0116724	NA	NA	NA		k__Bacteria; p__Proteobacteria; c__Gammaproteobacteria; o__Enterobacteriales; f__Enterobacteriaceae; g__; s__	2e-21
65942	3.04632	4.98048	0.0137188	NA	NA	NA		k__Bacteria; p__Proteobacteria; c__Gammaproteobacteria; o__Enterobacteriales; f__Enterobacteriaceae; g__; s__	4e-32
New.ReferenceOTU25224	0.519435	4.70818	0.0175876	NA	NA	NA		k__Bacteria; p__Proteobacteria; c__Gammaproteobacteria; o__Enterobacteriales; f__Enterobacteriaceae; g__; s__	2e-21
New.ReferenceOTU11037	0.707502	4.73228	0.0181594	NA	NA	NA		k__Bacteria; p__Proteobacteria; c__Gammaproteobacteria; o__Enterobacteriales; f__Enterobacteriaceae; g__; s__	5e-13
New.ReferenceOTU5086	0.856558	3.75174	0.0188493	NA	NA	NA		k__Bacteria; p__Proteobacteria; c__Gammaproteobacteria; o__Enterobacteriales; f__Enterobacteriaceae; g__; s__	6e-18
New.ReferenceOTU7877	0.517467	4.66744	0.0193352	NA	NA	NA		k__Bacteria; p__Proteobacteria; c__Gammaproteobacteria; o__Enterobacteriales; f__Enterobacteriaceae; g__; s__	6e-18
New.ReferenceOTU36289	0.590325	4.66932	0.0197833	NA	NA	NA		k__Bacteria; p__Proteobacteria; c__Gammaproteobacteria; o__Enterobacteriales; f__Enterobacteriaceae; g__; s__	2e-24
New.ReferenceOTU18469	1.10391	3.58772	0.0199322	NA	NA	NA		k__Bacteria; p__Proteobacteria; c__Gammaproteobacteria; o__Enterobacteriales; f__Enterobacteriaceae; g__; s__	3e-14
New.ReferenceOTU17766	0.871851	4.13969	0.0230097	NA	NA	NA		k__Bacteria; p__Proteobacteria; c__Gammaproteobacteria; o__Enterobacteriales; f__Enterobacteriaceae; g__; s__	1e-22
New.ReferenceOTU30772	0.495779	4.57599	0.0241534	NA	NA	NA		k__Bacteria; p__Proteobacteria; c__Gammaproteobacteria; o__Enterobacteriales; f__Enterobacteriaceae; g__; s__	6e-18
New.ReferenceOTU18667	0.845464	4.57835	0.0247638	NA	NA	NA		k__Bacteria; p__Proteobacteria; c__Gammaproteobacteria; o__Enterobacteriales; f__Enterobacteriaceae; g__; s__	6e-18
New.ReferenceOTU25616	0.51938	4.53172	0.0257019	NA	NA	NA		k__Bacteria; p__Proteobacteria; c__Gammaproteobacteria; o__Enterobacteriales; f__Enterobacteriaceae; g__; s__	3e-20
New.ReferenceOTU22469	0.510588	4.51357	0.0265308	NA	NA	NA		k__Bacteria; p__Proteobacteria; c__Gammaproteobacteria; o__Enterobacteriales; f__Enterobacteriaceae; g__; s__	6e-18
New.ReferenceOTU34151	0.823523	4.54032	0.0270651	NA	NA	NA		k__Bacteria; p__Proteobacteria; c__Gammaproteobacteria; o__Enterobacteriales; f__Enterobacteriaceae; g__; s__	2e-15
New.ReferenceOTU28345	0.657804	4.46306	0.0304777	NA	NA	NA		k__Bacteria; p__Proteobacteria; c__Gammaproteobacteria; o__Enterobacteriales; f__Enterobacteriaceae; g__; s__	3e-26
New.ReferenceOTU19581	1.18097	3.24572	0.0306093	NA	NA	NA		k__Bacteria; p__Proteobacteria; c__Gammaproteobacteria; o__Enterobacteriales; f__Enterobacteriaceae; g__; s__	2e-18
New.ReferenceOTU18045	0.528543	4.44273	0.0325799	NA	NA	NA		k__Bacteria; p__Proteobacteria; c__Gammaproteobacteria; o__Enterobacteriales; f__Enterobacteriaceae; g__; s__	3e-20
New.ReferenceOTU7464	1.83172	2.89955	0.0325864	NA	NA	NA		k__Bacteria; p__Proteobacteria; c__Gammaproteobacteria; o__Enterobacteriales; f__Enterobacteriaceae; g__; s__	2e-30
New.ReferenceOTU36933	0.440842	4.23734	0.0439978	NA	NA	NA		k__Bacteria; p__Proteobacteria; c__Gammaproteobacteria; o__Enterobacteriales; f__Enterobacteriaceae; g__; s__	2e-17
New.ReferenceOTU37403	0.811377	3.71506	0.0452603	NA	NA	NA		k__Bacteria; p__Proteobacteria; c__Gammaproteobacteria; o__Enterobacteriales; f__Enterobacteriaceae; g__; s__	6e-18
2529285	1.64707	3.80109	0.0460468	NA	NA	NA		k__Bacteria; p__Proteobacteria; c__Gammaproteobacteria; o__Enterobacteriales; f__Enterobacteriaceae; g__; s__	6e-31
New.ReferenceOTU3207	NA	NA	NA	NA	NA	NA		k__Bacteria; p__Proteobacteria; c__Gammaproteobacteria; o__Enterobacteriales; f__Enterobacteriaceae; g__; s__	2e-30
1010113	5.92046	-4.9645	0.000345037	NA	NA	NA		k__Bacteria; p__Proteobacteria; c__Gammaproteobacteria; o__Enterobacteriales; f__Enterobacteriaceae; g__Erwinia; s__	1e-35
New.ReferenceOTU37086	NA	NA	NA	NA	NA	NA		k__Bacteria; p__Proteobacteria; c__Gammaproteobacteria; o__Enterobacteriales; f__Enterobacteriaceae; g__Erwinia; s__	4e-29
10365	2.43423	5.35882	0.00581034	NA	NA	NA		k__Bacteria; p__Proteobacteria; c__Gammaproteobacteria; o__Enterobacteriales; f__Enterobacteriaceae; g__Yersinia; s__	7e-27
New.ReferenceOTU5776	0.689363	4.54667	0.0289599	NA	NA	NA		k__Bacteria; p__Proteobacteria; c__Gammaproteobacteria; o__HOC36; f__; g__; s__	6e-25
New.ReferenceOTU11882	NA	NA	NA	3.87843	4.07074	0.0479432		k__Bacteria; p__Proteobacteria; c__Gammaproteobacteria; o__HTCC2188; f__; g__; s__	5e-19
New.ReferenceOTU33602	287.403	6.11919	0.000110716	NA	NA	NA		k__Bacteria; p__Proteobacteria; c__Gammaproteobacteria; o__HTCC2188; f__HTCC2089; g__; s__	6e-25
880783	15.748	2.67749	0.0125209	NA	NA	NA		k__Bacteria; p__Proteobacteria; c__Gammaproteobacteria; o__HTCC2188; f__HTCC2089; g__; s__	1e-35
New.ReferenceOTU33156	NA	NA	NA	3.22498	3.88166	0.0155038		k__Bacteria; p__Proteobacteria; c__Gammaproteobacteria; o__Legionellales; f__; g__; s__	5e-16
New.ReferenceOTU790	NA	NA	NA	34.1621	4.81877	0.0157181		k__Bacteria; p__Proteobacteria; c__Gammaproteobacteria; o__Legionellales; f__; g__; s__	1e-28
New.ReferenceOTU10683	NA	NA	NA	174.461	3.48531	0.000792573		k__Bacteria; p__Proteobacteria; c__Gammaproteobacteria; o__Legionellales; f__Coxiellaceae; g__; s__	5e-13
201122	NA	NA	NA	102.018	4.66578	0.00356911		k__Bacteria; p__Proteobacteria; c__Gammaproteobacteria; o__Legionellales; f__Coxiellaceae; g__; s__	2e-33
1122884	NA	NA	NA	3.1381	4.65805	0.015739		k__Bacteria; p__Proteobacteria; c__Gammaproteobacteria; o__Legionellales; f__Coxiellaceae; g__; s__	1e-32
New.ReferenceOTU13185	NA	NA	NA	1.48518	4.00597	0.0467205		k__Bacteria; p__Proteobacteria; c__Gammaproteobacteria; o__Legionellales; f__Coxiellaceae; g__; s__	5e-13
New.ReferenceOTU2276	3.71681	5.57477	0.00333499	NA	NA	NA		k__Bacteria; p__Proteobacteria; c__Gammaproteobacteria; o__Legionellales; f__Coxiellaceae; g__; s__	1e-28
New.ReferenceOTU8384	1.62541	4.8694	0.00373858	NA	NA	NA		k__Bacteria; p__Proteobacteria; c__Gammaproteobacteria; o__Legionellales; f__Coxiellaceae; g__; s__	1e-07
237976	NA	NA	NA	NA	NA	NA		k__Bacteria; p__Proteobacteria; c__Gammaproteobacteria; o__Legionellales; f__Coxiellaceae; g__Rickettsiella; s__	1e-35
New.ReferenceOTU4821	7.21498	5.47151	0.000632296	NA	NA	NA		k__Bacteria; p__Proteobacteria; c__Gammaproteobacteria; o__Legionellales; f__Francisellaceae; g__; s__	2e-17
New.ReferenceOTU3367	6.4342	5.19466	0.00713798	NA	NA	NA		k__Bacteria; p__Proteobacteria; c__Gammaproteobacteria; o__Legionellales; f__Francisellaceae; g__; s__	1e-28
New.ReferenceOTU15437	0.474823	4.68479	0.0184582	NA	NA	NA		k__Bacteria; p__Proteobacteria; c__Gammaproteobacteria; o__Legionellales; f__Francisellaceae; g__; s__	4e-32
New.ReferenceOTU31193	5.368	1.59685	0.0199322	NA	NA	NA		k__Bacteria; p__Proteobacteria; c__Gammaproteobacteria; o__Legionellales; f__Francisellaceae; g__; s__	1e-28
New.ReferenceOTU10693	1.00796	2.73108	0.0215429	NA	NA	NA		k__Bacteria; p__Proteobacteria; c__Gammaproteobacteria; o__Legionellales; f__Francisellaceae; g__; s__	2e-33
New.ReferenceOTU14272	3.05235	3.21757	0.0230871	NA	NA	NA		k__Bacteria; p__Proteobacteria; c__Gammaproteobacteria; o__Legionellales; f__Francisellaceae; g__; s__	4e-32
New.ReferenceOTU18664	1.03895	4.22391	0.0234862	NA	NA	NA		k__Bacteria; p__Proteobacteria; c__Gammaproteobacteria; o__Legionellales; f__Francisellaceae; g__; s__	8e-18
New.ReferenceOTU31371	0.3564	4.32119	0.035442	NA	NA	NA		k__Bacteria; p__Proteobacteria; c__Gammaproteobacteria; o__Legionellales; f__Francisellaceae; g__; s__	1e-22
New.ReferenceOTU8027	0.362709	4.27436	0.0411079	NA	NA	NA		k__Bacteria; p__Proteobacteria; c__Gammaproteobacteria; o__Legionellales; f__Francisellaceae; g__; s__	3e-23
New.ReferenceOTU19482	0.302579	4.1988	0.0447673	NA	NA	NA		k__Bacteria; p__Proteobacteria; c__Gammaproteobacteria; o__Legionellales; f__Francisellaceae; g__; s__	1e-22
New.ReferenceOTU27206	0.34003	4.1705	0.0485564	NA	NA	NA		k__Bacteria; p__Proteobacteria; c__Gammaproteobacteria; o__Legionellales; f__Francisellaceae; g__; s__	3e-23
New.ReferenceOTU37032	NA	NA	NA	3.1452	5.0257	0.00634144		k__Bacteria; p__Proteobacteria; c__Gammaproteobacteria; o__Legionellales; f__Francisellaceae; g__Francisella; s__	4e-26
New.ReferenceOTU7610	NA	NA	NA	5.59579	3.97122	0.0287413		k__Bacteria; p__Proteobacteria; c__Gammaproteobacteria; o__Legionellales; f__Francisellaceae; g__Francisella; s__	5e-22
New.ReferenceOTU21152	NA	NA	NA	4.02206	3.9039	0.039465		k__Bacteria; p__Proteobacteria; c__Gammaproteobacteria; o__Legionellales; f__Francisellaceae; g__Francisella; s__	5e-22
263797	70.8738	5.56333	3.8e-05	NA	NA	NA		k__Bacteria; p__Proteobacteria; c__Gammaproteobacteria; o__Legionellales; f__Francisellaceae; g__Francisella; s__	6e-31
New.ReferenceOTU83	327.63	5.88749	0.000313596	NA	NA	NA		k__Bacteria; p__Proteobacteria; c__Gammaproteobacteria; o__Legionellales; f__Legionellaceae; g__Tatlockia; s__	1e-07
New.ReferenceOTU19854	NA	NA	NA	2.00892	4.53168	0.0175874		k__Bacteria; p__Proteobacteria; c__Gammaproteobacteria; o__Methylococcales; f__Methylococcaceae; g__Methylocaldum; s__	4e-26
4453395	0.600254	4.71368	0.0195702	NA	NA	NA		k__Bacteria; p__Proteobacteria; c__Gammaproteobacteria; o__Methylococcales; f__Methylococcaceae; g__Methylocaldum; s__	2e-33
535589	NA	NA	NA	1.97557	4.18399	0.0368352		k__Bacteria; p__Proteobacteria; c__Gammaproteobacteria; o__Oceanospirillales; f__; g__; s__	2e-33
1129626	NA	NA	NA	1.64653	4.00645	0.0475259		k__Bacteria; p__Proteobacteria; c__Gammaproteobacteria; o__Oceanospirillales; f__; g__; s__	1e-35
New.ReferenceOTU4108	2.70436	2.96308	0.00448585	NA	NA	NA		k__Bacteria; p__Proteobacteria; c__Gammaproteobacteria; o__Oceanospirillales; f__; g__; s__	4e-29
722984	53.1494	-2.56773	0.0049058	NA	NA	NA		k__Bacteria; p__Proteobacteria; c__Gammaproteobacteria; o__Oceanospirillales; f__; g__; s__	2e-33
564590	22762.2	-3.30403	3.53e-06	NA	NA	NA		k__Bacteria; p__Proteobacteria; c__Gammaproteobacteria; o__Oceanospirillales; f__Endozoicimonaceae; g__; s__	1e-35
109431	13263.5	-2.60453	0.000448075	NA	NA	NA		k__Bacteria; p__Proteobacteria; c__Gammaproteobacteria; o__Oceanospirillales; f__Endozoicimonaceae; g__; s__	1e-35
New.ReferenceOTU5989	12.7574	3.04173	0.0012517	NA	NA	NA		k__Bacteria; p__Proteobacteria; c__Gammaproteobacteria; o__Oceanospirillales; f__Endozoicimonaceae; g__; s__	1e-28
167083	68.7041	-2.58034	0.00172104	NA	NA	NA		k__Bacteria; p__Proteobacteria; c__Gammaproteobacteria; o__Oceanospirillales; f__Endozoicimonaceae; g__; s__	2e-33
335717	16.5963	-2.66625	0.00466969	NA	NA	NA		k__Bacteria; p__Proteobacteria; c__Gammaproteobacteria; o__Oceanospirillales; f__Endozoicimonaceae; g__; s__	2e-33
902836	15.4547	-2.59842	0.00843044	NA	NA	NA		k__Bacteria; p__Proteobacteria; c__Gammaproteobacteria; o__Oceanospirillales; f__Endozoicimonaceae; g__; s__	4e-35
New.ReferenceOTU7698	1.87494	3.8616	0.0234572	NA	NA	NA		k__Bacteria; p__Proteobacteria; c__Gammaproteobacteria; o__Oceanospirillales; f__Endozoicimonaceae; g__; s__	4e-22
New.ReferenceOTU20	83.1393	-2.54454	0.0258154	NA	NA	NA		k__Bacteria; p__Proteobacteria; c__Gammaproteobacteria; o__Oceanospirillales; f__Endozoicimonaceae; g__; s__	6e-28
New.ReferenceOTU3470	4.88395	1.72355	0.0337218	NA	NA	NA		k__Bacteria; p__Proteobacteria; c__Gammaproteobacteria; o__Oceanospirillales; f__Endozoicimonaceae; g__; s__	2e-33
New.ReferenceOTU31143	0.324654	-2.83291	0.034471	NA	NA	NA		k__Bacteria; p__Proteobacteria; c__Gammaproteobacteria; o__Oceanospirillales; f__Endozoicimonaceae; g__; s__	8e-21
230774	58.3558	-2.71161	4.67e-05	NA	NA	NA		k__Bacteria; p__Proteobacteria; c__Gammaproteobacteria; o__Oceanospirillales; f__Halomonadaceae; g__Candidatus Portiera; s__	1e-35
New.ReferenceOTU7874	3.6003	-3.02597	0.00103262	NA	NA	NA		k__Bacteria; p__Proteobacteria; c__Gammaproteobacteria; o__Oceanospirillales; f__Halomonadaceae; g__Candidatus Portiera; s__	4e-22
691149	12.7514	-2.03909	0.0429892	NA	NA	NA		k__Bacteria; p__Proteobacteria; c__Gammaproteobacteria; o__Oceanospirillales; f__Halomonadaceae; g__Candidatus Portiera; s__	4e-35
92209	0.894091	4.34536	0.0436626	NA	NA	NA		k__Bacteria; p__Proteobacteria; c__Gammaproteobacteria; o__Oceanospirillales; f__Halomonadaceae; g__Candidatus Portiera; s__	2e-33
144207	6.2289	-3.64737	0.00911393	NA	NA	NA		k__Bacteria; p__Proteobacteria; c__Gammaproteobacteria; o__Oceanospirillales; f__Halomonadaceae; g__Haererehalobacter; s__salaria	1e-35
30146	9.1754	-2.8615	0.0246791	NA	NA	NA		k__Bacteria; p__Proteobacteria; c__Gammaproteobacteria; o__Oceanospirillales; f__Halomonadaceae; g__Halomonas; s__	1e-35
2299689	NA	NA	NA	45.7386	5.94581	0.000282023		k__Bacteria; p__Proteobacteria; c__Gammaproteobacteria; o__Oceanospirillales; f__Oceanospirillaceae; g__; s__	1e-35
New.ReferenceOTU1643	NA	NA	NA	16.4651	5.28876	0.00134006		k__Bacteria; p__Proteobacteria; c__Gammaproteobacteria; o__Oceanospirillales; f__Oceanospirillaceae; g__; s__	1e-28
4458669	NA	NA	NA	458.05	4.83225	0.0020844		k__Bacteria; p__Proteobacteria; c__Gammaproteobacteria; o__Oceanospirillales; f__Oceanospirillaceae; g__; s__	1e-35
New.ReferenceOTU12517	NA	NA	NA	5.32139	5.18645	0.00535934		k__Bacteria; p__Proteobacteria; c__Gammaproteobacteria; o__Oceanospirillales; f__Oceanospirillaceae; g__; s__	4e-26
New.ReferenceOTU22997	NA	NA	NA	7.08077	4.85684	0.0126225		k__Bacteria; p__Proteobacteria; c__Gammaproteobacteria; o__Oceanospirillales; f__Oceanospirillaceae; g__; s__	1e-28
New.ReferenceOTU1063	NA	NA	NA	6.21523	4.06655	0.0495431		k__Bacteria; p__Proteobacteria; c__Gammaproteobacteria; o__Oceanospirillales; f__Oceanospirillaceae; g__; s__	2e-17
4343793	1215.39	5.75527	9.57e-23	NA	NA	NA		k__Bacteria; p__Proteobacteria; c__Gammaproteobacteria; o__Oceanospirillales; f__Oceanospirillaceae; g__; s__	1e-35
358464	206.437	6.09369	1.51e-17	NA	NA	NA		k__Bacteria; p__Proteobacteria; c__Gammaproteobacteria; o__Oceanospirillales; f__Oceanospirillaceae; g__; s__	1e-35
4313143	18.2588	5.20451	6.12e-08	NA	NA	NA		k__Bacteria; p__Proteobacteria; c__Gammaproteobacteria; o__Oceanospirillales; f__Oceanospirillaceae; g__; s__	1e-35
4410199	3.64393	6.15344	3.78e-07	NA	NA	NA		k__Bacteria; p__Proteobacteria; c__Gammaproteobacteria; o__Oceanospirillales; f__Oceanospirillaceae; g__; s__	4e-35
326600	0.780885	3.86294	0.00766482	NA	NA	NA		k__Bacteria; p__Proteobacteria; c__Gammaproteobacteria; o__Oceanospirillales; f__Oceanospirillaceae; g__; s__	6e-34
3270407	1.76405	3.93959	0.0241876	NA	NA	NA		k__Bacteria; p__Proteobacteria; c__Gammaproteobacteria; o__Oceanospirillales; f__Oceanospirillaceae; g__; s__	1e-35
New.ReferenceOTU21409	0.4554	3.65806	0.0249265	NA	NA	NA		k__Bacteria; p__Proteobacteria; c__Gammaproteobacteria; o__Oceanospirillales; f__Oceanospirillaceae; g__; s__	1e-28
4481999	0.438796	4.24016	0.0436153	NA	NA	NA		k__Bacteria; p__Proteobacteria; c__Gammaproteobacteria; o__Oceanospirillales; f__Oceanospirillaceae; g__; s__	6e-31
4399489	15.1841	6.21633	4.68e-12	NA	NA	NA		k__Bacteria; p__Proteobacteria; c__Gammaproteobacteria; o__Oceanospirillales; f__Oceanospirillaceae; g__Marinobacterium; s__	1e-35
New.ReferenceOTU30061	NA	NA	NA	21.0858	6.18877	0.000495722		k__Bacteria; p__Proteobacteria; c__Gammaproteobacteria; o__Oceanospirillales; f__Oceanospirillaceae; g__Marinomonas; s__	2e-33
New.ReferenceOTU33338	NA	NA	NA	7.41142	5.07567	0.00798891		k__Bacteria; p__Proteobacteria; c__Gammaproteobacteria; o__Oceanospirillales; f__Oceanospirillaceae; g__Marinomonas; s__	1e-28
New.ReferenceOTU22956	NA	NA	NA	1.70532	4.4511	0.0204701		k__Bacteria; p__Proteobacteria; c__Gammaproteobacteria; o__Oceanospirillales; f__Oceanospirillaceae; g__Marinomonas; s__	9e-24
New.ReferenceOTU319	NA	NA	NA	1.59488	4.10927	0.0400087		k__Bacteria; p__Proteobacteria; c__Gammaproteobacteria; o__Oceanospirillales; f__Oceanospirillaceae; g__Marinomonas; s__	9e-24
669175	18.8961	-4.15925	0.00275372	NA	NA	NA		k__Bacteria; p__Proteobacteria; c__Gammaproteobacteria; o__Oceanospirillales; f__Oceanospirillaceae; g__Marinomonas; s__	1e-35
367944	NA	NA	NA	80.4255	5.28602	0.000391674		k__Bacteria; p__Proteobacteria; c__Gammaproteobacteria; o__Oceanospirillales; f__Oceanospirillaceae; g__Oceanospirillum; s__	1e-35
New.ReferenceOTU29629	NA	NA	NA	1.66983	3.99263	0.0492321		k__Bacteria; p__Proteobacteria; c__Gammaproteobacteria; o__Oceanospirillales; f__Oceanospirillaceae; g__Oleibacter; s__	6e-15
243945	16.8506	6.22331	1.09e-06	NA	NA	NA		k__Bacteria; p__Proteobacteria; c__Gammaproteobacteria; o__Oceanospirillales; f__Oceanospirillaceae; g__Oleibacter; s__	6e-34
New.ReferenceOTU10252	7.67004	4.25787	0.000589645	NA	NA	NA		k__Bacteria; p__Proteobacteria; c__Gammaproteobacteria; o__Oceanospirillales; f__Oceanospirillaceae; g__Oleibacter; s__	1e-28
4414344	19.0844	1.8525	0.00268767	NA	NA	NA		k__Bacteria; p__Proteobacteria; c__Gammaproteobacteria; o__Oceanospirillales; f__Oceanospirillaceae; g__Oleibacter; s__	1e-35
1102995	2.10627	5.09	0.0108093	NA	NA	NA		k__Bacteria; p__Proteobacteria; c__Gammaproteobacteria; o__Oceanospirillales; f__Oceanospirillaceae; g__Oleibacter; s__	4e-25
New.ReferenceOTU12587	1.08299	4.80349	0.0191917	NA	NA	NA		k__Bacteria; p__Proteobacteria; c__Gammaproteobacteria; o__Oceanospirillales; f__Oceanospirillaceae; g__Oleibacter; s__	4e-26
New.ReferenceOTU5825	1.10976	4.34273	0.0453568	NA	NA	NA		k__Bacteria; p__Proteobacteria; c__Gammaproteobacteria; o__Oceanospirillales; f__Oceanospirillaceae; g__Oleibacter; s__	1e-28
321939	1.50708	5.95439	0.000703012	NA	NA	NA		k__Bacteria; p__Proteobacteria; c__Gammaproteobacteria; o__Oceanospirillales; f__Oceanospirillaceae; g__Oleispira; s__	1e-35
4410345	7.29577	7.95125	6.54e-08	NA	NA	NA		k__Bacteria; p__Proteobacteria; c__Gammaproteobacteria; o__Oceanospirillales; f__Saccharospirillaceae; g__; s__	1e-35
New.ReferenceOTU14426	0.931076	4.94943	0.0124924	NA	NA	NA		k__Bacteria; p__Proteobacteria; c__Gammaproteobacteria; o__Oceanospirillales; f__Saccharospirillaceae; g__; s__	3e-20
1697817	NA	NA	NA	3.91839	4.15612	0.04168		k__Bacteria; p__Proteobacteria; c__Gammaproteobacteria; o__Oceanospirillales; f__Saccharospirillaceae; g__ML110J-20; s__	1e-35
New.ReferenceOTU21776	NA	NA	NA	6.02763	4.35527	0.0325845		k__Bacteria; p__Proteobacteria; c__Gammaproteobacteria; o__Pasteurellales; f__Pasteurellaceae; g__; s__	3e-11
New.ReferenceOTU31954	27.8643	5.85307	8.31e-11	NA	NA	NA		k__Bacteria; p__Proteobacteria; c__Gammaproteobacteria; o__Pasteurellales; f__Pasteurellaceae; g__; s__	1e-28
616027	12.7222	7.35573	1.28e-08	NA	NA	NA		k__Bacteria; p__Proteobacteria; c__Gammaproteobacteria; o__Pasteurellales; f__Pasteurellaceae; g__; s__	6e-31
New.ReferenceOTU33501	5.02937	5.51469	3.15e-05	NA	NA	NA		k__Bacteria; p__Proteobacteria; c__Gammaproteobacteria; o__Pasteurellales; f__Pasteurellaceae; g__; s__	1e-28
New.ReferenceOTU35028	2.86236	4.51656	0.0019262	NA	NA	NA		k__Bacteria; p__Proteobacteria; c__Gammaproteobacteria; o__Pasteurellales; f__Pasteurellaceae; g__; s__	1e-28
New.ReferenceOTU786	1.18745	5.29473	0.0047628	NA	NA	NA		k__Bacteria; p__Proteobacteria; c__Gammaproteobacteria; o__Pasteurellales; f__Pasteurellaceae; g__; s__	1e-28
New.ReferenceOTU32427	0.629552	3.78696	0.0388491	NA	NA	NA		k__Bacteria; p__Proteobacteria; c__Gammaproteobacteria; o__Pasteurellales; f__Pasteurellaceae; g__; s__	3e-23
4378846	NA	NA	NA	3.49796	4.07841	0.0125736		k__Bacteria; p__Proteobacteria; c__Gammaproteobacteria; o__Pasteurellales; f__Pasteurellaceae; g__Haemophilus; s__parainfluenzae	1e-35
New.ReferenceOTU26105	NA	NA	NA	NA	NA	NA		k__Bacteria; p__Proteobacteria; c__Gammaproteobacteria; o__Pasteurellales; f__Pasteurellaceae; g__Haemophilus; s__parainfluenzae	9e-24
1116669	30.1606	-2.70394	0.00334242	NA	NA	NA		k__Bacteria; p__Proteobacteria; c__Gammaproteobacteria; o__Pseudomonadales; f__Moraxellaceae; g__; s__	1e-35
305129	23.5374	-4.03028	1.17e-07	NA	NA	NA		k__Bacteria; p__Proteobacteria; c__Gammaproteobacteria; o__Pseudomonadales; f__Moraxellaceae; g__Acinetobacter; s__	1e-35
4334053	48.3226	-3.00487	3.49e-07	NA	NA	NA		k__Bacteria; p__Proteobacteria; c__Gammaproteobacteria; o__Pseudomonadales; f__Moraxellaceae; g__Acinetobacter; s__	1e-35
312988	1.04242	-3.22379	0.000360881	NA	NA	NA		k__Bacteria; p__Proteobacteria; c__Gammaproteobacteria; o__Pseudomonadales; f__Moraxellaceae; g__Acinetobacter; s__	2e-27
320016	1.2897	-3.25946	0.00166737	NA	NA	NA		k__Bacteria; p__Proteobacteria; c__Gammaproteobacteria; o__Pseudomonadales; f__Moraxellaceae; g__Acinetobacter; s__	7e-27
1085703	0.386523	-5.61889	0.00371078	NA	NA	NA		k__Bacteria; p__Proteobacteria; c__Gammaproteobacteria; o__Pseudomonadales; f__Moraxellaceae; g__Acinetobacter; s__	1e-35
312742	0.558949	-3.84623	0.00871597	NA	NA	NA		k__Bacteria; p__Proteobacteria; c__Gammaproteobacteria; o__Pseudomonadales; f__Moraxellaceae; g__Acinetobacter; s__	2e-30
995425	0.64876	-2.40593	0.027844	NA	NA	NA		k__Bacteria; p__Proteobacteria; c__Gammaproteobacteria; o__Pseudomonadales; f__Moraxellaceae; g__Acinetobacter; s__	2e-33
349314	3.99149	-2.14065	4.02e-06	NA	NA	NA		k__Bacteria; p__Proteobacteria; c__Gammaproteobacteria; o__Pseudomonadales; f__Moraxellaceae; g__Acinetobacter; s__guillouiae	2e-30
352164	0.398063	-2.87785	0.00128647	NA	NA	NA		k__Bacteria; p__Proteobacteria; c__Gammaproteobacteria; o__Pseudomonadales; f__Moraxellaceae; g__Acinetobacter; s__guillouiae	2e-33
461764	5.72853	-1.7558	0.00194813	NA	NA	NA		k__Bacteria; p__Proteobacteria; c__Gammaproteobacteria; o__Pseudomonadales; f__Moraxellaceae; g__Acinetobacter; s__guillouiae	7e-27
1004791	16.571	-3.25762	0.000897213	NA	NA	NA		k__Bacteria; p__Proteobacteria; c__Gammaproteobacteria; o__Pseudomonadales; f__Moraxellaceae; g__Enhydrobacter; s__	1e-35
New.ReferenceOTU11720	56.918	6.42976	7.7e-15	NA	NA	NA		k__Bacteria; p__Proteobacteria; c__Gammaproteobacteria; o__Pseudomonadales; f__Moraxellaceae; g__Perlucidibaca; s__	4e-26
New.ReferenceOTU31275	35.8677	5.19433	8.25e-11	NA	NA	NA		k__Bacteria; p__Proteobacteria; c__Gammaproteobacteria; o__Pseudomonadales; f__Moraxellaceae; g__Perlucidibaca; s__	4e-26
New.ReferenceOTU25288	35.3657	6.13402	9.78e-11	NA	NA	NA		k__Bacteria; p__Proteobacteria; c__Gammaproteobacteria; o__Pseudomonadales; f__Moraxellaceae; g__Perlucidibaca; s__	2e-21
New.ReferenceOTU635	2.42607	6.22574	0.000279502	NA	NA	NA		k__Bacteria; p__Proteobacteria; c__Gammaproteobacteria; o__Pseudomonadales; f__Moraxellaceae; g__Perlucidibaca; s__	4e-19
New.ReferenceOTU35024	2.11854	6.17263	0.000319033	NA	NA	NA		k__Bacteria; p__Proteobacteria; c__Gammaproteobacteria; o__Pseudomonadales; f__Moraxellaceae; g__Perlucidibaca; s__	4e-19
New.ReferenceOTU12553	3.32653	5.03856	0.000326783	NA	NA	NA		k__Bacteria; p__Proteobacteria; c__Gammaproteobacteria; o__Pseudomonadales; f__Moraxellaceae; g__Perlucidibaca; s__	4e-26
New.ReferenceOTU18210	2.58172	5.81294	0.0012517	NA	NA	NA		k__Bacteria; p__Proteobacteria; c__Gammaproteobacteria; o__Pseudomonadales; f__Moraxellaceae; g__Perlucidibaca; s__	4e-19
New.ReferenceOTU9396	2.0052	5.16792	0.00212196	NA	NA	NA		k__Bacteria; p__Proteobacteria; c__Gammaproteobacteria; o__Pseudomonadales; f__Moraxellaceae; g__Perlucidibaca; s__	4e-19
New.ReferenceOTU8371	1.9206	3.78765	0.00604131	NA	NA	NA		k__Bacteria; p__Proteobacteria; c__Gammaproteobacteria; o__Pseudomonadales; f__Moraxellaceae; g__Perlucidibaca; s__	4e-19
New.ReferenceOTU5186	0.846205	5.0686	0.00831516	NA	NA	NA		k__Bacteria; p__Proteobacteria; c__Gammaproteobacteria; o__Pseudomonadales; f__Moraxellaceae; g__Perlucidibaca; s__	2e-21
New.ReferenceOTU24513	0.878978	5.04082	0.00877715	NA	NA	NA		k__Bacteria; p__Proteobacteria; c__Gammaproteobacteria; o__Pseudomonadales; f__Moraxellaceae; g__Perlucidibaca; s__	1e-25
New.ReferenceOTU8659	0.61776	4.75258	0.0166409	NA	NA	NA		k__Bacteria; p__Proteobacteria; c__Gammaproteobacteria; o__Pseudomonadales; f__Moraxellaceae; g__Perlucidibaca; s__	2e-17
New.ReferenceOTU8219	0.647059	4.6825	0.019585	NA	NA	NA		k__Bacteria; p__Proteobacteria; c__Gammaproteobacteria; o__Pseudomonadales; f__Moraxellaceae; g__Perlucidibaca; s__	2e-21
New.ReferenceOTU4015	2.98076	3.85692	0.0230097	NA	NA	NA		k__Bacteria; p__Proteobacteria; c__Gammaproteobacteria; o__Pseudomonadales; f__Moraxellaceae; g__Perlucidibaca; s__	8e-18
New.ReferenceOTU24436	0.393929	4.39357	0.0325904	NA	NA	NA		k__Bacteria; p__Proteobacteria; c__Gammaproteobacteria; o__Pseudomonadales; f__Moraxellaceae; g__Perlucidibaca; s__	4e-19
New.ReferenceOTU32030	0.425566	4.1766	0.0486145	NA	NA	NA		k__Bacteria; p__Proteobacteria; c__Gammaproteobacteria; o__Pseudomonadales; f__Moraxellaceae; g__Perlucidibaca; s__	1e-28
New.ReferenceOTU29943	1.01795	3.43925	0.0497295	NA	NA	NA		k__Bacteria; p__Proteobacteria; c__Gammaproteobacteria; o__Pseudomonadales; f__Moraxellaceae; g__Perlucidibaca; s__	4e-19
51114	2.16499	-4.09516	0.0085419	NA	NA	NA		k__Bacteria; p__Proteobacteria; c__Gammaproteobacteria; o__Pseudomonadales; f__Moraxellaceae; g__Psychrobacter; s__	1e-35
80188	0.258738	-3.43328	0.0363939	NA	NA	NA		k__Bacteria; p__Proteobacteria; c__Gammaproteobacteria; o__Pseudomonadales; f__Moraxellaceae; g__Psychrobacter; s__	4e-35
New.ReferenceOTU29330	7.56737	6.75574	3.06e-06	NA	NA	NA		k__Bacteria; p__Proteobacteria; c__Gammaproteobacteria; o__Pseudomonadales; f__Moraxellaceae; g__Psychrobacter; s__pulmonis	2e-09
New.ReferenceOTU12603	NA	NA	NA	3.42296	4.75262	0.0130926		k__Bacteria; p__Proteobacteria; c__Gammaproteobacteria; o__Pseudomonadales; f__Pseudomonadaceae; g__; s__	1e-19
267843	23.0721	-3.20957	1.04e-07	NA	NA	NA		k__Bacteria; p__Proteobacteria; c__Gammaproteobacteria; o__Pseudomonadales; f__Pseudomonadaceae; g__; s__	1e-35
277094	2.50824	-2.97243	4.17e-05	NA	NA	NA		k__Bacteria; p__Proteobacteria; c__Gammaproteobacteria; o__Pseudomonadales; f__Pseudomonadaceae; g__; s__	7e-27
New.ReferenceOTU22938	1.64815	5.98457	0.000570848	NA	NA	NA		k__Bacteria; p__Proteobacteria; c__Gammaproteobacteria; o__Pseudomonadales; f__Pseudomonadaceae; g__; s__	4e-29
4454529	6.4524	-3.91744	0.0103698	NA	NA	NA		k__Bacteria; p__Proteobacteria; c__Gammaproteobacteria; o__Pseudomonadales; f__Pseudomonadaceae; g__; s__	1e-35
446356	0.266497	-2.87904	0.049931	NA	NA	NA		k__Bacteria; p__Proteobacteria; c__Gammaproteobacteria; o__Pseudomonadales; f__Pseudomonadaceae; g__; s__	2e-33
1135348	1.82635	-2.83629	0.01824	NA	NA	NA		k__Bacteria; p__Proteobacteria; c__Gammaproteobacteria; o__Pseudomonadales; f__Pseudomonadaceae; g__Azomonas; s__	2e-33
New.ReferenceOTU12537	0.624725	4.24694	0.0486254	NA	NA	NA		k__Bacteria; p__Proteobacteria; c__Gammaproteobacteria; o__Pseudomonadales; f__Pseudomonadaceae; g__Azomonas; s__	8e-21
New.ReferenceOTU6126	0.7895	4.39029	0.0393315	NA	NA	NA		k__Bacteria; p__Proteobacteria; c__Gammaproteobacteria; o__Pseudomonadales; f__Pseudomonadaceae; g__Pseudomonas; s__	4e-26
814067	15.728	-2.25768	0.0229784	NA	NA	NA		k__Bacteria; p__Proteobacteria; c__Gammaproteobacteria; o__Salinisphaerales; f__; g__; s__	2e-33
4391481	26.6084	4.09259	0.000191624	NA	NA	NA		k__Bacteria; p__Proteobacteria; c__Gammaproteobacteria; o__Thiohalorhabdales; f__; g__; s__	4e-35
365755	14.409	3.39367	0.00256777	NA	NA	NA		k__Bacteria; p__Proteobacteria; c__Gammaproteobacteria; o__Thiohalorhabdales; f__; g__; s__	1e-32
New.ReferenceOTU9464	NA	NA	NA	193.986	6.1028	0.000915607		k__Bacteria; p__Proteobacteria; c__Gammaproteobacteria; o__Thiotrichales; f__Piscirickettsiaceae; g__; s__	1e-28
New.ReferenceOTU18211	NA	NA	NA	110.72	5.67631	0.00134006		k__Bacteria; p__Proteobacteria; c__Gammaproteobacteria; o__Thiotrichales; f__Piscirickettsiaceae; g__; s__	1e-28
New.ReferenceOTU19315	NA	NA	NA	156.865	5.52892	0.00342461		k__Bacteria; p__Proteobacteria; c__Gammaproteobacteria; o__Thiotrichales; f__Piscirickettsiaceae; g__; s__	1e-28
New.ReferenceOTU1931	NA	NA	NA	11.4101	-5.02947	0.0090437		k__Bacteria; p__Proteobacteria; c__Gammaproteobacteria; o__Thiotrichales; f__Piscirickettsiaceae; g__; s__	2e-21
New.ReferenceOTU5773	NA	NA	NA	2.4343	4.61891	0.015739		k__Bacteria; p__Proteobacteria; c__Gammaproteobacteria; o__Thiotrichales; f__Piscirickettsiaceae; g__; s__	2e-21
113888	NA	NA	NA	3.35904	4.51193	0.0218192		k__Bacteria; p__Proteobacteria; c__Gammaproteobacteria; o__Thiotrichales; f__Piscirickettsiaceae; g__; s__	2e-31
801058	NA	NA	NA	10.4281	2.83253	0.03241		k__Bacteria; p__Proteobacteria; c__Gammaproteobacteria; o__Thiotrichales; f__Piscirickettsiaceae; g__; s__	2e-33
691473	187.582	5.8584	0.0002905	NA	NA	NA		k__Bacteria; p__Proteobacteria; c__Gammaproteobacteria; o__Thiotrichales; f__Piscirickettsiaceae; g__; s__	2e-34
New.ReferenceOTU31728	1.92748	5.58338	0.00297599	NA	NA	NA		k__Bacteria; p__Proteobacteria; c__Gammaproteobacteria; o__Thiotrichales; f__Piscirickettsiaceae; g__; s__	9e-24
1134873	1.14389	5.07257	0.00909412	NA	NA	NA		k__Bacteria; p__Proteobacteria; c__Gammaproteobacteria; o__Thiotrichales; f__Piscirickettsiaceae; g__; s__	1e-35
587067	0.675311	4.31342	0.042498	NA	NA	NA		k__Bacteria; p__Proteobacteria; c__Gammaproteobacteria; o__Thiotrichales; f__Piscirickettsiaceae; g__; s__	6e-34
New.ReferenceOTU36217	4.84098	4.85752	0.0210692	NA	NA	NA		k__Bacteria; p__Proteobacteria; c__Gammaproteobacteria; o__Thiotrichales; f__Piscirickettsiaceae; g__Piscirickettsia; s__salmonis	4e-16
681156	NA	NA	NA	14.2251	6.01982	0.000732614		k__Bacteria; p__Proteobacteria; c__Gammaproteobacteria; o__Thiotrichales; f__Piscirickettsiaceae; g__Thioalkalimicrobium; s__	1e-35
4455686	1.27607	3.84614	0.0300104	NA	NA	NA		k__Bacteria; p__Proteobacteria; c__Gammaproteobacteria; o__Thiotrichales; f__Thiotrichaceae; g__; s__	1e-35
New.ReferenceOTU31300	17.9191	4.74365	7.68e-08	NA	NA	NA		k__Bacteria; p__Proteobacteria; c__Gammaproteobacteria; o__Vibrionales; f__Pseudoalteromonadaceae; g__; s__	1e-28
New.ReferenceOTU36213	8.91288	5.76426	1.99e-06	NA	NA	NA		k__Bacteria; p__Proteobacteria; c__Gammaproteobacteria; o__Vibrionales; f__Pseudoalteromonadaceae; g__; s__	4e-26
New.ReferenceOTU21106	6.45163	7.30851	3.07e-06	NA	NA	NA		k__Bacteria; p__Proteobacteria; c__Gammaproteobacteria; o__Vibrionales; f__Pseudoalteromonadaceae; g__; s__	4e-26
New.ReferenceOTU34423	6.53403	6.66916	5.6e-06	NA	NA	NA		k__Bacteria; p__Proteobacteria; c__Gammaproteobacteria; o__Vibrionales; f__Pseudoalteromonadaceae; g__; s__	4e-26
New.ReferenceOTU22646	4.3453	7.04438	9.26e-06	NA	NA	NA		k__Bacteria; p__Proteobacteria; c__Gammaproteobacteria; o__Vibrionales; f__Pseudoalteromonadaceae; g__; s__	8e-24
New.ReferenceOTU1369	2.38814	6.27959	0.000218917	NA	NA	NA		k__Bacteria; p__Proteobacteria; c__Gammaproteobacteria; o__Vibrionales; f__Pseudoalteromonadaceae; g__; s__	4e-26
New.ReferenceOTU24943	2.62512	5.49613	0.000524376	NA	NA	NA		k__Bacteria; p__Proteobacteria; c__Gammaproteobacteria; o__Vibrionales; f__Pseudoalteromonadaceae; g__; s__	1e-28
New.ReferenceOTU7154	1.97432	5.91222	0.000810908	NA	NA	NA		k__Bacteria; p__Proteobacteria; c__Gammaproteobacteria; o__Vibrionales; f__Pseudoalteromonadaceae; g__; s__	4e-26
276493	3.88341	6.07939	0.000850885	NA	NA	NA		k__Bacteria; p__Proteobacteria; c__Gammaproteobacteria; o__Vibrionales; f__Pseudoalteromonadaceae; g__; s__	1e-35
New.ReferenceOTU7392	2.30875	5.21004	0.000894257	NA	NA	NA		k__Bacteria; p__Proteobacteria; c__Gammaproteobacteria; o__Vibrionales; f__Pseudoalteromonadaceae; g__; s__	4e-26
New.ReferenceOTU29289	2.22968	4.41728	0.00178895	NA	NA	NA		k__Bacteria; p__Proteobacteria; c__Gammaproteobacteria; o__Vibrionales; f__Pseudoalteromonadaceae; g__; s__	9e-24
New.ReferenceOTU33722	2.4759	4.72887	0.00186763	NA	NA	NA		k__Bacteria; p__Proteobacteria; c__Gammaproteobacteria; o__Vibrionales; f__Pseudoalteromonadaceae; g__; s__	2e-21
4451971	37.6013	3.74748	0.00188919	NA	NA	NA		k__Bacteria; p__Proteobacteria; c__Gammaproteobacteria; o__Vibrionales; f__Pseudoalteromonadaceae; g__; s__	1e-35
New.ReferenceOTU8749	1.79869	5.64614	0.00191095	NA	NA	NA		k__Bacteria; p__Proteobacteria; c__Gammaproteobacteria; o__Vibrionales; f__Pseudoalteromonadaceae; g__; s__	9e-24
New.ReferenceOTU5376	1.09725	5.20402	0.00606995	NA	NA	NA		k__Bacteria; p__Proteobacteria; c__Gammaproteobacteria; o__Vibrionales; f__Pseudoalteromonadaceae; g__; s__	2e-17
New.ReferenceOTU2232	0.412674	4.30751	0.0383696	NA	NA	NA		k__Bacteria; p__Proteobacteria; c__Gammaproteobacteria; o__Vibrionales; f__Pseudoalteromonadaceae; g__; s__	1e-22
159766	388.963	-4.92879	3.23e-16	NA	NA	NA		k__Bacteria; p__Proteobacteria; c__Gammaproteobacteria; o__Vibrionales; f__Pseudoalteromonadaceae; g__Pseudoalteromonas; s__	1e-35
161179	29.0947	-4.87979	1.16e-08	NA	NA	NA		k__Bacteria; p__Proteobacteria; c__Gammaproteobacteria; o__Vibrionales; f__Pseudoalteromonadaceae; g__Pseudoalteromonas; s__	2e-33
158267	10.6416	-6.24362	0.000303928	NA	NA	NA		k__Bacteria; p__Proteobacteria; c__Gammaproteobacteria; o__Vibrionales; f__Pseudoalteromonadaceae; g__Pseudoalteromonas; s__	6e-31
4313148	9.17473	3.23932	0.000357852	NA	NA	NA		k__Bacteria; p__Proteobacteria; c__Gammaproteobacteria; o__Vibrionales; f__Pseudoalteromonadaceae; g__Pseudoalteromonas; s__	1e-35
19398	0.835116	-5.25784	0.00145377	NA	NA	NA		k__Bacteria; p__Proteobacteria; c__Gammaproteobacteria; o__Vibrionales; f__Pseudoalteromonadaceae; g__Pseudoalteromonas; s__	1e-35
New.ReferenceOTU19898	1.09889	-5.53781	0.0346074	NA	NA	NA		k__Bacteria; p__Proteobacteria; c__Gammaproteobacteria; o__Vibrionales; f__Pseudoalteromonadaceae; g__Pseudoalteromonas; s__	1e-25
562023	0.474205	-3.15049	0.0451857	NA	NA	NA		k__Bacteria; p__Proteobacteria; c__Gammaproteobacteria; o__Vibrionales; f__Pseudoalteromonadaceae; g__Pseudoalteromonas; s__	1e-35
140912	14.1044	-4.43337	1.19e-05	NA	NA	NA		k__Bacteria; p__Proteobacteria; c__Gammaproteobacteria; o__Vibrionales; f__Pseudoalteromonadaceae; g__Pseudoalteromonas; s__piscicida	1e-35
1108701	1.10079	-4.08651	0.000535103	NA	NA	NA		k__Bacteria; p__Proteobacteria; c__Gammaproteobacteria; o__Vibrionales; f__Pseudoalteromonadaceae; g__Pseudoalteromonas; s__piscicida	7e-27
New.ReferenceOTU24581	NA	NA	NA	NA	NA	NA		k__Bacteria; p__Proteobacteria; c__Gammaproteobacteria; o__Vibrionales; f__Pseudoalteromonadaceae; g__Pseudoalteromonas; s__ruthenica	4e-22
631768	NA	NA	NA	6.02037	5.45582	0.00268359		k__Bacteria; p__Proteobacteria; c__Gammaproteobacteria; o__Vibrionales; f__Vibrionaceae; g__; s__	6e-31
772140	0.678958	4.62898	0.0243015	NA	NA	NA		k__Bacteria; p__Proteobacteria; c__Gammaproteobacteria; o__Vibrionales; f__Vibrionaceae; g__; s__	1e-35
New.ReferenceOTU32537	0.920964	5.34428	0.00388098	NA	NA	NA		k__Bacteria; p__Proteobacteria; c__Gammaproteobacteria; o__Vibrionales; f__Vibrionaceae; g__Enterovibrio; s__	2e-12
4452489	16.341	-2.22257	0.0191917	NA	NA	NA		k__Bacteria; p__Proteobacteria; c__Gammaproteobacteria; o__Vibrionales; f__Vibrionaceae; g__Photobacterium; s__	1e-35
109949	4.15169	4.75807	0.0252608	NA	NA	NA		k__Bacteria; p__Proteobacteria; c__Gammaproteobacteria; o__Vibrionales; f__Vibrionaceae; g__Photobacterium; s__	1e-35
4409846	NA	NA	NA	17.5633	3.46082	0.0160625		k__Bacteria; p__Proteobacteria; c__Gammaproteobacteria; o__Vibrionales; f__Vibrionaceae; g__Vibrio; s__	1e-35
148706	7.81938	5.01718	0.0151912	NA	NA	NA		k__Bacteria; p__Proteobacteria; c__Gammaproteobacteria; o__Vibrionales; f__Vibrionaceae; g__Vibrio; s__	1e-35
684491	0.834026	4.56204	0.0275654	NA	NA	NA		k__Bacteria; p__Proteobacteria; c__Gammaproteobacteria; o__Vibrionales; f__Vibrionaceae; g__Vibrio; s__	1e-35
579117	47.9037	-3.70696	0.0276099	NA	NA	NA		k__Bacteria; p__Proteobacteria; c__Gammaproteobacteria; o__Vibrionales; f__Vibrionaceae; g__Vibrio; s__	1e-35
324704	NA	NA	NA	26.0469	-6.49752	0.000140615		k__Bacteria; p__Proteobacteria; c__Gammaproteobacteria; o__Xanthomonadales; f__Sinobacteraceae; g__; s__	2e-33
New.ReferenceOTU7472	17.0525	6.31998	3.69e-10	NA	NA	NA		k__Bacteria; p__Proteobacteria; c__Gammaproteobacteria; o__Xanthomonadales; f__Sinobacteraceae; g__; s__	2e-24
332557	3.66621	-4.20015	0.00138444	NA	NA	NA		k__Bacteria; p__Proteobacteria; c__Gammaproteobacteria; o__Xanthomonadales; f__Xanthomonadaceae; g__; s__	1e-35
1855583	5.80433	-3.45653	0.0252407	NA	NA	NA		k__Bacteria; p__Proteobacteria; c__Gammaproteobacteria; o__Xanthomonadales; f__Xanthomonadaceae; g__; s__	1e-35
New.ReferenceOTU24744	9.90255	-3.53431	0.0241876	NA	NA	NA		k__Bacteria; p__SAR406; c__AB16; o__Arctic96B-7; f__A714017; g__SGSH944; s__	1e-32
227717	49.1049	-1.3437	0.0334006	NA	NA	NA		k__Bacteria; p__SAR406; c__AB16; o__Arctic96B-7; f__A714017; g__ZA3312c; s__	7e-37
New.ReferenceOTU35959	2.63452	5.16541	0.000566639	NA	NA	NA		k__Bacteria; p__Spirochaetes; c__[Brachyspirae]; o__[Brachyspirales]; f__Brachyspiraceae; g__; s__	1e-10
New.ReferenceOTU25260	1.19711	4.64679	0.0247411	NA	NA	NA		k__Bacteria; p__Spirochaetes; c__[Leptospirae]; o__[Leptospirales]; f__Leptospiraceae; g__Leptospira; s__	2e-24
New.ReferenceOTU4607	0.922052	5.45689	0.00282264	NA	NA	NA		k__Bacteria; p__Spirochaetes; c__Spirochaetes; o__Spirochaetales; f__Spirochaetaceae; g__Spirochaeta; s__	2e-08
New.ReferenceOTU2364	1.47935	4.27745	0.0325904	NA	NA	NA		k__Bacteria; p__Tenericutes; c__Mollicutes; o__Mycoplasmatales; f__Mycoplasmataceae; g__Mycoplasma; s__	1e-28
New.ReferenceOTU15080	1.08904	5.71853	0.00114278	NA	NA	NA		k__Bacteria; p__Tenericutes; c__RF3; o__ML615J-28; f__; g__; s__	5e-09
New.ReferenceOTU30105	0.722055	5.1244	0.006384	NA	NA	NA		k__Bacteria; p__Tenericutes; c__RF3; o__ML615J-28; f__; g__; s__	6e-09
New.ReferenceOTU3275	0.623103	5.09829	0.00661136	NA	NA	NA		k__Bacteria; p__Tenericutes; c__RF3; o__ML615J-28; f__; g__; s__	6e-09
New.ReferenceOTU24707	0.643571	4.96823	0.00931826	NA	NA	NA		k__Bacteria; p__Tenericutes; c__RF3; o__ML615J-28; f__; g__; s__	6e-09
New.ReferenceOTU2904	0.510839	4.78702	0.0143265	NA	NA	NA		k__Bacteria; p__Tenericutes; c__RF3; o__ML615J-28; f__; g__; s__	7e-09
New.ReferenceOTU3796	0.570444	4.72485	0.0179279	NA	NA	NA		k__Bacteria; p__Tenericutes; c__RF3; o__ML615J-28; f__; g__; s__	1e-09
New.ReferenceOTU17924	0.475314	4.64003	0.0199549	NA	NA	NA		k__Bacteria; p__Tenericutes; c__RF3; o__ML615J-28; f__; g__; s__	6e-09
New.ReferenceOTU22980	0.557775	4.55225	0.0269672	NA	NA	NA		k__Bacteria; p__Tenericutes; c__RF3; o__ML615J-28; f__; g__; s__	6e-09
New.ReferenceOTU4385	0.364513	4.27585	0.0401409	NA	NA	NA		k__Bacteria; p__Tenericutes; c__RF3; o__ML615J-28; f__; g__; s__	6e-09
New.ReferenceOTU15688	0.290075	4.15064	0.0480414	NA	NA	NA		k__Bacteria; p__Tenericutes; c__RF3; o__ML615J-28; f__; g__; s__	6e-09
New.ReferenceOTU22875	NA	NA	NA	14.2485	-5.06658	0.00875623		k__Bacteria; p__Verrucomicrobia; c__Opitutae; o__Puniceicoccales; f__Puniceicoccaceae; g__Coraliomargarita; s__	2e-27
4229057	NA	NA	NA	45.8634	-4.3667	0.017615		k__Bacteria; p__Verrucomicrobia; c__Opitutae; o__Puniceicoccales; f__Puniceicoccaceae; g__Coraliomargarita; s__	6e-34
4472884	1.80163	-5.55423	0.00189682	NA	NA	NA		k__Bacteria; p__Verrucomicrobia; c__Opitutae; o__Puniceicoccales; f__Puniceicoccaceae; g__Coraliomargarita; s__	3e-33
227701	6.2991	-3.30755	0.0147025	NA	NA	NA		k__Bacteria; p__Verrucomicrobia; c__Opitutae; o__Puniceicoccales; f__Puniceicoccaceae; g__MB11C04; s__	2e-37
232886	NA	NA	NA	NA	NA	NA		k__Bacteria; p__Verrucomicrobia; c__Verruco-5; o__R76-B128; f__; g__; s__	1e-35
New.ReferenceOTU15868	133.829	6.19396	7.65e-12	NA	NA	NA		k__Bacteria; p__Verrucomicrobia; c__Verrucomicrobiae; o__Verrucomicrobiales; f__Verrucomicrobiaceae; g__; s__	6e-28
4435425	102.418	4.06754	0.000177911	NA	NA	NA		k__Bacteria; p__Verrucomicrobia; c__Verrucomicrobiae; o__Verrucomicrobiales; f__Verrucomicrobiaceae; g__; s__	4e-35
New.ReferenceOTU12101	1.54766	5.18328	0.0083831	NA	NA	NA		k__Bacteria; p__Verrucomicrobia; c__Verrucomicrobiae; o__Verrucomicrobiales; f__Verrucomicrobiaceae; g__; s__	3e-23
1131823	NA	NA	NA	9.08129	4.29528	0.0366063		k__Bacteria; p__Verrucomicrobia; c__Verrucomicrobiae; o__Verrucomicrobiales; f__Verrucomicrobiaceae; g__Rubritalea; s__	4e-35
805574	23.6648	7.682	3.26e-12	NA	NA	NA		k__Bacteria; p__Verrucomicrobia; c__Verrucomicrobiae; o__Verrucomicrobiales; f__Verrucomicrobiaceae; g__Rubritalea; s__	1e-32
739118	17.5671	4.22573	1.51e-07	NA	NA	NA		k__Bacteria; p__Verrucomicrobia; c__Verrucomicrobiae; o__Verrucomicrobiales; f__Verrucomicrobiaceae; g__Rubritalea; s__	4e-35
2873833	40.563	5.80671	1.94e-07	NA	NA	NA		k__Bacteria; p__Verrucomicrobia; c__Verrucomicrobiae; o__Verrucomicrobiales; f__Verrucomicrobiaceae; g__Rubritalea; s__	2e-30
New.ReferenceOTU4732	6.77276	4.94899	0.000729361	NA	NA	NA		k__Bacteria; p__Verrucomicrobia; c__Verrucomicrobiae; o__Verrucomicrobiales; f__Verrucomicrobiaceae; g__Rubritalea; s__	3e-23
New.ReferenceOTU10458	5.15961	5.35365	0.00290852	NA	NA	NA		k__Bacteria; p__Verrucomicrobia; c__Verrucomicrobiae; o__Verrucomicrobiales; f__Verrucomicrobiaceae; g__Rubritalea; s__	8e-21
New.ReferenceOTU31872	3.27776	4.98246	0.00416551	NA	NA	NA		k__Bacteria; p__Verrucomicrobia; c__Verrucomicrobiae; o__Verrucomicrobiales; f__Verrucomicrobiaceae; g__Rubritalea; s__	6e-28
New.ReferenceOTU6713	0.642612	-5.71043	0.00441604	NA	NA	NA		k__Bacteria; p__WPS-2; c__; o__; f__; g__; s__	9e-27
New.ReferenceOTU24233	NA	NA	NA	1.70168	4.29847	0.0286457		k__Bacteria; p__WS3; c__PRR-12; o__Sediment-1; f__PRR-10; g__; s__	2e-12
New.ReferenceOTU9562	NA	NA	NA	21.3861	6.09025	7.23e-06		No blast hit	None
New.ReferenceOTU29236	NA	NA	NA	60.7663	5.50107	0.000486419		No blast hit	None
New.ReferenceOTU23612	NA	NA	NA	142.158	-4.36106	0.000548959		No blast hit	None
New.ReferenceOTU34148	NA	NA	NA	73.314	6.03375	0.000792843		No blast hit	None
New.ReferenceOTU28162	NA	NA	NA	8.00334	5.81865	0.000958013		No blast hit	None
New.ReferenceOTU10352	NA	NA	NA	178.416	5.65811	0.00127964		No blast hit	None
New.ReferenceOTU18403	NA	NA	NA	19.2519	5.79396	0.00162045		No blast hit	None
New.ReferenceOTU23139	NA	NA	NA	77.4231	5.17449	0.00168111		No blast hit	None
New.ReferenceOTU8944	NA	NA	NA	8.31945	4.66032	0.00210202		No blast hit	None
New.ReferenceOTU9835	NA	NA	NA	58.4238	4.55932	0.00227255		No blast hit	None
New.ReferenceOTU20756	NA	NA	NA	11.0716	5.58606	0.00242687		No blast hit	None
New.ReferenceOTU16026	NA	NA	NA	11.191	5.49853	0.00315601		No blast hit	None
New.ReferenceOTU21495	NA	NA	NA	556.242	5.18729	0.00324768		No blast hit	None
New.ReferenceOTU3429	NA	NA	NA	132.383	4.02723	0.00331497		No blast hit	None
New.ReferenceOTU22934	NA	NA	NA	342.981	4.58576	0.00343241		No blast hit	None
New.ReferenceOTU10156	NA	NA	NA	15.9347	5.48335	0.00354194		No blast hit	None
New.ReferenceOTU17504	NA	NA	NA	171.241	5.02423	0.00354194		No blast hit	None
New.ReferenceOTU17363	NA	NA	NA	7.93263	5.39029	0.00356911		No blast hit	None
New.ReferenceOTU23489	NA	NA	NA	21.3705	5.10827	0.00373186		No blast hit	None
New.ReferenceOTU921	NA	NA	NA	52.9886	5.01814	0.00423744		No blast hit	None
New.ReferenceOTU18266	NA	NA	NA	7.14805	5.29415	0.00452814		No blast hit	None
New.ReferenceOTU3829	NA	NA	NA	24.552	5.39815	0.00470585		No blast hit	None
New.ReferenceOTU12964	NA	NA	NA	168.277	5.32157	0.00623245		No blast hit	None
New.ReferenceOTU25429	NA	NA	NA	20.2861	4.90369	0.00806281		No blast hit	None
New.ReferenceOTU14740	NA	NA	NA	5.38445	4.96623	0.00933987		No blast hit	None
New.ReferenceOTU27526	NA	NA	NA	2.38132	4.75771	0.0113152		No blast hit	None
New.ReferenceOTU32285	NA	NA	NA	5.83284	4.83593	0.0126225		No blast hit	None
New.ReferenceOTU13225	NA	NA	NA	4.37025	4.77261	0.0134064		No blast hit	None
New.ReferenceOTU37465	NA	NA	NA	30.0666	4.78822	0.0134064		No blast hit	None
New.ReferenceOTU34163	NA	NA	NA	156.926	3.31121	0.0206592		No blast hit	None
New.ReferenceOTU4036	NA	NA	NA	2.32044	4.49006	0.02075		No blast hit	None
New.ReferenceOTU30958	NA	NA	NA	5.78816	4.30333	0.0217982		No blast hit	None
New.ReferenceOTU25189	NA	NA	NA	2.99285	4.49512	0.0218192		No blast hit	None
New.ReferenceOTU3051	NA	NA	NA	2.82532	4.04314	0.0230302		No blast hit	None
New.ReferenceOTU942	NA	NA	NA	1.55273	4.25469	0.0298989		No blast hit	None
New.ReferenceOTU19293	NA	NA	NA	58.7101	4.27826	0.0301035		No blast hit	None
New.ReferenceOTU33434	NA	NA	NA	9.38772	4.39784	0.0314572		No blast hit	None
New.ReferenceOTU1621	NA	NA	NA	10.1681	4.39651	0.0316163		No blast hit	None
New.ReferenceOTU25632	NA	NA	NA	2.3339	4.26926	0.0330932		No blast hit	None
New.ReferenceOTU24774	NA	NA	NA	7.16343	4.33187	0.0341495		No blast hit	None
New.ReferenceOTU17852	NA	NA	NA	4.82788	4.2668	0.0366063		No blast hit	None
New.ReferenceOTU8092	NA	NA	NA	2.09668	4.14476	0.039465		No blast hit	None
New.ReferenceOTU17910	NA	NA	NA	1.84361	4.12295	0.0399224		No blast hit	None
New.ReferenceOTU34633	NA	NA	NA	1.74262	4.07171	0.0428185		No blast hit	None
New.ReferenceOTU9888	NA	NA	NA	3.87921	4.09953	0.0459667		No blast hit	None
New.ReferenceOTU37478	NA	NA	NA	5.09745	4.11081	0.0460271		No blast hit	None
New.ReferenceOTU12371	NA	NA	NA	4.62739	4.07233	0.0484225		No blast hit	None
New.ReferenceOTU7136	NA	NA	NA	3.4822	4.05223	0.048841		No blast hit	None
New.ReferenceOTU17106	513.846	7.45339	3.6e-29	NA	NA	NA		No blast hit	None
New.ReferenceOTU37132	1305.25	7.05015	2.01e-23	NA	NA	NA		No blast hit	None
New.ReferenceOTU695	69.7425	7.28303	3.37e-19	NA	NA	NA		No blast hit	None
New.ReferenceOTU7025	167.904	6.89849	9.42e-17	NA	NA	NA		No blast hit	None
New.ReferenceOTU12055	1696.32	7.17762	1.72e-11	NA	NA	NA		No blast hit	None
New.ReferenceOTU32699	8.84675	-7.40677	2.87e-11	NA	NA	NA		No blast hit	None
New.ReferenceOTU16586	2.47156	-7.00217	3.3e-11	NA	NA	NA		No blast hit	None
New.ReferenceOTU3577	150.417	6.12676	1.32e-10	NA	NA	NA		No blast hit	None
New.ReferenceOTU6306	465.212	6.32168	3.52e-10	NA	NA	NA		No blast hit	None
New.ReferenceOTU37385	409.928	5.90439	3.78e-10	NA	NA	NA		No blast hit	None
New.ReferenceOTU2248	7.37841	-6.40104	4.6e-10	NA	NA	NA		No blast hit	None
New.ReferenceOTU18113	12.005	-8.10531	6.87e-10	NA	NA	NA		No blast hit	None
New.ReferenceOTU20138	9.0631	6.98746	9.8e-08	NA	NA	NA		No blast hit	None
New.ReferenceOTU10100	8.35418	6.52668	1.64e-07	NA	NA	NA		No blast hit	None
New.ReferenceOTU685	7.5625	6.47039	2.31e-07	NA	NA	NA		No blast hit	None
New.ReferenceOTU37099	10.3457	6.69602	4.73e-07	NA	NA	NA		No blast hit	None
New.ReferenceOTU9299	10.2889	7.6868	8.12e-07	NA	NA	NA		No blast hit	None
New.ReferenceOTU35573	18.6941	6.35444	9.92e-07	NA	NA	NA		No blast hit	None
New.ReferenceOTU32970	17.281	-3.00119	1.06e-06	NA	NA	NA		No blast hit	None
New.ReferenceOTU15476	35.6654	5.30112	1.14e-06	NA	NA	NA		No blast hit	None
New.ReferenceOTU4488	4.81903	-3.98659	1.35e-06	NA	NA	NA		No blast hit	None
New.ReferenceOTU7306	38.2789	5.57031	1.73e-06	NA	NA	NA		No blast hit	None
New.ReferenceOTU8620	146.521	6.83735	2e-06	NA	NA	NA		No blast hit	None
New.ReferenceOTU1147	5.51958	7.11432	1.13e-05	NA	NA	NA		No blast hit	None
New.ReferenceOTU20407	5.21432	6.056	1.28e-05	NA	NA	NA		No blast hit	None
New.ReferenceOTU2843	7.75932	6.96853	2.62e-05	NA	NA	NA		No blast hit	None
New.ReferenceOTU34	12.5904	5.02489	2.83e-05	NA	NA	NA		No blast hit	None
New.ReferenceOTU10420	17.4188	-3.66493	3.18e-05	NA	NA	NA		No blast hit	None
New.ReferenceOTU2514	3.72328	-3.85141	3.38e-05	NA	NA	NA		No blast hit	None
New.ReferenceOTU13400	3.36466	-3.78718	4.47e-05	NA	NA	NA		No blast hit	None
New.ReferenceOTU381	2.90866	6.65379	4.98e-05	NA	NA	NA		No blast hit	None
New.ReferenceOTU32072	12.7036	5.98547	5.17e-05	NA	NA	NA		No blast hit	None
New.ReferenceOTU29929	72.8332	4.46064	6.45e-05	NA	NA	NA		No blast hit	None
New.ReferenceOTU26832	5.01665	5.89549	6.47e-05	NA	NA	NA		No blast hit	None
New.ReferenceOTU23249	5.19452	-4.20461	7.57e-05	NA	NA	NA		No blast hit	None
New.ReferenceOTU24986	6.43136	6.7014	7.64e-05	NA	NA	NA		No blast hit	None
New.ReferenceOTU3731	2.75583	6.55048	8.12e-05	NA	NA	NA		No blast hit	None
New.ReferenceOTU36117	55.5678	-3.8112	8.79e-05	NA	NA	NA		No blast hit	None
New.ReferenceOTU9023	20.2911	5.65952	8.95e-05	NA	NA	NA		No blast hit	None
New.ReferenceOTU6494	2.33436	5.17438	9.63e-05	NA	NA	NA		No blast hit	None
New.ReferenceOTU12653	6.97349	5.70716	0.000128906	NA	NA	NA		No blast hit	None
New.ReferenceOTU13256	65.3857	4.97443	0.000175225	NA	NA	NA		No blast hit	None
New.ReferenceOTU14735	4.17913	6.4538	0.000176801	NA	NA	NA		No blast hit	None
New.ReferenceOTU33869	2.95227	6.37171	0.000177911	NA	NA	NA		No blast hit	None
New.ReferenceOTU3881	2.6997	6.33614	0.000187307	NA	NA	NA		No blast hit	None
New.ReferenceOTU27927	0.623955	-6.51174	0.000190905	NA	NA	NA		No blast hit	None
New.ReferenceOTU29339	2.08954	6.23882	0.000243638	NA	NA	NA		No blast hit	None
New.ReferenceOTU30038	2.26693	5.11082	0.000273939	NA	NA	NA		No blast hit	None
New.ReferenceOTU26512	79.9818	5.01244	0.000288022	NA	NA	NA		No blast hit	None
New.ReferenceOTU33092	1.47518	-6.63929	0.000290162	NA	NA	NA		No blast hit	None
New.ReferenceOTU9773	1.71842	5.19897	0.00030017	NA	NA	NA		No blast hit	None
New.ReferenceOTU34990	5.39332	6.32683	0.000302665	NA	NA	NA		No blast hit	None
New.ReferenceOTU29895	3.09895	6.23159	0.000370299	NA	NA	NA		No blast hit	None
New.ReferenceOTU6724	7.6242	4.67279	0.000384374	NA	NA	NA		No blast hit	None
New.ReferenceOTU30590	17.5959	-4.41876	0.000413405	NA	NA	NA		No blast hit	None
New.ReferenceOTU11594	2.73482	6.16839	0.000490727	NA	NA	NA		No blast hit	None
New.ReferenceOTU35638	1.7066	6.01818	0.000514733	NA	NA	NA		No blast hit	None
New.ReferenceOTU1539	0.92353	-4.24671	0.000524376	NA	NA	NA		No blast hit	None
New.ReferenceOTU32249	1.68705	6.00028	0.000569075	NA	NA	NA		No blast hit	None
New.ReferenceOTU15073	2.53562	4.99119	0.000573541	NA	NA	NA		No blast hit	None
New.ReferenceOTU221	62.862	5.6866	0.000597491	NA	NA	NA		No blast hit	None
New.ReferenceOTU15546	0.963335	-3.97059	0.000687598	NA	NA	NA		No blast hit	None
New.ReferenceOTU22806	1.44945	5.88959	0.000773792	NA	NA	NA		No blast hit	None
New.ReferenceOTU21660	2.78296	6.02181	0.00078628	NA	NA	NA		No blast hit	None
New.ReferenceOTU33770	1.63453	5.89493	0.000806519	NA	NA	NA		No blast hit	None
New.ReferenceOTU33300	17.3119	5.25176	0.000853268	NA	NA	NA		No blast hit	None
New.ReferenceOTU9438	18.464	5.08461	0.000886722	NA	NA	NA		No blast hit	None
New.ReferenceOTU33885	36.9309	5.64031	0.000886722	NA	NA	NA		No blast hit	None
New.ReferenceOTU34712	2.80129	-2.55046	0.000999865	NA	NA	NA		No blast hit	None
New.ReferenceOTU34197	1.70092	4.82804	0.00107415	NA	NA	NA		No blast hit	None
New.ReferenceOTU6017	2.69887	4.68539	0.00109964	NA	NA	NA		No blast hit	None
New.ReferenceOTU30168	2.78792	5.85472	0.00114619	NA	NA	NA		No blast hit	None
New.ReferenceOTU17618	3.38447	5.30085	0.00117022	NA	NA	NA		No blast hit	None
New.ReferenceOTU4681	13.3324	5.75546	0.0012362	NA	NA	NA		No blast hit	None
New.ReferenceOTU7252	6.37429	-4.89858	0.00127147	NA	NA	NA		No blast hit	None
New.ReferenceOTU6951	3.93888	5.01286	0.00129687	NA	NA	NA		No blast hit	None
New.ReferenceOTU28097	6.81646	5.56112	0.00132048	NA	NA	NA		No blast hit	None
New.ReferenceOTU6347	4.93927	5.96349	0.00135416	NA	NA	NA		No blast hit	None
New.ReferenceOTU27453	4.77013	-3.8193	0.00142087	NA	NA	NA		No blast hit	None
New.ReferenceOTU15716	4.99351	4.74266	0.00145278	NA	NA	NA		No blast hit	None
New.ReferenceOTU15718	6.7853	5.31294	0.00180049	NA	NA	NA		No blast hit	None
New.ReferenceOTU35619	7.49191	-4.73057	0.00180535	NA	NA	NA		No blast hit	None
New.ReferenceOTU32538	9.34955	5.92072	0.00187783	NA	NA	NA		No blast hit	None
New.ReferenceOTU21264	1.66916	5.66035	0.0018964	NA	NA	NA		No blast hit	None
New.ReferenceOTU6065	1.18722	5.62004	0.00192115	NA	NA	NA		No blast hit	None
New.ReferenceOTU27962	1.69281	5.63296	0.00194091	NA	NA	NA		No blast hit	None
New.ReferenceOTU584	1.22659	5.59863	0.00194304	NA	NA	NA		No blast hit	None
New.ReferenceOTU30430	53.0885	4.45857	0.00195253	NA	NA	NA		No blast hit	None
New.ReferenceOTU33872	4.25825	4.61132	0.00199247	NA	NA	NA		No blast hit	None
New.ReferenceOTU23430	0.829165	-2.91758	0.00204549	NA	NA	NA		No blast hit	None
New.ReferenceOTU26718	3.24959	5.73027	0.00217117	NA	NA	NA		No blast hit	None
New.ReferenceOTU20947	8.46449	5.39922	0.0022095	NA	NA	NA		No blast hit	None
New.ReferenceOTU32375	4.00402	5.36233	0.00225546	NA	NA	NA		No blast hit	None
New.ReferenceOTU34054	16.3548	-3.14905	0.00241685	NA	NA	NA		No blast hit	None
New.ReferenceOTU28503	7.38259	5.64771	0.00242471	NA	NA	NA		No blast hit	None
New.ReferenceOTU829	1.72384	5.62388	0.00245583	NA	NA	NA		No blast hit	None
New.ReferenceOTU14611	1.13168	5.53622	0.00249924	NA	NA	NA		No blast hit	None
New.ReferenceOTU32451	0.987649	-5.92481	0.00262376	NA	NA	NA		No blast hit	None
New.ReferenceOTU35701	1.97428	-5.51908	0.00268932	NA	NA	NA		No blast hit	None
New.ReferenceOTU25396	2.07407	5.63208	0.002708	NA	NA	NA		No blast hit	None
New.ReferenceOTU26556	1.08217	5.50126	0.00273549	NA	NA	NA		No blast hit	None
New.ReferenceOTU21498	5.33226	5.72706	0.00274969	NA	NA	NA		No blast hit	None
New.ReferenceOTU33816	0.657902	-5.8116	0.00299587	NA	NA	NA		No blast hit	None
New.ReferenceOTU4418	13.8053	-2.01449	0.00301016	NA	NA	NA		No blast hit	None
New.ReferenceOTU35042	23.3886	-2.58966	0.00301016	NA	NA	NA		No blast hit	None
New.ReferenceOTU6439	0.380377	-4.73409	0.0030311	NA	NA	NA		No blast hit	None
New.ReferenceOTU33052	0.851026	-2.72308	0.00330334	NA	NA	NA		No blast hit	None
New.ReferenceOTU37420	1.44305	5.45867	0.00333315	NA	NA	NA		No blast hit	None
New.ReferenceOTU27040	1.88472	5.51671	0.00368845	NA	NA	NA		No blast hit	None
New.ReferenceOTU12978	2.57373	4.43086	0.00371792	NA	NA	NA		No blast hit	None
New.ReferenceOTU22232	2.48621	4.74058	0.00385421	NA	NA	NA		No blast hit	None
New.ReferenceOTU9394	1.0634	-5.19564	0.0041705	NA	NA	NA		No blast hit	None
New.ReferenceOTU32740	1.03067	5.33506	0.0044554	NA	NA	NA		No blast hit	None
New.ReferenceOTU19170	1.34614	-5.19472	0.0044554	NA	NA	NA		No blast hit	None
New.ReferenceOTU12625	5.27682	5.53079	0.0046489	NA	NA	NA		No blast hit	None
New.ReferenceOTU18131	2.52741	-3.27271	0.00466298	NA	NA	NA		No blast hit	None
New.ReferenceOTU11286	6.96551	5.5548	0.00473644	NA	NA	NA		No blast hit	None
New.ReferenceOTU9555	0.973158	5.2731	0.00478071	NA	NA	NA		No blast hit	None
New.ReferenceOTU16094	10.0987	4.83343	0.00478071	NA	NA	NA		No blast hit	None
New.ReferenceOTU33400	0.893652	5.27951	0.00499888	NA	NA	NA		No blast hit	None
New.ReferenceOTU23632	1.63145	4.33449	0.00501712	NA	NA	NA		No blast hit	None
New.ReferenceOTU19885	7.0261	5.39753	0.00505916	NA	NA	NA		No blast hit	None
New.ReferenceOTU37171	2.30952	5.32919	0.00535106	NA	NA	NA		No blast hit	None
New.ReferenceOTU5690	3.70986	4.70921	0.00617217	NA	NA	NA		No blast hit	None
New.ReferenceOTU27444	0.875873	5.19217	0.006384	NA	NA	NA		No blast hit	None
New.ReferenceOTU9845	0.674463	5.13242	0.0063896	NA	NA	NA		No blast hit	None
New.ReferenceOTU24181	0.991436	5.16079	0.00669807	NA	NA	NA		No blast hit	None
New.ReferenceOTU20799	0.865793	5.14125	0.006732	NA	NA	NA		No blast hit	None
New.ReferenceOTU35284	1.086	5.20936	0.006732	NA	NA	NA		No blast hit	None
New.ReferenceOTU20400	0.495178	-5.15702	0.00691147	NA	NA	NA		No blast hit	None
New.ReferenceOTU13792	3.83641	3.99901	0.00712925	NA	NA	NA		No blast hit	None
New.ReferenceOTU30848	1.37934	5.23667	0.0071916	NA	NA	NA		No blast hit	None
New.ReferenceOTU32550	0.783281	5.127	0.00720356	NA	NA	NA		No blast hit	None
New.ReferenceOTU22867	0.388217	-5.43568	0.00738589	NA	NA	NA		No blast hit	None
New.ReferenceOTU18856	5.07109	-3.24142	0.00744391	NA	NA	NA		No blast hit	None
New.ReferenceOTU29919	6.06422	-2.12751	0.007668	NA	NA	NA		No blast hit	None
New.ReferenceOTU25355	1.20797	4.68956	0.00766956	NA	NA	NA		No blast hit	None
New.ReferenceOTU24885	1.2439	5.14149	0.00768217	NA	NA	NA		No blast hit	None
New.ReferenceOTU14100	1.43822	-6.24033	0.00796224	NA	NA	NA		No blast hit	None
New.ReferenceOTU33695	6.36777	4.80121	0.00803681	NA	NA	NA		No blast hit	None
New.ReferenceOTU5216	6.62972	-2.45022	0.00824232	NA	NA	NA		No blast hit	None
New.ReferenceOTU24085	0.385242	-5.34817	0.00827943	NA	NA	NA		No blast hit	None
New.ReferenceOTU29704	2.07615	5.2133	0.00861359	NA	NA	NA		No blast hit	None
New.ReferenceOTU26910	0.39184	-5.35503	0.00876704	NA	NA	NA		No blast hit	None
New.ReferenceOTU30766	1.06842	5.07829	0.00886077	NA	NA	NA		No blast hit	None
New.ReferenceOTU3286	11.3595	-2.99639	0.00896119	NA	NA	NA		No blast hit	None
New.ReferenceOTU21921	1.1533	-4.39663	0.00909412	NA	NA	NA		No blast hit	None
New.ReferenceOTU32869	2.14844	5.18173	0.00909412	NA	NA	NA		No blast hit	None
New.ReferenceOTU21794	6.88055	-2.38678	0.00909412	NA	NA	NA		No blast hit	None
New.ReferenceOTU9768	0.603853	4.97659	0.0092948	NA	NA	NA		No blast hit	None
New.ReferenceOTU6194	0.553595	4.94743	0.00941829	NA	NA	NA		No blast hit	None
New.ReferenceOTU6018	0.392324	-4.94331	0.00975856	NA	NA	NA		No blast hit	None
New.ReferenceOTU37338	0.54581	-4.51718	0.00982788	NA	NA	NA		No blast hit	None
New.ReferenceOTU20344	13.3193	5.24555	0.0100654	NA	NA	NA		No blast hit	None
New.ReferenceOTU23151	0.79611	5.01015	0.0102003	NA	NA	NA		No blast hit	None
New.ReferenceOTU953	7.33132	4.49155	0.0103708	NA	NA	NA		No blast hit	None
New.ReferenceOTU30173	5.63892	5.20119	0.0105742	NA	NA	NA		No blast hit	None
New.ReferenceOTU15367	12.0855	4.33254	0.0106901	NA	NA	NA		No blast hit	None
New.ReferenceOTU10815	3.9488	4.85675	0.010705	NA	NA	NA		No blast hit	None
New.ReferenceOTU32439	1.15258	4.58657	0.010896	NA	NA	NA		No blast hit	None
New.ReferenceOTU9751	7.06148	4.23767	0.0111208	NA	NA	NA		No blast hit	None
New.ReferenceOTU8391	0.63227	4.9085	0.0113535	NA	NA	NA		No blast hit	None
New.ReferenceOTU3428	0.704209	4.91476	0.0124357	NA	NA	NA		No blast hit	None
New.ReferenceOTU6389	0.268313	-4.57176	0.0125294	NA	NA	NA		No blast hit	None
New.ReferenceOTU25569	1.76997	4.57762	0.0125294	NA	NA	NA		No blast hit	None
New.ReferenceOTU25964	0.543773	4.84377	0.0128232	NA	NA	NA		No blast hit	None
New.ReferenceOTU35527	0.99925	4.93714	0.0136014	NA	NA	NA		No blast hit	None
New.ReferenceOTU10674	1.12136	4.90292	0.014009	NA	NA	NA		No blast hit	None
New.ReferenceOTU7057	3.47269	5.03815	0.0141733	NA	NA	NA		No blast hit	None
New.ReferenceOTU37139	0.591936	4.81288	0.0141943	NA	NA	NA		No blast hit	None
New.ReferenceOTU5544	1.34731	-4.35516	0.0145152	NA	NA	NA		No blast hit	None
New.ReferenceOTU571	2.56614	-2.82699	0.0145152	NA	NA	NA		No blast hit	None
New.ReferenceOTU8630	0.709177	4.80723	0.0153369	NA	NA	NA		No blast hit	None
New.ReferenceOTU37166	0.576389	4.79133	0.0155711	NA	NA	NA		No blast hit	None
New.ReferenceOTU7401	0.529128	-3.13468	0.01565	NA	NA	NA		No blast hit	None
New.ReferenceOTU20246	1.82921	4.94627	0.0158893	NA	NA	NA		No blast hit	None
New.ReferenceOTU16446	2.00224	4.94572	0.0162446	NA	NA	NA		No blast hit	None
New.ReferenceOTU247	0.744464	4.80918	0.0163938	NA	NA	NA		No blast hit	None
New.ReferenceOTU37192	1.97621	4.89183	0.0164322	NA	NA	NA		No blast hit	None
New.ReferenceOTU10243	2.44276	4.9398	0.0166882	NA	NA	NA		No blast hit	None
New.ReferenceOTU17424	0.586938	4.75204	0.0175438	NA	NA	NA		No blast hit	None
New.ReferenceOTU18395	0.99407	-4.73417	0.0175865	NA	NA	NA		No blast hit	None
New.ReferenceOTU17673	1.57936	4.84263	0.0175931	NA	NA	NA		No blast hit	None
New.ReferenceOTU4728	19.949	-4.11192	0.0177361	NA	NA	NA		No blast hit	None
New.ReferenceOTU26060	0.451885	4.685	0.0180697	NA	NA	NA		No blast hit	None
New.ReferenceOTU37172	0.788478	4.78297	0.0182131	NA	NA	NA		No blast hit	None
New.ReferenceOTU614	0.667036	4.7588	0.01824	NA	NA	NA		No blast hit	None
New.ReferenceOTU25178	2.39375	-2.62061	0.0184237	NA	NA	NA		No blast hit	None
New.ReferenceOTU21766	1.60476	4.81374	0.0187853	NA	NA	NA		No blast hit	None
New.ReferenceOTU12960	2.05592	4.59581	0.0190568	NA	NA	NA		No blast hit	None
New.ReferenceOTU8865	0.782074	4.74616	0.0195901	NA	NA	NA		No blast hit	None
New.ReferenceOTU33159	2.19019	3.47547	0.0199191	NA	NA	NA		No blast hit	None
New.ReferenceOTU20554	0.49648	4.63964	0.0199549	NA	NA	NA		No blast hit	None
New.ReferenceOTU16666	8.40813	-2.18222	0.0199549	NA	NA	NA		No blast hit	None
New.ReferenceOTU10444	0.495435	-3.49584	0.0199652	NA	NA	NA		No blast hit	None
New.ReferenceOTU36581	1.30216	4.76782	0.0201348	NA	NA	NA		No blast hit	None
New.ReferenceOTU19929	1.85485	4.82186	0.0201723	NA	NA	NA		No blast hit	None
New.ReferenceOTU30469	1.47957	-4.22556	0.0202875	NA	NA	NA		No blast hit	None
New.ReferenceOTU2804	1.69048	4.79075	0.0212635	NA	NA	NA		No blast hit	None
New.ReferenceOTU20045	15.51	-3.3228	0.0216815	NA	NA	NA		No blast hit	None
New.ReferenceOTU28617	1.61721	4.09161	0.0221434	NA	NA	NA		No blast hit	None
New.ReferenceOTU409	2.60898	4.6301	0.0221717	NA	NA	NA		No blast hit	None
New.ReferenceOTU5541	0.625646	4.62239	0.0222168	NA	NA	NA		No blast hit	None
New.ReferenceOTU4129	0.99821	-3.9925	0.0222168	NA	NA	NA		No blast hit	None
New.ReferenceOTU18028	1.90862	4.50548	0.0224344	NA	NA	NA		No blast hit	None
New.ReferenceOTU3855	0.650316	-3.72132	0.0229926	NA	NA	NA		No blast hit	None
New.ReferenceOTU23876	1.39317	4.73806	0.0231694	NA	NA	NA		No blast hit	None
New.ReferenceOTU1904	0.47812	4.56572	0.0234085	NA	NA	NA		No blast hit	None
New.ReferenceOTU1965	0.549059	4.60347	0.023715	NA	NA	NA		No blast hit	None
New.ReferenceOTU1092	0.55429	4.57258	0.0237157	NA	NA	NA		No blast hit	None
New.ReferenceOTU14809	0.481138	4.5594	0.0238208	NA	NA	NA		No blast hit	None
New.ReferenceOTU32512	0.428369	-4.90129	0.0239443	NA	NA	NA		No blast hit	None
New.ReferenceOTU37030	0.537615	4.59605	0.0241322	NA	NA	NA		No blast hit	None
New.ReferenceOTU23981	0.664827	-4.25517	0.0241534	NA	NA	NA		No blast hit	None
New.ReferenceOTU20315	1.18318	4.69279	0.0243097	NA	NA	NA		No blast hit	None
New.ReferenceOTU4113	4.69363	2.92945	0.0244176	NA	NA	NA		No blast hit	None
New.ReferenceOTU16016	0.655414	-3.51384	0.024681	NA	NA	NA		No blast hit	None
New.ReferenceOTU14097	0.54801	4.58316	0.025116	NA	NA	NA		No blast hit	None
New.ReferenceOTU5168	0.427041	-2.93112	0.0256119	NA	NA	NA		No blast hit	None
New.ReferenceOTU25992	0.537642	4.52615	0.0261215	NA	NA	NA		No blast hit	None
New.ReferenceOTU1690	0.565499	4.54402	0.027297	NA	NA	NA		No blast hit	None
New.ReferenceOTU21036	0.316526	-4.79939	0.0278233	NA	NA	NA		No blast hit	None
New.ReferenceOTU19471	0.350967	-4.80503	0.0278524	NA	NA	NA		No blast hit	None
New.ReferenceOTU4609	0.350266	-4.65755	0.0283768	NA	NA	NA		No blast hit	None
New.ReferenceOTU33170	1.10581	4.60513	0.0283768	NA	NA	NA		No blast hit	None
New.ReferenceOTU16451	1.15559	4.60411	0.0284752	NA	NA	NA		No blast hit	None
New.ReferenceOTU29818	0.431973	-3.28529	0.0287112	NA	NA	NA		No blast hit	None
New.ReferenceOTU15402	0.560172	4.5097	0.0289705	NA	NA	NA		No blast hit	None
New.ReferenceOTU5236	0.359344	-4.77868	0.0290873	NA	NA	NA		No blast hit	None
New.ReferenceOTU34820	0.308048	-4.75613	0.030002	NA	NA	NA		No blast hit	None
New.ReferenceOTU20841	0.721085	-2.05098	0.0300104	NA	NA	NA		No blast hit	None
New.ReferenceOTU21425	0.718061	3.45249	0.030071	NA	NA	NA		No blast hit	None
New.ReferenceOTU9467	40.4773	4.10282	0.0301531	NA	NA	NA		No blast hit	None
New.ReferenceOTU10397	1.02887	4.5704	0.0301583	NA	NA	NA		No blast hit	None
New.ReferenceOTU20843	2.68636	-4.38707	0.0304627	NA	NA	NA		No blast hit	None
New.ReferenceOTU33298	1.9282	4.61536	0.0307052	NA	NA	NA		No blast hit	None
New.ReferenceOTU35845	0.121608	-4.61969	0.0308506	NA	NA	NA		No blast hit	None
New.ReferenceOTU9816	0.412665	4.41131	0.0314055	NA	NA	NA		No blast hit	None
New.ReferenceOTU32228	1.52348	4.5647	0.0317064	NA	NA	NA		No blast hit	None
New.ReferenceOTU9102	0.902831	4.51277	0.032285	NA	NA	NA		No blast hit	None
New.ReferenceOTU35475	2.01976	4.57115	0.0327928	NA	NA	NA		No blast hit	None
New.ReferenceOTU6161	2.6907	-1.91532	0.0338663	NA	NA	NA		No blast hit	None
New.ReferenceOTU23271	0.467887	4.38594	0.0340617	NA	NA	NA		No blast hit	None
New.ReferenceOTU18828	0.464684	4.40952	0.0343016	NA	NA	NA		No blast hit	None
New.ReferenceOTU4020	1.4926	3.34434	0.0345265	NA	NA	NA		No blast hit	None
New.ReferenceOTU7650	0.998517	3.5826	0.0345809	NA	NA	NA		No blast hit	None
New.ReferenceOTU10254	1.54394	4.49149	0.0347139	NA	NA	NA		No blast hit	None
New.ReferenceOTU22627	1.52192	4.50549	0.0355182	NA	NA	NA		No blast hit	None
New.ReferenceOTU8972	5.70963	4.16006	0.0356347	NA	NA	NA		No blast hit	None
New.ReferenceOTU9802	0.530204	4.37562	0.0357565	NA	NA	NA		No blast hit	None
New.ReferenceOTU26360	7.73398	3.96869	0.0362492	NA	NA	NA		No blast hit	None
New.ReferenceOTU17815	0.27943	-4.61707	0.0368166	NA	NA	NA		No blast hit	None
New.ReferenceOTU14453	1.40723	4.48918	0.0369115	NA	NA	NA		No blast hit	None
New.ReferenceOTU16792	0.565091	4.35199	0.0373162	NA	NA	NA		No blast hit	None
New.ReferenceOTU30876	2.10563	4.44326	0.0383152	NA	NA	NA		No blast hit	None
New.ReferenceOTU7846	0.893455	-4.01287	0.0386547	NA	NA	NA		No blast hit	None
New.ReferenceOTU29570	0.997755	-3.75134	0.0388491	NA	NA	NA		No blast hit	None
New.ReferenceOTU29495	1.15459	-4.46865	0.0399956	NA	NA	NA		No blast hit	None
New.ReferenceOTU5800	4.19428	4.04664	0.0403052	NA	NA	NA		No blast hit	None
New.ReferenceOTU35065	2.18421	4.0412	0.0413058	NA	NA	NA		No blast hit	None
New.ReferenceOTU23530	0.422414	-3.67974	0.0416869	NA	NA	NA		No blast hit	None
New.ReferenceOTU10208	1.08054	4.39405	0.0417175	NA	NA	NA		No blast hit	None
New.ReferenceOTU5679	1.20962	4.39885	0.0421444	NA	NA	NA		No blast hit	None
New.ReferenceOTU32533	0.710897	4.31849	0.042498	NA	NA	NA		No blast hit	None
New.ReferenceOTU6399	0.206953	-4.50872	0.0426093	NA	NA	NA		No blast hit	None
New.ReferenceOTU13435	1.0901	-3.81535	0.0426724	NA	NA	NA		No blast hit	None
New.ReferenceOTU8427	1.0084	4.34555	0.0430404	NA	NA	NA		No blast hit	None
New.ReferenceOTU4377	1.11864	4.37304	0.0435803	NA	NA	NA		No blast hit	None
New.ReferenceOTU24497	42.8799	4.33717	0.0435803	NA	NA	NA		No blast hit	None
New.ReferenceOTU377	0.272487	-3.78381	0.0436153	NA	NA	NA		No blast hit	None
New.ReferenceOTU10529	0.766664	-3.76117	0.0437739	NA	NA	NA		No blast hit	None
New.ReferenceOTU30364	0.269233	-4.24141	0.0445852	NA	NA	NA		No blast hit	None
New.ReferenceOTU6899	1.05544	4.35404	0.0448521	NA	NA	NA		No blast hit	None
New.ReferenceOTU23168	2.90001	4.38813	0.0449769	NA	NA	NA		No blast hit	None
New.ReferenceOTU24753	0.394376	4.21402	0.0452603	NA	NA	NA		No blast hit	None
New.ReferenceOTU10333	0.804303	4.32695	0.0452603	NA	NA	NA		No blast hit	None
New.ReferenceOTU19067	0.375879	-3.5651	0.0460468	NA	NA	NA		No blast hit	None
New.ReferenceOTU8952	0.422087	4.21269	0.0460468	NA	NA	NA		No blast hit	None
New.ReferenceOTU14696	0.324156	4.18442	0.0464646	NA	NA	NA		No blast hit	None
New.ReferenceOTU22693	0.805234	4.27047	0.0465401	NA	NA	NA		No blast hit	None
New.ReferenceOTU10197	0.559488	4.19734	0.0478898	NA	NA	NA		No blast hit	None
New.ReferenceOTU36214	0.42747	4.20853	0.0479694	NA	NA	NA		No blast hit	None
New.ReferenceOTU843	0.431067	4.18422	0.0480046	NA	NA	NA		No blast hit	None
New.ReferenceOTU25672	17.9639	4.18083	0.0480046	NA	NA	NA		No blast hit	None
New.ReferenceOTU6573	0.150117	-3.27999	0.0480168	NA	NA	NA		No blast hit	None
New.ReferenceOTU2122	0.286455	4.15195	0.0480168	NA	NA	NA		No blast hit	None
New.ReferenceOTU6008	0.177005	-4.42277	0.0480414	NA	NA	NA		No blast hit	None
New.ReferenceOTU3261	0.138457	-4.40111	0.0482823	NA	NA	NA		No blast hit	None
New.ReferenceOTU11299	0.847374	4.29008	0.0482823	NA	NA	NA		No blast hit	None
New.ReferenceOTU33070	2.12807	3.93118	0.0486145	NA	NA	NA		No blast hit	None
New.ReferenceOTU15280	3.16348	-5.32201	0.0486145	NA	NA	NA		No blast hit	None
New.ReferenceOTU12293	22.5678	4.27054	0.0488092	NA	NA	NA		No blast hit	None
New.ReferenceOTU31947	0.180864	-4.41277	0.0489889	NA	NA	NA		No blast hit	None
New.ReferenceOTU13282	NA	NA	NA	NA	NA	NA		No blast hit	None
New.ReferenceOTU15690	NA	NA	NA	NA	NA	NA		No blast hit	None
New.ReferenceOTU17571	NA	NA	NA	NA	NA	NA		No blast hit	None
New.ReferenceOTU21595	NA	NA	NA	NA	NA	NA		No blast hit	None
New.ReferenceOTU23613	NA	NA	NA	NA	NA	NA		No blast hit	None
New.ReferenceOTU3078	NA	NA	NA	NA	NA	NA		No blast hit	None
New.ReferenceOTU31333	NA	NA	NA	NA	NA	NA		No blast hit	None
New.ReferenceOTU4526	NA	NA	NA	NA	NA	NA		No blast hit	None
